# Supplementary material for: Identifying the Molecular Drivers of Pathogenic Aldehyde Dehydrogenase Missense Mutations in Cancer and Non-Cancer Diseases
Source: MDPI journal article supplement (doi:10.3390/ijms241210157), 2023-06-15
Supplement: s1 [file s1]

## Supporting Information

# Identifying the Molecular Drivers of Pathogenic Aldehyde Dehydrogenase Missense Mutations in Cancer and Non-Cancer Diseases

Dana Jessen-Howard <sup>1,†</sup>, Qisheng Pan <sup>1,2,†</sup> and David B. Ascher <sup>1,2,\*</sup>

<sup>1</sup> School of Chemistry and Molecular Bioscience, University of Queensland, Brisbane, QLD 4072, Australia; d.jessenhoward@uq.net.au (D.J.-H.); qisheng.pan@uq.net.au (Q.P.)

<sup>2</sup> Computational Biology and Clinical Informatics, Baker Heart and Diabetes Institute, Melbourne, VIC 3004, Australia

\* Correspondence: d.ascher@uq.edu.au; Tel.: +61-7-336-53991

† These authors contributed equally to this work.

## TABLES

**Table S1.** Structural difference between AlphaFold2 models and experimental structures of human ALDHs.

| Gene name | Length | PDB ID (chain A) | Canonical sequence coverage by structure | Aldehyde catalytic domain | RMSD (Å) |
|-----------|--------|------------------|------------------------------------------|---------------------------|----------|
| ALDH1A1   | 501    | 4WB9             | 9-501                                    | Yes                       | 0.449    |
| ALDH1A2   | 518    | 4X2Q             | 26-518                                   | Yes                       | 0.600    |
| ALDH1A3   | 512    | 6S6W             | 23-508                                   | Yes                       | 0.701    |
| ALDH1B1   | 517    | 7MJC             | 25-517                                   | Yes                       | 0.385    |
| ALDH1L1   | 902    | 2CFI             | 1-306                                    | No                        | 1.628    |
| ALDH1L2   | 923    | /                | /                                        | /                         | /        |
| ALDH2     | 517    | 1O00             | 24-517                                   | Yes                       | 0.214    |
| ALDH3A1   | 453    | 3SZA             | 2-448                                    | Yes                       | 0.230    |
| ALDH3A2   | 485    | 4QGK             | 1-460                                    | Yes                       | 0.306    |
| ALDH3B1   | 468    | /                | /                                        | /                         | /        |
| ALDH3B2   | 385    | /                | /                                        | /                         | /        |

|          |     |      |         |     |       |
|----------|-----|------|---------|-----|-------|
| ALDH4A1  | 563 | 3V9G | 23-563  | Yes | 0.261 |
| ALDH5A1  | 535 | 2W8N | 56-535  | Yes | 0.267 |
| ALDH6A1  | 535 | /    | /       | /   | /     |
| ALDH7A1  | 539 | 2J6L | 31-527  | Yes | 0.222 |
| ALDH8A1  | 487 | /    | /       | /   | /     |
| ALDH9A1  | 494 | 6QAK | 1-494   | Yes | 1.081 |
| ALDH16A1 | 802 | /    | /       | /   | /     |
| ALDH18A1 | 795 | 2H5G | 361-793 | Yes | 0.392 |

FIGURES

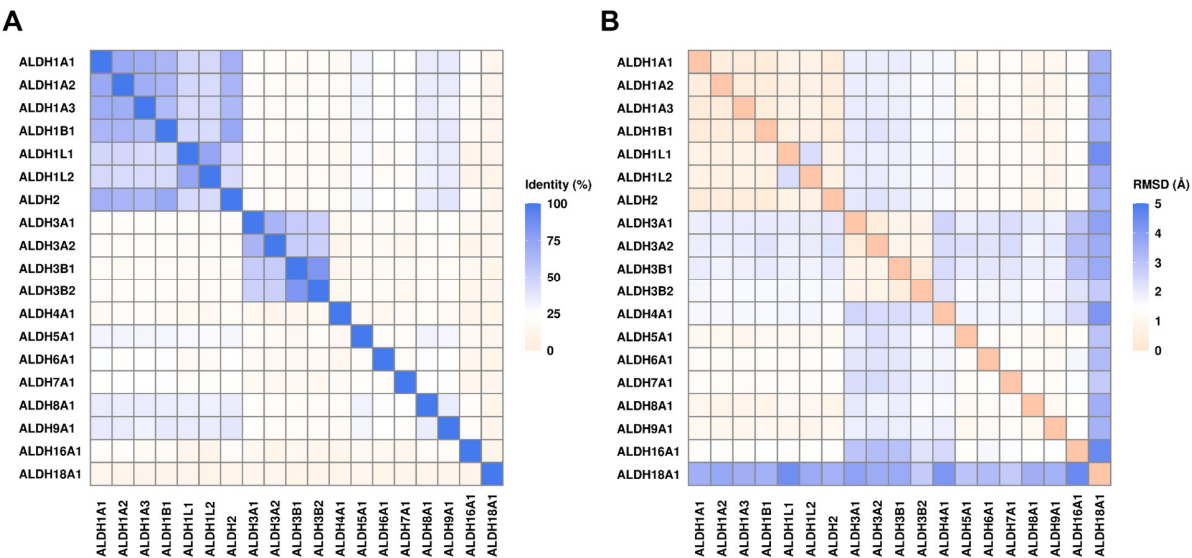

**Figure S1.** Sequence identity (A) and Structure similarity measured by root mean squared deviation (RMSD) (B) of 19 human ALDHs. All sequences were in canonical form. ALDH monomeric structures were generated using AlphaFold2.

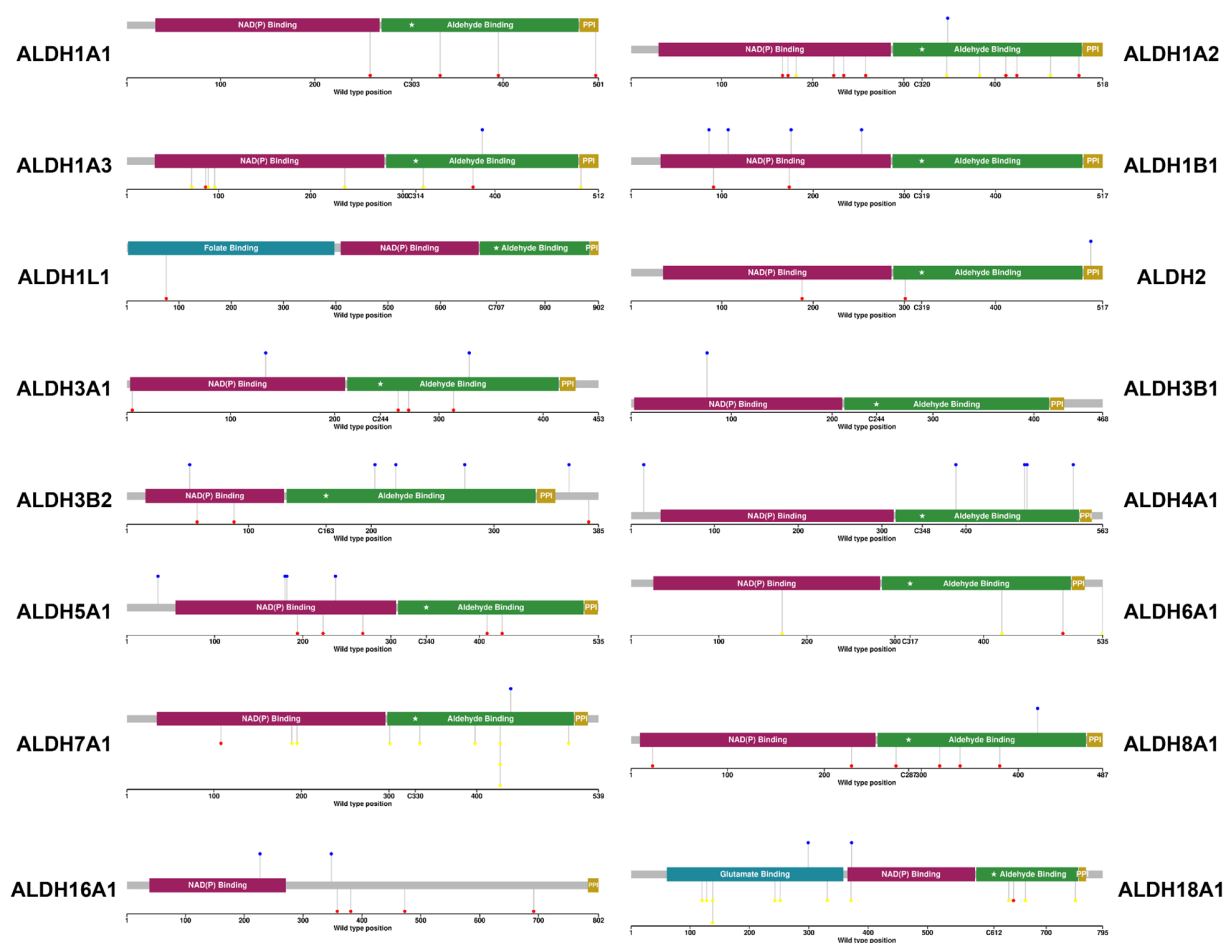

**Figure S2.** Distributions of variants of three labels, namely cancer-risk (red), benign (blue), and non-cancer diseases (yellow) of the sequences of human ALDHs. Each ALDH protein is coloured based on its different important regions, namely NAD(P)<sup>+</sup> binding region (dark magenta), aldehyde binding region (dark green), protein-protein interaction region (dark yellow), and addition domains such as folate/glutamate binding region (dark cyan).

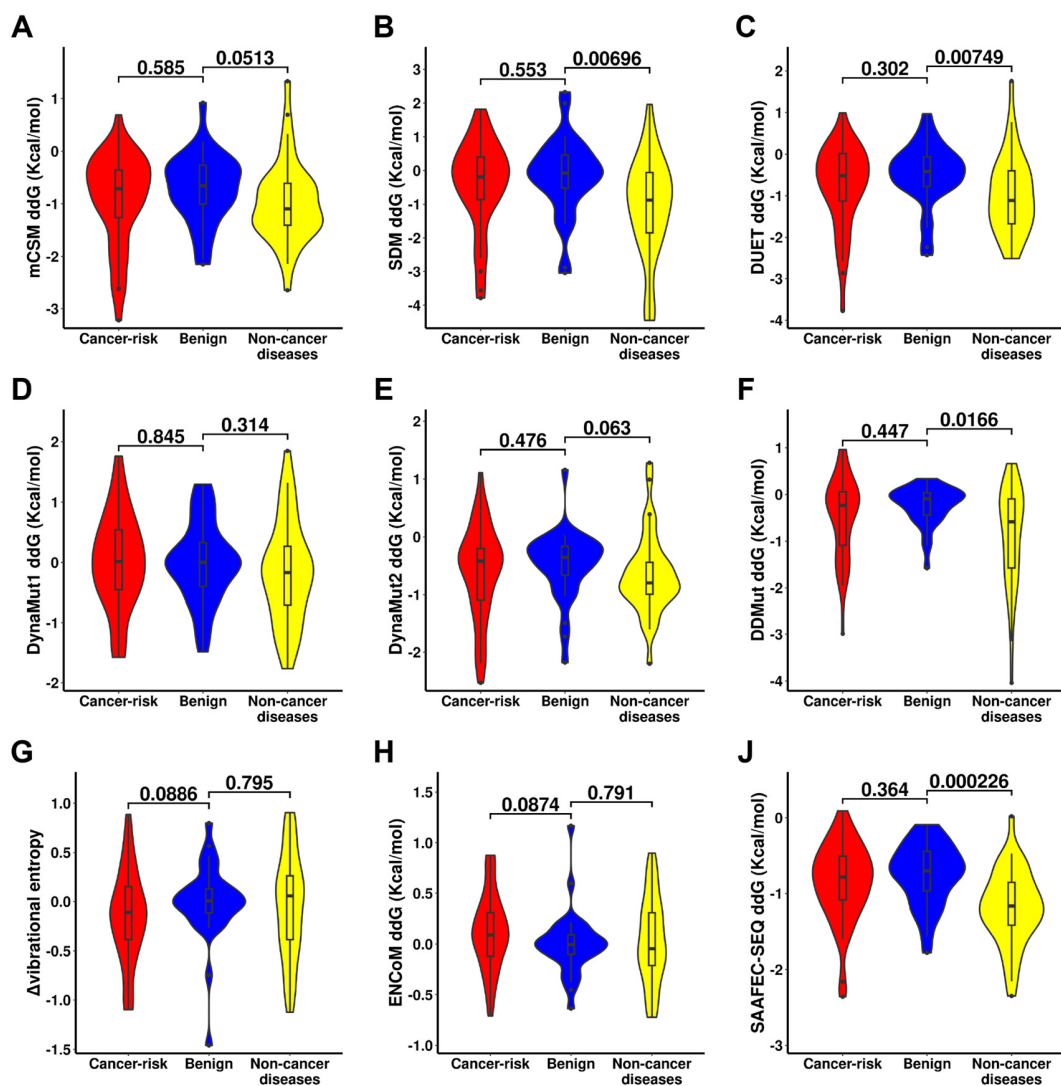

**Figure S3.** Qualitative comparison of the change of protein stability of “cancer vs benign mutations” and “non-cancer diseases vs benign mutations” in human ALDHs. Wilcox signed-rank test was used and p-value was presented above the bracket of two comparisons, respectively (significance level:  $p < 0.05$ ).

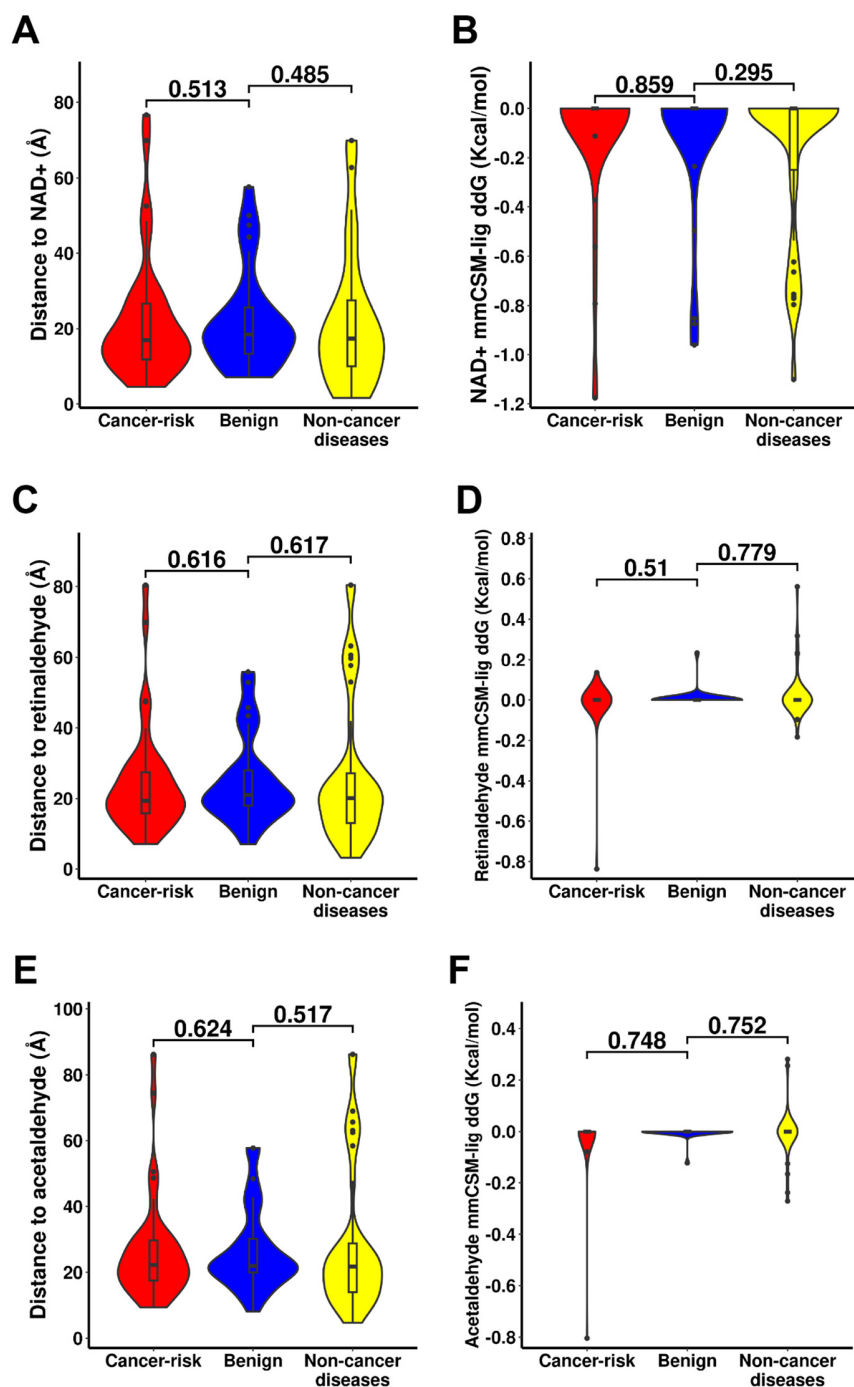

**Figure S4.** Qualitative comparison of the change of ligand binding affinity of “cancer vs benign mutations” and “non-cancer diseases vs benign mutations” in human ALDHs. The distance from the mutation site and the change of binding affinity to three substrates, namely NAD<sup>+</sup> (A-B), retinaldehyde (C-D), and acetaldehyde (E-F) were presented, respectively. Wilcox signed-rank test was used and p-value was presented above the bracket of two comparisons, respectively (significance level:  $p < 0.05$ ).

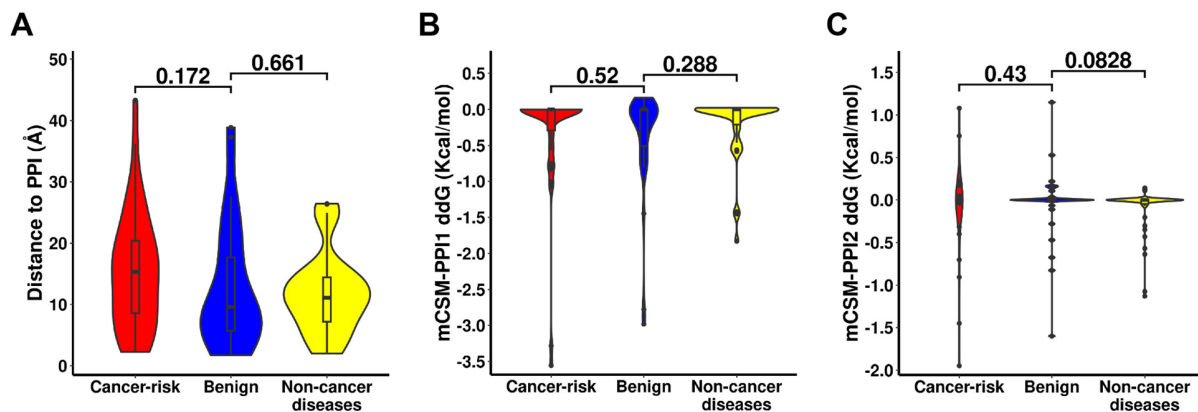

**Figure S5.** Qualitative comparison of the change of protein-protein interaction (PPI) affinity of “cancer vs benign mutations” and “non-cancer diseases vs benign mutations” in human ALDHs dimer. Both the distance to PPI interface (A) and the change of binding affinity (B-C) were presented. Wilcox signed-rank test was used and p-value was presented above the bracket of two comparisons, respectively (significance level:  $p < 0.05$ ).

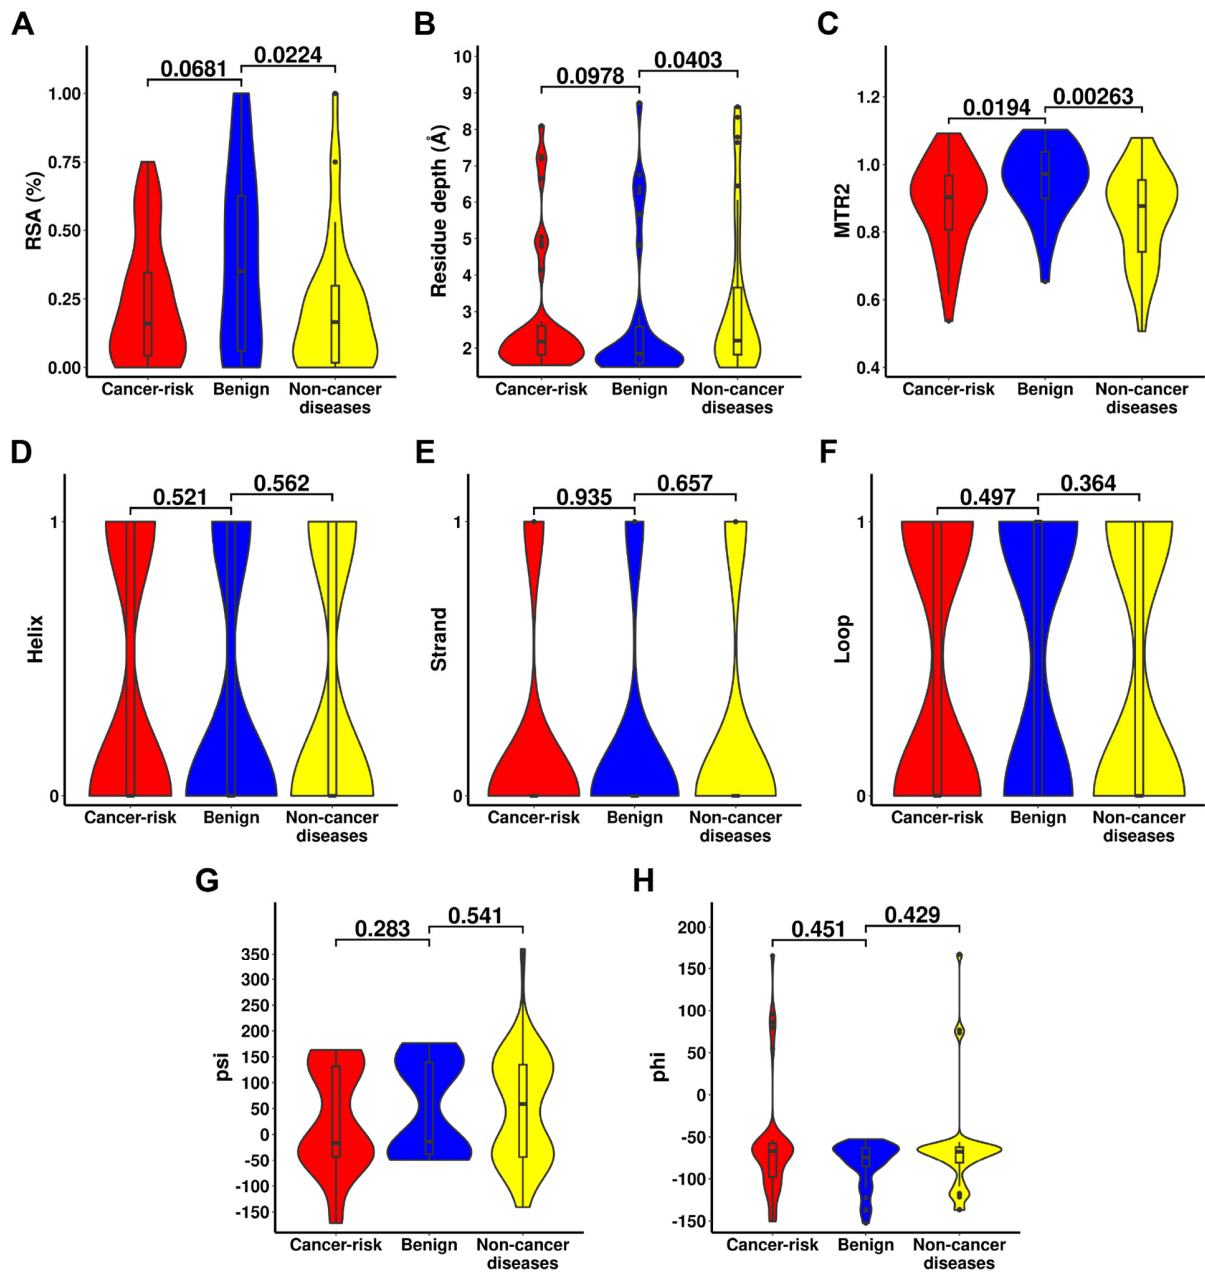

**Figure S6.** Qualitative comparison of the residue environment at the mutation site, including relative solvent accessibility (RSA) (A), residue depth (B), Mutation Tolerance Ratio 2 (MTR2) score (C), secondary structure type (D-F), and dihedral angles (G-H) of “cancer vs benign mutations” and “non-cancer diseases vs benign mutations” in human ALDHs. Wilcox signed-rank test was used and p-value was presented above the bracket of two comparisons, respectively (significance level:  $p < 0.05$ ).

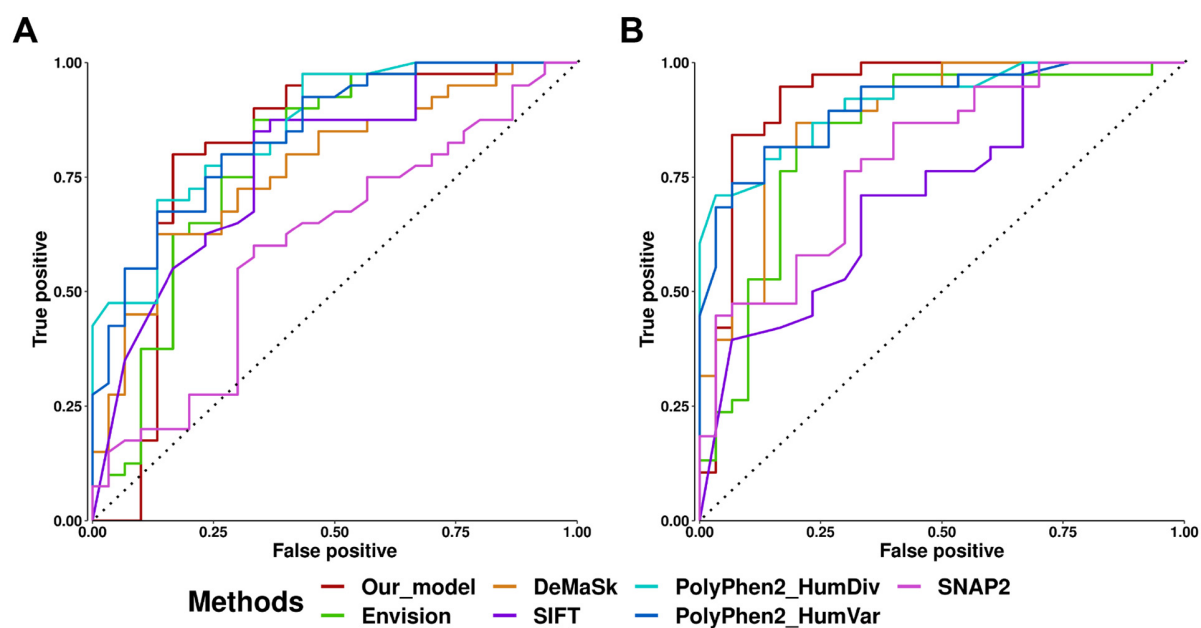

**Figure S7.** Performance comparison between our cancer-risk model (A) and non-cancer pathogenic model (B) and the state-of-the-art variant effect predictors.
