# Supplementary material for: Identifying the Molecular Drivers of Pathogenic Aldehyde Dehydrogenase Missense Mutations in Cancer and Non-Cancer Diseases
Source: Int J Mol Sci. 2023 Jun 15;24(12):10157. doi: 10.3390/ijms241210157 (PMC10299257; doi:10.3390/ijms241210157)
Supplement: Supplementary file 1 [file ijms-24-10157-s001.zip]

Archive with 5 entries (5 files):
- aldh_base_cancer_otherdiseases_benign_supps.xlsx
- aldh_cancer_databases_prediction.csv
- aldh_gnomad_prediction.csv
- ALDH_models.zip
- ALDH_Supplemental_Materials.pdf
