# Supplementary material for: Identifying the Molecular Drivers of Pathogenic Aldehyde Dehydrogenase Missense Mutations in Cancer and Non-Cancer Diseases
Source: Int J Mol Sci. 2023 Jun 15;24(12):10157. doi: 10.3390/ijms241210157 (PMC10299257; doi:10.3390/ijms241210157)
Supplement: Supplementary file 1 [file ijms-24-10157-s001.zip › aldh_base_cancer_otherdiseases_benign_supps.xlsx]

## Sheet: aldh_base_cancer_otherdiseases_
Gene	wt	pos	mt	mutation	source	label	note
ALDH1A1	G	259	R	G259R	cosmics/tcga/cbioportal	cancer-risk	Cancer type: Colorectal Adenocarcinoma
ALDH1A1	G	333	E	G333E	cosmics/tcga/cbioportal	cancer-risk	Cancer type: Cutaneous Melanoma, Skin Cancer, Non-Melanoma
ALDH1A1	R	395	H	R395H	cosmics/tcga/cbioportal	cancer-risk	Cancer type: Colorectal Adenocarcinoma, Prostate Adenocarcinoma, Prostate Neuroendocrine Carcinoma, Uterine Endometrioid Carcinoma
ALDH1A1	Q	498	E	Q498E	cosmics/tcga/cbioportal	cancer-risk	Cancer type: Cervical Squamous Cell Carcinoma
ALDH1A2	D	167	Y	D167Y	cosmics/tcga/cbioportal	cancer-risk	Cancer type: Colorectal Adenocarcinoma, Rectal Adenocarcinoma
ALDH1A2	R	173	I	R173I	cosmics/tcga/cbioportal	cancer-risk	Cancer type: Colorectal Adenocarcinoma, Rectal Adenocarcinoma
ALDH1A2	Q	182	K	Q182K	clinvar	pathogenic	congenital anomaly syndrome, cardiovascular, diaphragmatic, and associated pulmonary defects; PubMed ID: 33565183
ALDH1A2	G	223	R	G223R	cosmics/tcga/cbioportal	cancer-risk	Cancer type: Cutaneous Melanoma
ALDH1A2	G	234	E	G234E	cosmics/tcga/cbioportal	cancer-risk	Cancer type: Cutaneous Melanoma
ALDH1A2	K	258	N	K258N	cosmics/tcga/cbioportal	cancer-risk	Cancer type: Uterine Endometrioid Carcinoma
ALDH1A2	R	347	H	R347H	clinvar	pathogenic	congenital anomaly syndrome, cardiovascular, diaphragmatic, and associated pulmonary defects; PubMed ID: 33565183
ALDH1A2	V	348	I	V348I	gnomad	benign	Allele Frequency: 0.444
ALDH1A2	A	383	T	A383T	clinvar	pathogenic	congenital anomaly syndrome, cardiovascular, diaphragmatic, and associated pulmonary defects; PubMed ID: 33565183
ALDH1A2	R	412	W	R412W	cosmics/tcga/cbioportal	cancer-risk	Cancer type: Colon Adenocarcinoma, Stomach Adenocarcinoma, Uterine Endometrioid Carcinoma
ALDH1A2	E	424	K	E424K	cosmics/tcga/cbioportal	cancer-risk	Cancer type: Cutaneous Melanoma, Melanoma
ALDH1A2	S	461	Y	S461Y	clinvar	pathogenic	congenital anomaly syndrome, cardiovascular, diaphragmatic, and associated pulmonary defects; PubMed ID: 33565183
ALDH1A2	G	492	R	G492R	cosmics/tcga/cbioportal	cancer-risk	Cancer type: Cutaneous Melanoma, Cutaneous Squamous Cell Carcinoma, Skin Cancer, Non-Melanoma
ALDH1A3	V	71	M	V71M	clinvar	pathogenic	microphthalmia/anophthalmia; PubMed ID: 23881059
ALDH1A3	S	86	L	S86L	cosmics/tcga/cbioportal	cancer-risk	Cancer type: Colon Adenocarcinoma, Esophageal Adenocarcinoma, Rectal Adenocarcinoma
ALDH1A3	R	89	C	R89C	clinvar	pathogenic	microphthalmia/anophthalmia; PubMed ID: 23312594
ALDH1A3	R	96	H	R96H	clinvar	pathogenic	microphthalmia/anophthalmia; PubMed ID: 23881059
ALDH1A3	G	237	R	G237R	clinvar	pathogenic	microphthalmia/anophthalmia; PubMed ID: 28590501
ALDH1A3	V	322	M	V322M	clinvar	pathogenic	microphthalmia/anophthalmia; PubMed ID: 26995144
ALDH1A3	G	376	R	G376R	cosmics/tcga/cbioportal	cancer-risk	Cancer type: Intestinal Type Stomach Adenocarcinoma
ALDH1A3	M	386	V	M386V	gnomad	benign	Allele Frequency: 0.0593
ALDH1A3	A	493	P	A493P	clinvar	pathogenic	microphthalmia/anophthalmia; PubMed ID: 23312594
ALDH1B1	A	86	V	A86V	clinvar/gnomad	benign	Allele Frequency: 0.189
ALDH1B1	S	91	F	S91F	cosmics/tcga/cbioportal	cancer-risk	Cancer type: Cutaneous Melanoma
ALDH1B1	R	107	L	R107L	clinvar/gnomad	benign	Allele Frequency: 0.507
ALDH1B1	E	174	A	E174A	cosmics/tcga/cbioportal	cancer-risk	Cancer type: Rectal Adenocarcinoma
ALDH1B1	V	176	I	V176I	gnomad	benign	Allele Frequency: 0.0132
ALDH1B1	V	253	M	V253M	gnomad	benign	Allele Frequency: 0.954
ALDH1L1	L	76	F	L76F	cosmics/tcga/cbioportal	cancer-risk	Cancer type: Serous Ovarian Cancer
ALDH2	P	188	S	P188S	cosmics/tcga/cbioportal	cancer-risk	Cancer type: Angiosarcoma, Skin Cancer, Non-Melanoma
ALDH2	D	301	Y	D301Y	cosmics/tcga/cbioportal	cancer-risk	Cancer type: Papillary Thyroid Cancer
ALDH2	E	504	K	E504K	gnomad	benign	Allele Frequency: 0.0183
ALDH3A1	E	6	K	E6K	cosmics/tcga/cbioportal	cancer-risk	Cancer type: Bladder Squamous Cell Carcinoma, Bladder Urothelial Carcinoma, Esophageal Adenocarcinoma, Lung Adenocarcinoma, Plasma Cell Myeloma
ALDH3A1	S	134	A	S134A	gnomad	benign	Allele Frequency: 0.703
ALDH3A1	V	261	G	V261G	cosmics/tcga/cbioportal	cancer-risk	Cancer type: Serous Ovarian Cancer
ALDH3A1	F	271	L	F271L	cosmics/tcga/cbioportal	cancer-risk	Cancer type: Colorectal Adenocarcinoma, Uterine Endometrioid Carcinoma
ALDH3A1	R	314	H	R314H	cosmics/tcga/cbioportal	cancer-risk	Cancer type: Colon Adenocarcinoma, Mucinous Stomach Adenocarcinoma
ALDH3A1	P	329	A	P329A	gnomad	benign	Allele Frequency: 0.312
ALDH3B1	R	76	K	R76K	gnomad	benign	Allele Frequency: 0.329
ALDH3B2	S	52	N	S52N	gnomad	benign	Allele Frequency: 0.902
ALDH3B2	P	58	S	P58S	cosmics/tcga/cbioportal	cancer-risk	Cancer type: Cutaneous Melanoma, Uterine Endometrioid Carcinoma
ALDH3B2	G	88	E	G88E	cosmics/tcga/cbioportal	cancer-risk	Cancer type: Head and Neck Squamous Cell Carcinoma, Skin Cancer, Non-Melanoma
ALDH3B2	H	203	R	H203R	gnomad	benign	Allele Frequency: 0.98
ALDH3B2	S	220	G	S220G	gnomad	benign	Allele Frequency: 1.00
ALDH3B2	R	276	W	R276W	gnomad	benign	Allele Frequency: 0.0785
ALDH3B2	H	361	R	H361R	gnomad	benign	Allele Frequency: 0.903
ALDH3B2	M	377	I	M377I	cosmics/tcga/cbioportal	cancer-risk	Cancer type: Mucinous Stomach Adenocarcinoma, Skin Cancer, Non-Melanoma
ALDH4A1	P	16	L	P16L	gnomad	benign	Allele Frequency: 0.0197
ALDH4A1	F	388	L	F388L	gnomad	benign	Allele Frequency: 0.0161
ALDH4A1	V	470	I	V470I	gnomad	benign	Allele Frequency: 0.107
ALDH4A1	T	473	A	T473A	gnomad	benign	Allele Frequency: 0.0341
ALDH4A1	T	528	N	T528N	gnomad	benign	Allele Frequency: 0.0173
ALDH5A1	G	36	R	G36R	gnomad	benign	Allele Frequency: 0.0312
ALDH5A1	H	180	Y	H180Y	gnomad	benign	Allele Frequency: 0.315
ALDH5A1	P	182	L	P182L	gnomad	benign	Allele Frequency: 0.0369
ALDH5A1	P	194	L	P194L	clinvar	pathogenic	succinic semialdehyde dehydrogenase deficiency; PubMed ID: 33203024, 32402538
ALDH5A1	C	223	Y	C223Y	clinvar	pathogenic	succinic semialdehyde dehydrogenase deficiency; PubMed ID: 14635103, 31589614, 33203024, 32093054, 32402538, 25558043
ALDH5A1	A	237	S	A237S	clinvar/gnomad	benign	Allele Frequency: 0.0116
ALDH5A1	G	268	E	G268E	clinvar	pathogenic	succinic semialdehyde dehydrogenase deficiency; PubMed ID: 14635103, 11243727, 27104484, 27104484, 25525159, 20174634, 19300440, 31515079, 31440721, 32402538, 23825041, 26964512, 20804942, 11243727, 14635103, 25558043, 33203024
ALDH5A1	G	409	D	G409D	clinvar	pathogenic	succinic semialdehyde dehydrogenase deficiency; PubMed ID: 30829465, 11243727, 20304328, 28664505, 14635103, 32395407, 33531951, 32093054, 32402538, 33203024, 32887777, 14635103, 28664505
ALDH5A1	C	426	Y	C426Y	clinvar	pathogenic	developmental delay, ASD; PubMed ID: 32887777
ALDH6A1	Y	172	H	Y172H	clinvar	pathogenic	transient methylmalonic aciduria; PubMed ID: 23835272
ALDH6A1	P	421	S	P421S	clinvar	pathogenic	methylmalonate semialdehyde dehydrogenase deficiency; PubMed ID: 32151545
ALDH6A1	S	490	F	S490F	cosmics/tcga/cbioportal	cancer-risk	Cancer type: Cutaneous Melanoma, Cutaneous Squamous Cell Carcinoma, Melanoma
ALDH6A1	R	535	C	R535C	clinvar	pathogenic	transient methylmalonic aciduria; PubMed ID: 23835272
ALDH7A1	P	108	S	P108S	cosmics/tcga/cbioportal	cancer-risk	Cancer type: Cutaneous Melanoma, Melanoma, Skin Cancer, Non-Melanoma
ALDH7A1	G	189	E	G189E	clinvar	pathogenic	pre-natal and post-natal seizures; PubMed ID: 27856333
ALDH7A1	N	195	S	N195S	clinvar	pathogenic	epilepsy; PubMed ID: 19128417, 20554659, 23350806, 24789515, 24848745
ALDH7A1	N	301	I	N301I	clinvar	pathogenic	vitamin B6-dependent epilepsies; PubMed ID: 25553455, 27342130, 30005813, 24664145, 17068770, 26555630, 23022070, 31737911, 30043187, 32956737, 22784480, 17068770
ALDH7A1	R	335	Q	R335Q	clinvar	pathogenic	pyridoxine-dependent seizure; PubMed ID: 19128417, 30043187, 32956737, 27342130, 17068770, 24942048, 22784480
ALDH7A1	G	398	R	G398R	clinvar	pathogenic	pyridoxine-dependent epilepsy; PubMed ID: 22529283
ALDH7A1	E	427	D	E427D	clinvar	pathogenic	pyridoxine-dependent epilepsy; PubMed ID: 31652343
ALDH7A1	E	427	G	E427G	clinvar	pathogenic	pyridoxine-dependent epilepsy; PubMed ID: 31652343
ALDH7A1	E	427	Q	E427Q	clinvar	pathogenic	pyridoxine-dependent epilepsy; PubMed ID: 20301659, 16491085, 16491085, 17068770, 19128417, 20370816, 22371912, 22784480, 26224730, 29056246, 20301659
ALDH7A1	K	439	Q	K439Q	gnomad	benign	Allele Frequency: 0.111
ALDH7A1	G	505	R	G505R	clinvar	pathogenic	pyridoxine-dependent epilepsy; PubMed ID: 22784480, 24613284, 23350806, 19128417, 20814824, 22728861, 30043187, 31980526, 32685344, 31589614, 28492532, 19128417, 20554659, 20814824, 23350806, 24942048
ALDH8A1	S	23	L	S23L	cosmics/tcga/cbioportal	cancer-risk	Cancer type: Cutaneous Melanoma, Mycosis Fungoides
ALDH8A1	S	228	F	S228F	cosmics/tcga/cbioportal	cancer-risk	Cancer type: Cutaneous Melanoma
ALDH8A1	A	274	P	A274P	cosmics/tcga/cbioportal	cancer-risk	Cancer type: Serous Ovarian Cancer
ALDH8A1	P	319	L	P319L	cosmics/tcga/cbioportal	cancer-risk	Cancer type: Cutaneous Melanoma, Melanoma
ALDH8A1	S	340	R	S340R	cosmics/tcga/cbioportal	cancer-risk	Cancer type: Stomach Adenocarcinoma
ALDH8A1	I	381	S	I381S	cosmics/tcga/cbioportal	cancer-risk	Cancer type: Serous Ovarian Cancer
ALDH8A1	A	420	G	A420G	gnomad	benign	Allele Frequency: 0.0115
ALDH16A1	L	227	V	L227V	gnomad	benign	Allele Frequency: 0.601
ALDH16A1	A	348	T	A348T	gnomad	benign	Allele Frequency: 0.0103
ALDH16A1	R	358	C	R358C	cosmics/tcga/cbioportal	cancer-risk	Cancer type: Uterine Endometrioid Carcinoma
ALDH16A1	P	381	S	P381S	cosmics/tcga/cbioportal	cancer-risk	Cancer type: Cutaneous Melanoma, Skin Cancer, Non-Melanoma
ALDH16A1	S	473	F	S473F	cosmics/tcga/cbioportal	cancer-risk	Cancer type: Angiosarcoma
ALDH16A1	V	692	I	V692I	cosmics/tcga/cbioportal	cancer-risk	Cancer type: Cervical Squamous Cell Carcinoma
ALDH18A1	V	120	A	V120A	clinvar	pathogenic	spasticity, neuropathic pain; PubMed ID: 26297558, 26026163
ALDH18A1	R	128	H	R128H	clinvar	pathogenic	hereditary spastic paraplegia; growth retardation, tremor, microcephaly, developmental delay, intellectual disability; PubMed ID: 29915212, 26026163, 32798076
ALDH18A1	R	138	L	R138L	clinvar	pathogenic	cutis laxa; PubMed ID: 26320891
ALDH18A1	R	138	Q	R138Q	clinvar	pathogenic	cutis laxa; PubMed ID: 26320891
ALDH18A1	R	138	W	R138W	cosmics/tcga/cbioportal	cancer-risk	Cancer type: Pancreatic Adenocarcinoma, Prostate Adenocarcinoma, Uterine Endometrioid Carcinoma
ALDH18A1	V	243	L	V243L	clinvar	pathogenic	spastic paraplegia; PubMed ID: 26297558, 9973297
ALDH18A1	R	252	Q	R252Q	clinvar	pathogenic	hereditary spastic paraplegia; PubMed ID: 34184482, 26297558, 26026163, 8779323
ALDH18A1	T	299	I	T299I	gnomad	benign	Allele Frequency: 0.105
ALDH18A1	T	331	P	T331P	clinvar	pathogenic	variable developmental delay, neurological deficits, and loose skin; PubMed ID: 36067040
ALDH18A1	R	371	Q	R371Q	clinvar	pathogenic	paraplegia; PubMed ID: 31402623
ALDH18A1	S	372	Y	S372Y	gnomad	benign	Allele Frequency: 0.017
ALDH18A1	L	637	P	L637P	clinvar	pathogenic	hereditary spastic paraplegia; PubMed ID: 26026163
ALDH18A1	H	645	Y	H645Y	cosmics/tcga/cbioportal	cancer-risk	Cancer type: Cutaneous Melanoma, Cutaneous Squamous Cell Carcinoma, Melanoma
ALDH18A1	R	665	L	R665L	clinvar	pathogenic	spastic paraplegia; PubMed ID: 26297558, 26026163
ALDH18A1	R	749	Q	R749Q	clinvar	pathogenic	de Barsy syndrome, cellular lipid droplet phenotype, autosomal recessive cutis laxa type 3A, Warburg Micro syndrome; PubMed ID: 25077174
