# Supplementary material for: Identifying the Molecular Drivers of Pathogenic Aldehyde Dehydrogenase Missense Mutations in Cancer and Non-Cancer Diseases
Source: Int J Mol Sci. 2023 Jun 15;24(12):10157. doi: 10.3390/ijms241210157 (PMC10299257; doi:10.3390/ijms241210157)
Supplement: Supplementary file 1 [file ijms-24-10157-s001.zip › aldh_cancer_databases_prediction.csv]

Gene	wt	pos	mt	mutation	source	predictions
ALDH16A1	A	6	E	A6E	tcga/cbioportal	benign
ALDH16A1	T	15	A	T15A	cbioportal	benign
ALDH16A1	P	21	L	P21L	cbioportal	benign
ALDH16A1	K	50	E	K50E	cbioportal	benign
ALDH16A1	S	56	P	S56P	cbioportal	cancer-risk
ALDH16A1	D	61	V	D61V	cbioportal	cancer-risk
ALDH16A1	E	66	K	E66K	tcga	benign
ALDH16A1	E	66	Q	E66Q	cosmics/cbioportal	benign
ALDH16A1	D	78	N	D78N	tcga	cancer-risk
ALDH16A1	A	80	S	A80S	tcga/cbioportal	cancer-risk
ALDH16A1	A	86	T	A86T	cosmics	benign
ALDH16A1	A	89	T	A89T	cbioportal	benign
ALDH16A1	A	95	G	A95G	tcga/cbioportal	benign
ALDH16A1	P	97	A	P97A	tcga	cancer-risk
ALDH16A1	G	98	D	G98D	cbioportal	cancer-risk
ALDH16A1	A	102	T	A102T	cbioportal	benign
ALDH16A1	T	106	A	T106A	tcga/cbioportal	benign
ALDH16A1	R	117	W	R117W	tcga/cbioportal	cancer-risk
ALDH16A1	W	120	R	W120R	cbioportal	cancer-risk
ALDH16A1	S	124	F	S124F	cosmics	benign
ALDH16A1	V	126	M	V126M	cbioportal	cancer-risk
ALDH16A1	G	128	V	G128V	tcga/cbioportal	benign
ALDH16A1	R	129	Q	R129Q	cbioportal	benign
ALDH16A1	V	131	I	V131I	cosmics/cbioportal	cancer-risk
ALDH16A1	V	134	A	V134A	tcga/cbioportal	cancer-risk
ALDH16A1	D	136	E	D136E	tcga	cancer-risk
ALDH16A1	D	136	H	D136H	tcga/cbioportal	benign
ALDH16A1	D	136	N	D136N	tcga/cbioportal	cancer-risk
ALDH16A1	H	149	N	H149N	cosmics/cbioportal	cancer-risk
ALDH16A1	A	153	T	A153T	cosmics	benign
ALDH16A1	S	154	F	S154F	tcga/cbioportal	cancer-risk
ALDH16A1	Q	156	K	Q156K	cbioportal	benign
ALDH16A1	G	162	D	G162D	cosmics/cbioportal	cancer-risk
ALDH16A1	P	165	S	P165S	tcga/cbioportal	cancer-risk
ALDH16A1	M	166	I	M166I	cbioportal	cancer-risk
ALDH16A1	G	167	A	G167A	cosmics	benign
ALDH16A1	T	176	I	T176I	tcga/cbioportal	cancer-risk
ALDH16A1	S	178	F	S178F	cbioportal	cancer-risk
ALDH16A1	F	179	L	F179L	cbioportal	benign
ALDH16A1	C	187	F	C187F	cbioportal	cancer-risk
ALDH16A1	C	194	S	C194S	tcga/cbioportal	benign
ALDH16A1	C	194	Y	C194Y	tcga/cbioportal	benign
ALDH16A1	T	195	I	T195I	cbioportal	benign
ALDH16A1	P	201	S	P201S	cbioportal	cancer-risk
ALDH16A1	S	204	F	S204F	cosmics/cbioportal	cancer-risk
ALDH16A1	A	211	T	A211T	tcga/cbioportal	cancer-risk
ALDH16A1	G	215	A	G215A	cbioportal	benign
ALDH16A1	G	218	C	G218C	cbioportal	cancer-risk
ALDH16A1	P	219	H	P219H	cbioportal	benign
ALDH16A1	P	219	L	P219L	cbioportal	benign
ALDH16A1	L	227	V	L227V	cbioportal	benign
ALDH16A1	P	230	S	P230S	cbioportal	cancer-risk
ALDH16A1	P	235	S	P235S	cbioportal	cancer-risk
ALDH16A1	A	247	V	A247V	cbioportal	benign
ALDH16A1	P	252	S	P252S	cosmics/cbioportal	benign
ALDH16A1	R	256	C	R256C	cbioportal	benign
ALDH16A1	R	256	H	R256H	cbioportal	cancer-risk
ALDH16A1	A	257	D	A257D	cbioportal	cancer-risk
ALDH16A1	R	259	Q	R259Q	cbioportal	cancer-risk
ALDH16A1	A	263	V	A263V	cbioportal	benign
ALDH16A1	E	276	D	E276D	tcga/cbioportal	benign
ALDH16A1	D	283	N	D283N	cosmics	cancer-risk
ALDH16A1	D	288	Y	D288Y	tcga	cancer-risk
ALDH16A1	R	308	T	R308T	tcga/cbioportal	cancer-risk
ALDH16A1	S	314	Y	S314Y	tcga/cbioportal	benign
ALDH16A1	V	315	M	V315M	tcga/cbioportal	cancer-risk
ALDH16A1	E	325	K	E325K	cbioportal	cancer-risk
ALDH16A1	R	326	W	R326W	cbioportal	benign
ALDH16A1	M	327	L	M327L	tcga	cancer-risk
ALDH16A1	R	329	Q	R329Q	cbioportal	cancer-risk
ALDH16A1	R	329	W	R329W	cbioportal	benign
ALDH16A1	S	332	G	S332G	cbioportal	cancer-risk
ALDH16A1	R	334	Q	R334Q	cbioportal	cancer-risk
ALDH16A1	D	337	H	D337H	cosmics	cancer-risk
ALDH16A1	V	340	M	V340M	cbioportal	cancer-risk
ALDH16A1	G	343	V	G343V	tcga/cbioportal	cancer-risk
ALDH16A1	R	358	C	R358C	cosmics/tcga/cbioportal	cancer-risk
ALDH16A1	A	360	S	A360S	cbioportal	cancer-risk
ALDH16A1	Q	361	H	Q361H	cbioportal	cancer-risk
ALDH16A1	S	362	N	S362N	tcga/cbioportal	cancer-risk
ALDH16A1	D	372	N	D372N	cbioportal	benign
ALDH16A1	P	374	S	P374S	cbioportal	cancer-risk
ALDH16A1	S	375	L	S375L	cbioportal	cancer-risk
ALDH16A1	F	379	L	F379L	tcga/cbioportal	benign
ALDH16A1	P	381	S	P381S	cosmics/tcga/cbioportal	cancer-risk
ALDH16A1	P	382	L	P382L	cbioportal	cancer-risk
ALDH16A1	V	397	M	V397M	tcga/cbioportal	cancer-risk
ALDH16A1	P	400	L	P400L	cbioportal	benign
ALDH16A1	V	405	M	V405M	cbioportal	cancer-risk
ALDH16A1	P	408	F	P408F	cosmics/cbioportal	cancer-risk
ALDH16A1	G	421	E	G421E	tcga	cancer-risk
ALDH16A1	G	421	W	G421W	cbioportal	cancer-risk
ALDH16A1	P	423	S	P423S	tcga/cbioportal	cancer-risk
ALDH16A1	G	425	A	G425A	cbioportal	cancer-risk
ALDH16A1	G	426	D	G426D	cbioportal	cancer-risk
ALDH16A1	E	433	K	E433K	cbioportal	benign
ALDH16A1	G	436	W	G436W	tcga/cbioportal	cancer-risk
ALDH16A1	H	455	R	H455R	tcga	cancer-risk
ALDH16A1	S	461	L	S461L	cbioportal	cancer-risk
ALDH16A1	S	473	F	S473F	cosmics/tcga/cbioportal	cancer-risk
ALDH16A1	D	479	H	D479H	cbioportal	benign
ALDH16A1	D	479	Y	D479Y	tcga/cbioportal	cancer-risk
ALDH16A1	G	480	W	G480W	tcga/cbioportal	cancer-risk
ALDH16A1	L	481	M	L481M	cosmics	benign
ALDH16A1	E	483	D	E483D	tcga/cbioportal	cancer-risk
ALDH16A1	E	483	K	E483K	tcga/cbioportal	cancer-risk
ALDH16A1	P	487	L	P487L	cbioportal	benign
ALDH16A1	S	488	L	S488L	cbioportal	cancer-risk
ALDH16A1	C	496	F	C496F	tcga/cbioportal	benign
ALDH16A1	S	498	F	S498F	tcga/cbioportal	cancer-risk
ALDH16A1	Y	503	C	Y503C	cbioportal	benign
ALDH16A1	Y	503	F	Y503F	tcga/cbioportal	cancer-risk
ALDH16A1	P	511	S	P511S	tcga/cbioportal	cancer-risk
ALDH16A1	T	513	S	T513S	cbioportal	benign
ALDH16A1	E	519	K	E519K	cbioportal	benign
ALDH16A1	G	521	W	G521W	cbioportal	cancer-risk
ALDH16A1	S	523	I	S523I	tcga/cbioportal	cancer-risk
ALDH16A1	Y	528	C	Y528C	cbioportal	benign
ALDH16A1	G	529	V	G529V	cbioportal	cancer-risk
ALDH16A1	V	532	I	V532I	cbioportal	benign
ALDH16A1	R	535	C	R535C	cbioportal	benign
ALDH16A1	R	535	H	R535H	cbioportal	benign
ALDH16A1	A	538	D	A538D	cosmics	benign
ALDH16A1	P	539	H	P539H	cbioportal	cancer-risk
ALDH16A1	P	539	S	P539S	cosmics/cbioportal	cancer-risk
ALDH16A1	G	540	V	G540V	tcga	cancer-risk
ALDH16A1	R	542	Q	R542Q	cbioportal	cancer-risk
ALDH16A1	S	544	C	S544C	cosmics/cbioportal	benign
ALDH16A1	R	545	G	R545G	cbioportal	cancer-risk
ALDH16A1	I	547	N	I547N	tcga/cbioportal	cancer-risk
ALDH16A1	R	548	W	R548W	cbioportal	benign
ALDH16A1	G	561	S	G561S	tcga/cbioportal	benign
ALDH16A1	A	572	T	A572T	cbioportal	benign
ALDH16A1	A	572	V	A572V	cosmics	benign
ALDH16A1	Q	575	K	Q575K	cbioportal	benign
ALDH16A1	A	576	T	A576T	cosmics	benign
ALDH16A1	P	578	H	P578H	cbioportal	benign
ALDH16A1	G	579	V	G579V	cbioportal	cancer-risk
ALDH16A1	A	581	V	A581V	cbioportal	benign
ALDH16A1	S	608	L	S608L	cbioportal	benign
ALDH16A1	G	614	R	G614R	cosmics/cbioportal	cancer-risk
ALDH16A1	A	615	V	A615V	cbioportal	cancer-risk
ALDH16A1	R	629	G	R629G	cosmics	cancer-risk
ALDH16A1	A	633	T	A633T	cbioportal	benign
ALDH16A1	R	637	W	R637W	cbioportal	benign
ALDH16A1	Q	639	H	Q639H	tcga	benign
ALDH16A1	G	642	C	G642C	tcga	cancer-risk
ALDH16A1	Q	646	K	Q646K	tcga/cbioportal	benign
ALDH16A1	R	651	T	R651T	cbioportal	benign
ALDH16A1	G	652	S	G652S	cbioportal	benign
ALDH16A1	R	658	W	R658W	cbioportal	cancer-risk
ALDH16A1	E	659	D	E659D	cbioportal	benign
ALDH16A1	P	669	R	P669R	cosmics/cbioportal	benign
ALDH16A1	D	670	Y	D670Y	tcga/cbioportal	benign
ALDH16A1	L	674	Q	L674Q	cosmics/cbioportal	cancer-risk
ALDH16A1	V	678	M	V678M	cbioportal	cancer-risk
ALDH16A1	L	681	R	L681R	tcga/cbioportal	cancer-risk
ALDH16A1	A	684	T	A684T	cbioportal	cancer-risk
ALDH16A1	A	686	S	A686S	tcga/cbioportal	benign
ALDH16A1	T	690	S	T690S	tcga/cbioportal	cancer-risk
ALDH16A1	V	692	I	V692I	cosmics/tcga/cbioportal	cancer-risk
ALDH16A1	P	695	S	P695S	tcga	benign
ALDH16A1	A	697	V	A697V	cbioportal	cancer-risk
ALDH16A1	A	698	V	A698V	cbioportal	benign
ALDH16A1	L	702	M	L702M	tcga/cbioportal	benign
ALDH16A1	A	703	S	A703S	cbioportal	cancer-risk
ALDH16A1	A	703	V	A703V	tcga/cbioportal	cancer-risk
ALDH16A1	V	713	M	V713M	cbioportal	benign
ALDH16A1	P	715	S	P715S	cbioportal	cancer-risk
ALDH16A1	V	722	E	V722E	tcga/cbioportal	cancer-risk
ALDH16A1	T	723	I	T723I	tcga/cbioportal	benign
ALDH16A1	R	726	W	R726W	cbioportal	cancer-risk
ALDH16A1	T	730	I	T730I	tcga/cbioportal	benign
ALDH16A1	A	741	T	A741T	cbioportal	benign
ALDH16A1	M	742	I	M742I	tcga/cbioportal	cancer-risk
ALDH16A1	Y	744	H	Y744H	tcga/cbioportal	cancer-risk
ALDH16A1	G	750	V	G750V	cbioportal	cancer-risk
ALDH16A1	E	755	K	E755K	cbioportal	benign
ALDH16A1	P	772	L	P772L	cbioportal	cancer-risk
ALDH16A1	P	772	Q	P772Q	cbioportal	cancer-risk
ALDH16A1	R	773	G	R773G	cbioportal	benign
ALDH16A1	A	774	V	A774V	tcga/cbioportal	cancer-risk
ALDH16A1	A	779	V	A779V	tcga	cancer-risk
ALDH16A1	E	780	K	E780K	cbioportal	benign
ALDH16A1	A	782	G	A782G	cosmics/cbioportal	cancer-risk
ALDH16A1	P	784	L	P784L	cosmics	cancer-risk
ALDH16A1	L	788	Q	L788Q	tcga	benign
ALDH16A1	V	790	M	V790M	cbioportal	benign
ALDH16A1	A	791	V	A791V	cbioportal	benign
ALDH16A1	G	801	R	G801R	tcga/cbioportal	cancer-risk
ALDH18A1	Q	4	E	Q4E	cosmics	cancer-risk
ALDH18A1	C	8	G	C8G	cbioportal	cancer-risk
ALDH18A1	G	9	A	G9A	tcga	cancer-risk
ALDH18A1	Q	15	H	Q15H	cosmics	benign
ALDH18A1	H	30	Y	H30Y	cbioportal	cancer-risk
ALDH18A1	Q	33	R	Q33R	cbioportal	cancer-risk
ALDH18A1	V	36	L	V36L	cosmics	cancer-risk
ALDH18A1	S	42	F	S42F	tcga/cbioportal	cancer-risk
ALDH18A1	P	47	L	P47L	cbioportal	cancer-risk
ALDH18A1	P	47	S	P47S	cosmics/cbioportal	cancer-risk
ALDH18A1	V	51	I	V51I	cbioportal	benign
ALDH18A1	P	52	L	P52L	cosmics	benign
ALDH18A1	S	54	N	S54N	cbioportal	benign
ALDH18A1	R	55	C	R55C	tcga/cbioportal	benign
ALDH18A1	R	55	H	R55H	cbioportal	benign
ALDH18A1	T	56	A	T56A	tcga/cbioportal	benign
ALDH18A1	A	62	T	A62T	cbioportal	benign
ALDH18A1	R	64	H	R64H	cbioportal	cancer-risk
ALDH18A1	H	69	L	H69L	cosmics	cancer-risk
ALDH18A1	R	72	I	R72I	tcga/cbioportal	cancer-risk
ALDH18A1	V	74	M	V74M	cbioportal	cancer-risk
ALDH18A1	V	75	M	V75M	cbioportal	cancer-risk
ALDH18A1	K	76	R	K76R	tcga/cbioportal	benign
ALDH18A1	G	78	R	G78R	cbioportal	cancer-risk
ALDH18A1	G	78	S	G78S	cbioportal	cancer-risk
ALDH18A1	S	79	G	S79G	tcga/cbioportal	cancer-risk
ALDH18A1	A	80	G	A80G	tcga/cbioportal	cancer-risk
ALDH18A1	A	80	T	A80T	cosmics/cbioportal	cancer-risk
ALDH18A1	R	84	P	R84P	tcga/cbioportal	benign
ALDH18A1	D	86	N	D86N	cosmics	benign
ALDH18A1	C	88	Y	C88Y	cbioportal	benign
ALDH18A1	L	92	M	L92M	cbioportal	benign
ALDH18A1	L	92	V	L92V	tcga/cbioportal	benign
ALDH18A1	G	93	E	G93E	tcga/cbioportal	cancer-risk
ALDH18A1	G	93	W	G93W	tcga/cbioportal	cancer-risk
ALDH18A1	R	94	C	R94C	tcga/cbioportal	benign
ALDH18A1	Q	106	R	Q106R	tcga/cbioportal	cancer-risk
ALDH18A1	Q	108	K	Q108K	tcga	benign
ALDH18A1	E	111	K	E111K	cosmics	cancer-risk
ALDH18A1	M	112	L	M112L	cosmics/cbioportal	cancer-risk
ALDH18A1	A	119	T	A119T	cosmics/cbioportal	benign
ALDH18A1	V	120	I	V120I	cbioportal	benign
ALDH18A1	A	121	V	A121V	tcga/cbioportal	benign
ALDH18A1	R	126	C	R126C	tcga/cbioportal	cancer-risk
ALDH18A1	R	126	H	R126H	tcga/cbioportal	cancer-risk
ALDH18A1	R	128	C	R128C	tcga/cbioportal	cancer-risk
ALDH18A1	S	136	R	S136R	cbioportal	cancer-risk
ALDH18A1	S	143	L	S143L	cbioportal	cancer-risk
ALDH18A1	G	144	E	G144E	cbioportal	cancer-risk
ALDH18A1	L	148	M	L148M	cbioportal	benign
ALDH18A1	A	152	S	A152S	tcga/cbioportal	cancer-risk
ALDH18A1	C	161	R	C161R	tcga/cbioportal	benign
ALDH18A1	A	164	V	A164V	cosmics	benign
ALDH18A1	S	167	I	S167I	cbioportal	cancer-risk
ALDH18A1	G	168	W	G168W	cbioportal	cancer-risk
ALDH18A1	L	169	P	L169P	tcga/cbioportal	benign
ALDH18A1	M	170	I	M170I	cbioportal	benign
ALDH18A1	Q	179	K	Q179K	cbioportal	benign
ALDH18A1	C	183	Y	C183Y	cbioportal	benign
ALDH18A1	A	185	T	A185T	cosmics	benign
ALDH18A1	Q	186	K	Q186K	cosmics	benign
ALDH18A1	N	191	K	N191K	cbioportal	benign
ALDH18A1	F	194	C	F194C	cbioportal	benign
ALDH18A1	R	201	Q	R201Q	cbioportal	cancer-risk
ALDH18A1	L	211	F	L211F	tcga/cbioportal	cancer-risk
ALDH18A1	I	215	T	I215T	tcga/cbioportal	benign
ALDH18A1	V	216	I	V216I	tcga/cbioportal	cancer-risk
ALDH18A1	P	217	S	P217S	cbioportal	cancer-risk
ALDH18A1	T	221	R	T221R	cbioportal	benign
ALDH18A1	V	226	L	V226L	cbioportal	cancer-risk
ALDH18A1	P	228	T	P228T	cbioportal	benign
ALDH18A1	S	233	N	S233N	tcga/cbioportal	benign
ALDH18A1	G	237	E	G237E	cosmics	cancer-risk
ALDH18A1	V	238	L	V238L	cbioportal	benign
ALDH18A1	A	250	T	A250T	tcga/cbioportal	benign
ALDH18A1	A	251	S	A251S	cosmics	cancer-risk
ALDH18A1	L	265	F	L265F	cosmics	cancer-risk
ALDH18A1	D	267	V	D267V	tcga/cbioportal	cancer-risk
ALDH18A1	V	268	A	V268A	cbioportal	benign
ALDH18A1	E	269	G	E269G	cbioportal	cancer-risk
ALDH18A1	E	269	Q	E269Q	cbioportal	benign
ALDH18A1	L	271	F	L271F	cbioportal	cancer-risk
ALDH18A1	Y	288	F	Y288F	cosmics/cbioportal	benign
ALDH18A1	P	289	L	P289L	cbioportal	cancer-risk
ALDH18A1	P	289	S	P289S	cbioportal	cancer-risk
ALDH18A1	G	290	R	G290R	cbioportal	cancer-risk
ALDH18A1	G	298	E	G298E	tcga/cbioportal	cancer-risk
ALDH18A1	G	298	R	G298R	tcga/cbioportal	cancer-risk
ALDH18A1	G	307	V	G307V	tcga	cancer-risk
ALDH18A1	K	311	M	K311M	cosmics/cbioportal	benign
ALDH18A1	G	321	C	G321C	cbioportal	cancer-risk
ALDH18A1	V	326	F	V326F	cbioportal	benign
ALDH18A1	G	330	E	G330E	cbioportal	cancer-risk
ALDH18A1	E	345	Q	E345Q	tcga/cbioportal	cancer-risk
ALDH18A1	V	349	A	V349A	cbioportal	cancer-risk
ALDH18A1	F	353	L	F353L	tcga/cbioportal	benign
ALDH18A1	S	354	L	S354L	tcga	cancer-risk
ALDH18A1	P	361	H	P361H	cbioportal	benign
ALDH18A1	M	369	I	M369I	tcga/cbioportal	benign
ALDH18A1	A	370	T	A370T	tcga/cbioportal	benign
ALDH18A1	A	370	V	A370V	tcga/cbioportal	benign
ALDH18A1	R	375	M	R375M	tcga	cancer-risk
ALDH18A1	A	378	T	A378T	cbioportal	benign
ALDH18A1	A	378	V	A378V	tcga/cbioportal	benign
ALDH18A1	L	395	M	L395M	tcga/cbioportal	cancer-risk
ALDH18A1	R	400	H	R400H	cbioportal	cancer-risk
ALDH18A1	D	410	E	D410E	tcga/cbioportal	cancer-risk
ALDH18A1	D	410	Y	D410Y	tcga/cbioportal	cancer-risk
ALDH18A1	L	418	R	L418R	cbioportal	benign
ALDH18A1	A	437	S	A437S	cbioportal	cancer-risk
ALDH18A1	A	445	T	A445T	cosmics	benign
ALDH18A1	A	445	V	A445V	tcga/cbioportal	benign
ALDH18A1	R	456	C	R456C	cbioportal	cancer-risk
ALDH18A1	R	456	H	R456H	cbioportal	cancer-risk
ALDH18A1	L	464	F	L464F	cbioportal	cancer-risk
ALDH18A1	L	464	V	L464V	cbioportal	cancer-risk
ALDH18A1	P	472	S	P472S	cbioportal	cancer-risk
ALDH18A1	R	483	C	R483C	cbioportal	benign
ALDH18A1	R	483	H	R483H	cbioportal	benign
ALDH18A1	I	495	M	I495M	cosmics	benign
ALDH18A1	A	496	V	A496V	tcga/cbioportal	benign
ALDH18A1	G	500	S	G500S	cosmics	benign
ALDH18A1	G	505	E	G505E	cbioportal	cancer-risk
ALDH18A1	H	511	Q	H511Q	cbioportal	cancer-risk
ALDH18A1	R	514	Q	R514Q	cbioportal	cancer-risk
ALDH18A1	L	524	F	L524F	tcga	cancer-risk
ALDH18A1	H	527	Y	H527Y	cosmics/cbioportal	cancer-risk
ALDH18A1	V	529	L	V529L	tcga/cbioportal	cancer-risk
ALDH18A1	E	531	K	E531K	cosmics/cbioportal	cancer-risk
ALDH18A1	A	532	V	A532V	cbioportal	cancer-risk
ALDH18A1	Q	534	K	Q534K	cosmics	cancer-risk
ALDH18A1	E	541	G	E541G	cosmics	cancer-risk
ALDH18A1	E	541	Q	E541Q	cbioportal	cancer-risk
ALDH18A1	V	542	A	V542A	cbioportal	cancer-risk
ALDH18A1	D	544	Y	D544Y	tcga/cbioportal	cancer-risk
ALDH18A1	R	547	H	R547H	cbioportal	cancer-risk
ALDH18A1	I	556	V	I556V	tcga/cbioportal	benign
ALDH18A1	P	557	S	P557S	cosmics/cbioportal	cancer-risk
ALDH18A1	R	558	C	R558C	tcga/cbioportal	benign
ALDH18A1	Q	562	H	Q562H	cbioportal	cancer-risk
ALDH18A1	P	575	L	P575L	tcga/cbioportal	cancer-risk
ALDH18A1	P	575	S	P575S	cosmics	cancer-risk
ALDH18A1	M	577	I	M577I	cbioportal	benign
ALDH18A1	M	577	K	M577K	tcga	benign
ALDH18A1	M	586	R	M586R	cbioportal	cancer-risk
ALDH18A1	S	590	Y	S590Y	tcga/cbioportal	benign
ALDH18A1	E	591	K	E591K	cbioportal	cancer-risk
ALDH18A1	D	595	H	D595H	tcga/cbioportal	benign
ALDH18A1	R	602	I	R602I	tcga/cbioportal	cancer-risk
ALDH18A1	D	603	N	D603N	tcga/cbioportal	cancer-risk
ALDH18A1	D	603	V	D603V	cosmics/cbioportal	cancer-risk
ALDH18A1	D	603	Y	D603Y	cosmics/cbioportal	cancer-risk
ALDH18A1	A	610	T	A610T	cosmics	benign
ALDH18A1	F	630	C	F630C	cbioportal	benign
ALDH18A1	D	631	N	D631N	cbioportal	cancer-risk
ALDH18A1	R	638	K	R638K	cosmics	benign
ALDH18A1	R	638	S	R638S	cbioportal	cancer-risk
ALDH18A1	H	645	Y	H645Y	cosmics/tcga/cbioportal	cancer-risk
ALDH18A1	A	651	T	A651T	tcga/cbioportal	benign
ALDH18A1	S	652	F	S652F	cbioportal	cancer-risk
ALDH18A1	T	655	I	T655I	cbioportal	benign
ALDH18A1	R	665	Q	R665Q	cbioportal	cancer-risk
ALDH18A1	I	688	T	I688T	tcga/cbioportal	benign
ALDH18A1	G	692	D	G692D	tcga/cbioportal	benign
ALDH18A1	S	694	F	S694F	tcga/cbioportal	cancer-risk
ALDH18A1	T	696	A	T696A	cbioportal	benign
ALDH18A1	V	698	I	V698I	tcga/cbioportal	cancer-risk
ALDH18A1	E	702	G	E702G	cosmics	cancer-risk
ALDH18A1	V	714	A	V714A	cosmics	cancer-risk
ALDH18A1	S	716	R	S716R	cbioportal	cancer-risk
ALDH18A1	A	717	S	A717S	cosmics/cbioportal	cancer-risk
ALDH18A1	W	721	L	W721L	cbioportal	cancer-risk
ALDH18A1	A	723	D	A723D	cosmics	cancer-risk
ALDH18A1	R	726	S	R726S	cbioportal	cancer-risk
ALDH18A1	G	730	D	G730D	tcga/cbioportal	cancer-risk
ALDH18A1	R	732	C	R732C	cbioportal	benign
ALDH18A1	R	732	S	R732S	cbioportal	benign
ALDH18A1	R	745	I	R745I	cbioportal	benign
ALDH18A1	A	748	T	A748T	cbioportal	benign
ALDH18A1	E	755	Q	E755Q	cbioportal	benign
ALDH18A1	G	756	R	G756R	cbioportal	benign
ALDH18A1	S	775	L	S775L	tcga/cbioportal	cancer-risk
ALDH18A1	L	783	I	L783I	tcga/cbioportal	benign
ALDH18A1	L	787	F	L787F	cbioportal	benign
ALDH18A1	L	787	I	L787I	tcga/cbioportal	benign
ALDH18A1	P	790	L	P790L	cbioportal	cancer-risk
ALDH18A1	T	794	A	T794A	tcga/cbioportal	benign
ALDH1A1	S	4	A	S4A	tcga/cbioportal	benign
ALDH1A1	D	8	N	D8N	cbioportal	benign
ALDH1A1	L	9	F	L9F	cosmics	benign
ALDH1A1	V	11	D	V11D	tcga/cbioportal	cancer-risk
ALDH1A1	T	14	I	T14I	cosmics/cbioportal	benign
ALDH1A1	K	22	E	K22E	tcga/cbioportal	cancer-risk
ALDH1A1	D	31	N	D31N	cosmics	benign
ALDH1A1	G	35	C	G35C	cbioportal	cancer-risk
ALDH1A1	G	35	S	G35S	cbioportal	cancer-risk
ALDH1A1	P	39	A	P39A	cbioportal	benign
ALDH1A1	E	48	K	E48K	cosmics/cbioportal	cancer-risk
ALDH1A1	E	53	K	E53K	cbioportal	benign
ALDH1A1	G	55	E	G55E	tcga/cbioportal	cancer-risk
ALDH1A1	G	55	R	G55R	cbioportal	cancer-risk
ALDH1A1	D	56	N	D56N	tcga/cbioportal	cancer-risk
ALDH1A1	V	64	G	V64G	cbioportal	cancer-risk
ALDH1A1	V	64	M	V64M	cbioportal	cancer-risk
ALDH1A1	A	67	T	A67T	cbioportal	benign
ALDH1A1	Q	69	H	Q69H	cbioportal	benign
ALDH1A1	Q	72	H	Q72H	tcga	benign
ALDH1A1	G	74	E	G74E	cbioportal	cancer-risk
ALDH1A1	S	75	F	S75F	tcga/cbioportal	cancer-risk
ALDH1A1	P	76	Q	P76Q	cosmics	cancer-risk
ALDH1A1	P	76	S	P76S	cosmics/cbioportal	cancer-risk
ALDH1A1	S	83	F	S83F	cbioportal	cancer-risk
ALDH1A1	E	84	K	E84K	tcga/cbioportal	benign
ALDH1A1	R	85	G	R85G	tcga/cbioportal	benign
ALDH1A1	G	86	W	G86W	cbioportal	cancer-risk
ALDH1A1	Y	90	C	Y90C	tcga/cbioportal	cancer-risk
ALDH1A1	R	98	I	R98I	cbioportal	cancer-risk
ALDH1A1	D	99	N	D99N	tcga/cbioportal	cancer-risk
ALDH1A1	R	100	C	R100C	tcga/cbioportal	cancer-risk
ALDH1A1	L	101	M	L101M	tcga/cbioportal	cancer-risk
ALDH1A1	L	102	M	L102M	cosmics	cancer-risk
ALDH1A1	A	104	P	A104P	cbioportal	cancer-risk
ALDH1A1	A	104	V	A104V	tcga/cbioportal	benign
ALDH1A1	M	109	I	M109I	tcga/cbioportal	benign
ALDH1A1	M	109	T	M109T	tcga/cbioportal	benign
ALDH1A1	G	112	E	G112E	cbioportal	cancer-risk
ALDH1A1	I	127	V	I127V	cosmics	benign
ALDH1A1	G	135	C	G135C	cbioportal	cancer-risk
ALDH1A1	G	135	V	G135V	cosmics/cbioportal	cancer-risk
ALDH1A1	D	138	N	D138N	cosmics	benign
ALDH1A1	G	142	D	G142D	cbioportal	cancer-risk
ALDH1A1	T	144	A	T144A	cosmics/cbioportal	benign
ALDH1A1	P	146	S	P146S	cbioportal	cancer-risk
ALDH1A1	I	147	V	I147V	cbioportal	benign
ALDH1A1	D	148	N	D148N	cosmics	benign
ALDH1A1	F	151	C	F151C	tcga/cbioportal	benign
ALDH1A1	R	156	K	R156K	tcga/cbioportal	benign
ALDH1A1	H	157	N	H157N	cbioportal	benign
ALDH1A1	G	161	D	G161D	cosmics	cancer-risk
ALDH1A1	G	161	S	G161S	cosmics	cancer-risk
ALDH1A1	P	168	A	P168A	cbioportal	benign
ALDH1A1	F	171	V	F171V	cosmics	benign
ALDH1A1	P	172	R	P172R	cosmics	benign
ALDH1A1	P	172	T	P172T	cbioportal	benign
ALDH1A1	V	174	F	V174F	cosmics	benign
ALDH1A1	A	183	E	A183E	tcga/cbioportal	cancer-risk
ALDH1A1	L	184	P	L184P	cbioportal	cancer-risk
ALDH1A1	G	187	E	G187E	cosmics/cbioportal	cancer-risk
ALDH1A1	T	189	R	T189R	cosmics	cancer-risk
ALDH1A1	V	190	E	V190E	tcga/cbioportal	benign
ALDH1A1	V	191	A	V191A	tcga/cbioportal	benign
ALDH1A1	A	206	V	A206V	cosmics	benign
ALDH1A1	S	207	Y	S207Y	tcga/cbioportal	cancer-risk
ALDH1A1	P	215	S	P215S	cosmics/cbioportal	cancer-risk
ALDH1A1	P	223	H	P223H	cosmics	cancer-risk
ALDH1A1	G	224	S	G224S	cosmics	cancer-risk
ALDH1A1	S	235	F	S235F	cbioportal	cancer-risk
ALDH1A1	M	237	V	M237V	tcga/cbioportal	benign
ALDH1A1	D	238	N	D238N	cosmics/cbioportal	cancer-risk
ALDH1A1	K	241	T	K241T	tcga/cbioportal	benign
ALDH1A1	V	242	G	V242G	cbioportal	cancer-risk
ALDH1A1	F	244	S	F244S	cosmics/cbioportal	cancer-risk
ALDH1A1	G	246	R	G246R	cosmics/cbioportal	benign
ALDH1A1	E	249	D	E249D	tcga/cbioportal	cancer-risk
ALDH1A1	E	249	Q	E249Q	cosmics	cancer-risk
ALDH1A1	V	250	F	V250F	cbioportal	benign
ALDH1A1	G	251	D	G251D	tcga	cancer-risk
ALDH1A1	K	252	R	K252R	cbioportal	benign
ALDH1A1	L	253	F	L253F	cbioportal	benign
ALDH1A1	A	258	S	A258S	tcga/cbioportal	benign
ALDH1A1	G	259	R	G259R	cosmics/tcga/cbioportal	cancer-risk
ALDH1A1	L	263	M	L263M	cbioportal	benign
ALDH1A1	R	265	K	R265K	tcga	benign
ALDH1A1	G	271	R	G271R	cbioportal	cancer-risk
ALDH1A1	G	272	E	G272E	tcga/cbioportal	cancer-risk
ALDH1A1	K	273	T	K273T	tcga/cbioportal	cancer-risk
ALDH1A1	D	283	N	D283N	cosmics/cbioportal	cancer-risk
ALDH1A1	G	294	V	G294V	cosmics/cbioportal	cancer-risk
ALDH1A1	G	294	W	G294W	cosmics	benign
ALDH1A1	H	298	N	H298N	cbioportal	benign
ALDH1A1	I	304	V	I304V	tcga/cbioportal	benign
ALDH1A1	A	306	T	A306T	cbioportal	benign
ALDH1A1	S	307	Y	S307Y	cbioportal	cancer-risk
ALDH1A1	R	308	S	R308S	cbioportal	cancer-risk
ALDH1A1	I	309	T	I309T	tcga/cbioportal	benign
ALDH1A1	F	310	V	F310V	tcga/cbioportal	benign
ALDH1A1	E	312	K	E312K	cbioportal	cancer-risk
ALDH1A1	E	313	Q	E313Q	cbioportal	cancer-risk
ALDH1A1	R	322	K	R322K	cosmics/cbioportal	benign
ALDH1A1	G	333	E	G333E	cosmics/tcga/cbioportal	cancer-risk
ALDH1A1	P	335	L	P335L	tcga/cbioportal	cancer-risk
ALDH1A1	P	335	S	P335S	cbioportal	cancer-risk
ALDH1A1	I	358	T	I358T	cosmics	cancer-risk
ALDH1A1	E	359	Q	E359Q	cosmics/cbioportal	benign
ALDH1A1	E	364	K	E364K	cbioportal	cancer-risk
ALDH1A1	E	364	Q	E364Q	tcga/cbioportal	cancer-risk
ALDH1A1	G	365	R	G365R	tcga/cbioportal	cancer-risk
ALDH1A1	W	375	S	W375S	tcga/cbioportal	benign
ALDH1A1	G	376	V	G376V	cbioportal	cancer-risk
ALDH1A1	N	377	K	N377K	tcga/cbioportal	cancer-risk
ALDH1A1	G	379	V	G379V	tcga/cbioportal	cancer-risk
ALDH1A1	F	381	Y	F381Y	cosmics	benign
ALDH1A1	V	382	A	V382A	tcga/cbioportal	benign
ALDH1A1	P	384	H	P384H	tcga/cbioportal	benign
ALDH1A1	V	386	A	V386A	cbioportal	benign
ALDH1A1	N	389	K	N389K	tcga/cbioportal	benign
ALDH1A1	V	390	I	V390I	tcga	cancer-risk
ALDH1A1	E	393	K	E393K	cbioportal	cancer-risk
ALDH1A1	R	395	C	R395C	cbioportal	cancer-risk
ALDH1A1	R	395	H	R395H	cosmics/tcga/cbioportal	cancer-risk
ALDH1A1	K	398	N	K398N	cbioportal	cancer-risk
ALDH1A1	E	399	G	E399G	cbioportal	benign
ALDH1A1	E	399	Q	E399Q	tcga/cbioportal	cancer-risk
ALDH1A1	I	401	V	I401V	cosmics	benign
ALDH1A1	F	402	V	F402V	tcga/cbioportal	benign
ALDH1A1	P	404	Q	P404Q	cbioportal	cancer-risk
ALDH1A1	V	405	A	V405A	tcga/cbioportal	benign
ALDH1A1	M	409	T	M409T	cosmics/cbioportal	benign
ALDH1A1	L	414	S	L414S	cosmics	benign
ALDH1A1	V	417	A	V417A	cbioportal	cancer-risk
ALDH1A1	R	420	T	R420T	cosmics	cancer-risk
ALDH1A1	F	425	L	F425L	tcga/cbioportal	benign
ALDH1A1	G	427	A	G427A	cbioportal	benign
ALDH1A1	F	433	L	F433L	cbioportal	benign
ALDH1A1	K	435	T	K435T	tcga/cbioportal	cancer-risk
ALDH1A1	D	436	Y	D436Y	tcga/cbioportal	benign
ALDH1A1	I	443	V	I443V	cbioportal	cancer-risk
ALDH1A1	S	444	F	S444F	cosmics	cancer-risk
ALDH1A1	A	446	D	A446D	tcga/cbioportal	benign
ALDH1A1	V	452	M	V452M	tcga/cbioportal	benign
ALDH1A1	C	456	S	C456S	tcga/cbioportal	benign
ALDH1A1	G	458	D	G458D	tcga/cbioportal	cancer-risk
ALDH1A1	V	459	L	V459L	cbioportal	benign
ALDH1A1	Q	463	K	Q463K	cbioportal	benign
ALDH1A1	P	465	F	P465F	cosmics/cbioportal	cancer-risk
ALDH1A1	K	470	M	K470M	cbioportal	cancer-risk
ALDH1A1	G	473	A	G473A	cbioportal	benign
ALDH1A1	G	475	E	G475E	tcga/cbioportal	cancer-risk
ALDH1A1	R	476	K	R476K	tcga/cbioportal	benign
ALDH1A1	G	479	V	G479V	tcga/cbioportal	cancer-risk
ALDH1A1	F	483	L	F483L	cbioportal	cancer-risk
ALDH1A1	H	484	Y	H484Y	cosmics/cbioportal	benign
ALDH1A1	E	485	K	E485K	tcga/cbioportal	benign
ALDH1A1	Q	498	E	Q498E	cosmics/tcga/cbioportal	cancer-risk
ALDH1A1	K	499	N	K499N	tcga/cbioportal	cancer-risk
ALDH1A1	N	500	I	N500I	cosmics/cbioportal	cancer-risk
ALDH1A1	S	501	L	S501L	tcga/cbioportal	cancer-risk
ALDH1A2	P	16	S	P16S	cbioportal	cancer-risk
ALDH1A2	A	18	D	A18D	tcga/cbioportal	benign
ALDH1A2	A	18	T	A18T	tcga/cbioportal	benign
ALDH1A2	A	21	V	A21V	tcga/cbioportal	benign
ALDH1A2	S	22	L	S22L	tcga/cbioportal	cancer-risk
ALDH1A2	L	23	R	L23R	tcga/cbioportal	cancer-risk
ALDH1A2	H	24	L	H24L	tcga/cbioportal	benign
ALDH1A2	H	24	R	H24R	tcga/cbioportal	benign
ALDH1A2	L	25	V	L25V	cbioportal	benign
ALDH1A2	S	28	P	S28P	tcga/cbioportal	cancer-risk
ALDH1A2	P	31	A	P31A	cbioportal	cancer-risk
ALDH1A2	E	34	K	E34K	cbioportal	benign
ALDH1A2	Y	37	C	Y37C	tcga/cbioportal	benign
ALDH1A2	Y	37	S	Y37S	tcga	benign
ALDH1A2	I	40	N	I40N	cbioportal	cancer-risk
ALDH1A2	E	45	K	E45K	cbioportal	benign
ALDH1A2	W	46	R	W46R	tcga/cbioportal	benign
ALDH1A2	N	48	H	N48H	tcga/cbioportal	benign
ALDH1A2	N	48	T	N48T	cbioportal	benign
ALDH1A2	E	50	D	E50D	cbioportal	cancer-risk
ALDH1A2	G	52	V	G52V	cbioportal	cancer-risk
ALDH1A2	P	60	T	P60T	cbioportal	cancer-risk
ALDH1A2	A	61	T	A61T	tcga/cbioportal	benign
ALDH1A2	A	61	V	A61V	cbioportal	benign
ALDH1A2	G	63	E	G63E	cosmics	cancer-risk
ALDH1A2	G	63	R	G63R	cosmics	cancer-risk
ALDH1A2	Q	70	E	Q70E	cbioportal	cancer-risk
ALDH1A2	Q	70	R	Q70R	tcga/cbioportal	cancer-risk
ALDH1A2	D	73	H	D73H	tcga/cbioportal	benign
ALDH1A2	A	80	T	A80T	tcga	benign
ALDH1A2	A	83	E	A83E	cbioportal	cancer-risk
ALDH1A2	A	83	T	A83T	cosmics/cbioportal	benign
ALDH1A2	A	84	D	A84D	tcga	benign
ALDH1A2	R	85	G	R85G	cbioportal	benign
ALDH1A2	R	85	H	R85H	cbioportal	benign
ALDH1A2	F	88	L	F88L	tcga/cbioportal	benign
ALDH1A2	L	90	F	L90F	cosmics/cbioportal	benign
ALDH1A2	R	96	K	R96K	cbioportal	benign
ALDH1A2	M	97	I	M97I	tcga/cbioportal	benign
ALDH1A2	D	98	G	D98G	cbioportal	cancer-risk
ALDH1A2	R	102	K	R102K	cbioportal	cancer-risk
ALDH1A2	G	103	R	G103R	cbioportal	cancer-risk
ALDH1A2	R	104	H	R104H	cbioportal	benign
ALDH1A2	D	107	N	D107N	cbioportal	cancer-risk
ALDH1A2	D	111	N	D111N	tcga	cancer-risk
ALDH1A2	R	115	W	R115W	cbioportal	cancer-risk
ALDH1A2	L	120	F	L120F	tcga/cbioportal	cancer-risk
ALDH1A2	S	125	F	S125F	cbioportal	cancer-risk
ALDH1A2	K	130	R	K130R	tcga/cbioportal	benign
ALDH1A2	P	131	L	P131L	cosmics/cbioportal	cancer-risk
ALDH1A2	P	131	S	P131S	tcga/cbioportal	cancer-risk
ALDH1A2	L	133	M	L133M	tcga/cbioportal	benign
ALDH1A2	Q	134	K	Q134K	cbioportal	benign
ALDH1A2	Q	134	L	Q134L	cosmics	cancer-risk
ALDH1A2	A	135	T	A135T	tcga	benign
ALDH1A2	V	138	M	V138M	cosmics/cbioportal	benign
ALDH1A2	D	139	N	D139N	cosmics/cbioportal	benign
ALDH1A2	L	140	F	L140F	cosmics	cancer-risk
ALDH1A2	L	140	V	L140V	cosmics	cancer-risk
ALDH1A2	Q	141	H	Q141H	cbioportal	benign
ALDH1A2	G	142	D	G142D	tcga/cbioportal	benign
ALDH1A2	G	142	S	G142S	tcga/cbioportal	cancer-risk
ALDH1A2	V	143	I	V143I	cbioportal	benign
ALDH1A2	K	145	I	K145I	tcga/cbioportal	cancer-risk
ALDH1A2	R	148	Q	R148Q	cbioportal	cancer-risk
ALDH1A2	Y	150	N	Y150N	cosmics/cbioportal	cancer-risk
ALDH1A2	G	152	C	G152C	tcga/cbioportal	cancer-risk
ALDH1A2	G	152	S	G152S	tcga/cbioportal	benign
ALDH1A2	W	153	L	W153L	tcga/cbioportal	cancer-risk
ALDH1A2	D	155	Y	D155Y	tcga/cbioportal	cancer-risk
ALDH1A2	G	159	E	G159E	cosmics/cbioportal	cancer-risk
ALDH1A2	G	159	R	G159R	tcga/cbioportal	cancer-risk
ALDH1A2	T	161	I	T161I	cosmics/cbioportal	benign
ALDH1A2	P	163	L	P163L	tcga	cancer-risk
ALDH1A2	V	164	L	V164L	cosmics	benign
ALDH1A2	D	167	Y	D167Y	cosmics/tcga/cbioportal	cancer-risk
ALDH1A2	T	170	I	T170I	cbioportal	benign
ALDH1A2	T	170	S	T170S	cosmics	benign
ALDH1A2	R	173	I	R173I	cosmics/tcga/cbioportal	cancer-risk
ALDH1A2	R	173	K	R173K	tcga/cbioportal	benign
ALDH1A2	E	175	K	E175K	tcga/cbioportal	cancer-risk
ALDH1A2	Q	182	R	Q182R	tcga/cbioportal	cancer-risk
ALDH1A2	I	183	F	I183F	tcga/cbioportal	benign
ALDH1A2	I	183	M	I183M	tcga	benign
ALDH1A2	I	183	T	I183T	cbioportal	benign
ALDH1A2	P	189	L	P189L	cosmics/cbioportal	benign
ALDH1A2	M	192	K	M192K	cbioportal	benign
ALDH1A2	A	198	T	A198T	cosmics	benign
ALDH1A2	P	199	L	P199L	tcga/cbioportal	benign
ALDH1A2	V	208	I	V208I	cosmics/cbioportal	benign
ALDH1A2	E	213	Q	E213Q	tcga/cbioportal	benign
ALDH1A2	Q	214	R	Q214R	cosmics	cancer-risk
ALDH1A2	S	218	N	S218N	tcga/cbioportal	benign
ALDH1A2	A	219	E	A219E	tcga/cbioportal	cancer-risk
ALDH1A2	G	223	E	G223E	cbioportal	cancer-risk
ALDH1A2	G	223	R	G223R	cosmics/tcga/cbioportal	cancer-risk
ALDH1A2	L	225	R	L225R	tcga/cbioportal	cancer-risk
ALDH1A2	I	226	L	I226L	cosmics/cbioportal	benign
ALDH1A2	I	226	M	I226M	cbioportal	benign
ALDH1A2	E	228	K	E228K	cbioportal	cancer-risk
ALDH1A2	E	228	Q	E228Q	cosmics	benign
ALDH1A2	E	228	V	E228V	cosmics	cancer-risk
ALDH1A2	P	232	S	P232S	cosmics/cbioportal	cancer-risk
ALDH1A2	P	233	S	P233S	cosmics/cbioportal	cancer-risk
ALDH1A2	G	234	E	G234E	cosmics/tcga/cbioportal	cancer-risk
ALDH1A2	G	234	R	G234R	cbioportal	cancer-risk
ALDH1A2	G	234	V	G234V	cbioportal	cancer-risk
ALDH1A2	N	237	I	N237I	tcga/cbioportal	cancer-risk
ALDH1A2	G	241	E	G241E	cosmics/cbioportal	benign
ALDH1A2	G	241	R	G241R	cbioportal	cancer-risk
ALDH1A2	T	245	M	T245M	cbioportal	cancer-risk
ALDH1A2	A	246	T	A246T	cbioportal	cancer-risk
ALDH1A2	G	247	E	G247E	cosmics	cancer-risk
ALDH1A2	S	252	C	S252C	tcga/cbioportal	benign
ALDH1A2	D	257	E	D257E	cosmics/cbioportal	benign
ALDH1A2	K	258	N	K258N	cosmics/tcga/cbioportal	cancer-risk
ALDH1A2	K	258	Q	K258Q	tcga/cbioportal	cancer-risk
ALDH1A2	I	259	L	I259L	tcga/cbioportal	benign
ALDH1A2	F	261	Y	F261Y	cosmics	benign
ALDH1A2	E	266	K	E266K	tcga/cbioportal	cancer-risk
ALDH1A2	G	268	E	G268E	cbioportal	cancer-risk
ALDH1A2	L	270	V	L270V	cosmics/cbioportal	benign
ALDH1A2	E	273	K	E273K	cbioportal	benign
ALDH1A2	G	276	R	G276R	cbioportal	cancer-risk
ALDH1A2	R	282	S	R282S	tcga/cbioportal	cancer-risk
ALDH1A2	G	288	E	G288E	cosmics/cbioportal	cancer-risk
ALDH1A2	P	292	H	P292H	cbioportal	cancer-risk
ALDH1A2	P	292	L	P292L	tcga/cbioportal	cancer-risk
ALDH1A2	I	295	L	I295L	cbioportal	benign
ALDH1A2	I	295	S	I295S	cbioportal	cancer-risk
ALDH1A2	I	295	T	I295T	cbioportal	benign
ALDH1A2	D	298	Y	D298Y	tcga/cbioportal	benign
ALDH1A2	A	299	S	A299S	tcga/cbioportal	cancer-risk
ALDH1A2	E	306	K	E306K	cosmics	benign
ALDH1A2	A	308	V	A308V	tcga/cbioportal	benign
ALDH1A2	H	309	N	H309N	cosmics	benign
ALDH1A2	G	311	D	G311D	cbioportal	cancer-risk
ALDH1A2	F	313	L	F313L	tcga/cbioportal	benign
ALDH1A2	C	319	W	C319W	cbioportal	cancer-risk
ALDH1A2	R	325	C	R325C	cbioportal	benign
ALDH1A2	V	328	M	V328M	cbioportal	cancer-risk
ALDH1A2	E	329	K	E329K	cosmics	benign
ALDH1A2	E	335	G	E335G	cosmics	cancer-risk
ALDH1A2	E	335	Q	E335Q	cbioportal	cancer-risk
ALDH1A2	F	336	C	F336C	tcga/cbioportal	benign
ALDH1A2	R	338	K	R338K	cosmics/cbioportal	benign
ALDH1A2	R	338	T	R338T	tcga/cbioportal	cancer-risk
ALDH1A2	R	339	K	R339K	cosmics/cbioportal	benign
ALDH1A2	R	339	T	R339T	cosmics/cbioportal	cancer-risk
ALDH1A2	V	341	M	V341M	cbioportal	cancer-risk
ALDH1A2	R	343	Q	R343Q	cbioportal	cancer-risk
ALDH1A2	K	345	N	K345N	tcga/cbioportal	cancer-risk
ALDH1A2	R	347	C	R347C	cbioportal	cancer-risk
ALDH1A2	G	350	E	G350E	cbioportal	cancer-risk
ALDH1A2	P	352	A	P352A	tcga/cbioportal	cancer-risk
ALDH1A2	P	352	S	P352S	cbioportal	cancer-risk
ALDH1A2	P	355	T	P355T	tcga/cbioportal	cancer-risk
ALDH1A2	T	357	I	T357I	cbioportal	benign
ALDH1A2	K	365	N	K365N	cosmics	cancer-risk
ALDH1A2	N	369	D	N369D	tcga/cbioportal	cancer-risk
ALDH1A2	K	370	N	K370N	tcga/cbioportal	benign
ALDH1A2	E	373	K	E373K	cosmics/cbioportal	benign
ALDH1A2	V	379	L	V379L	cosmics	benign
ALDH1A2	A	380	V	A380V	cosmics	benign
ALDH1A2	E	386	A	E386A	tcga/cbioportal	cancer-risk
ALDH1A2	E	386	D	E386D	cbioportal	benign
ALDH1A2	G	389	A	G389A	cbioportal	benign
ALDH1A2	G	389	D	G389D	tcga/cbioportal	cancer-risk
ALDH1A2	G	391	E	G391E	cosmics/cbioportal	cancer-risk
ALDH1A2	R	394	Q	R394Q	cbioportal	cancer-risk
ALDH1A2	G	396	E	G396E	cosmics	cancer-risk
ALDH1A2	G	396	R	G396R	cosmics/cbioportal	cancer-risk
ALDH1A2	P	401	L	P401L	cosmics	benign
ALDH1A2	T	402	A	T402A	cbioportal	benign
ALDH1A2	V	403	L	V403L	tcga/cbioportal	benign
ALDH1A2	S	405	Y	S405Y	tcga/cbioportal	cancer-risk
ALDH1A2	D	409	N	D409N	cosmics/cbioportal	cancer-risk
ALDH1A2	R	412	W	R412W	cosmics/tcga/cbioportal	cancer-risk
ALDH1A2	K	415	N	K415N	tcga/cbioportal	cancer-risk
ALDH1A2	E	416	D	E416D	tcga/cbioportal	cancer-risk
ALDH1A2	E	416	K	E416K	cbioportal	cancer-risk
ALDH1A2	P	421	H	P421H	cbioportal	benign
ALDH1A2	Q	423	R	Q423R	tcga/cbioportal	cancer-risk
ALDH1A2	E	424	K	E424K	cosmics/tcga/cbioportal	cancer-risk
ALDH1A2	R	427	K	R427K	cosmics/cbioportal	cancer-risk
ALDH1A2	R	427	S	R427S	cosmics/cbioportal	cancer-risk
ALDH1A2	T	430	M	T430M	cbioportal	benign
ALDH1A2	T	430	R	T430R	cosmics	cancer-risk
ALDH1A2	M	431	I	M431I	tcga/cbioportal	cancer-risk
ALDH1A2	E	433	K	E433K	cbioportal	cancer-risk
ALDH1A2	N	439	S	N439S	cbioportal	benign
ALDH1A2	G	444	E	G444E	cbioportal	cancer-risk
ALDH1A2	G	444	V	G444V	cbioportal	benign
ALDH1A2	V	446	A	V446A	cosmics/tcga	benign
ALDH1A2	V	460	L	V460L	tcga/cbioportal	benign
ALDH1A2	S	461	F	S461F	cbioportal	cancer-risk
ALDH1A2	S	462	F	S462F	cosmics/cbioportal	cancer-risk
ALDH1A2	G	467	E	G467E	cbioportal	cancer-risk
ALDH1A2	A	476	V	A476V	tcga/cbioportal	benign
ALDH1A2	A	479	T	A479T	tcga/cbioportal	benign
ALDH1A2	Q	480	K	Q480K	tcga/cbioportal	benign
ALDH1A2	S	481	N	S481N	tcga/cbioportal	benign
ALDH1A2	P	482	L	P482L	tcga/cbioportal	cancer-risk
ALDH1A2	G	484	E	G484E	cbioportal	benign
ALDH1A2	G	485	E	G485E	cbioportal	cancer-risk
ALDH1A2	F	486	S	F486S	cosmics	cancer-risk
ALDH1A2	K	487	M	K487M	tcga	cancer-risk
ALDH1A2	G	490	E	G490E	cosmics/cbioportal	cancer-risk
ALDH1A2	G	492	R	G492R	cosmics/tcga/cbioportal	cancer-risk
ALDH1A2	E	494	K	E494K	cbioportal	benign
ALDH1A2	M	495	I	M495I	tcga/cbioportal	cancer-risk
ALDH1A2	M	495	K	M495K	tcga/cbioportal	cancer-risk
ALDH1A2	G	496	E	G496E	cbioportal	cancer-risk
ALDH1A2	G	496	R	G496R	cosmics/cbioportal	cancer-risk
ALDH1A2	E	505	K	E505K	tcga/cbioportal	benign
ALDH1A2	E	505	Q	E505Q	cbioportal	cancer-risk
ALDH1A2	T	508	M	T508M	cosmics	benign
ALDH1A2	V	509	M	V509M	cosmics/cbioportal	benign
ALDH1A2	K	512	N	K512N	cosmics	cancer-risk
ALDH1A2	P	514	L	P514L	cbioportal	cancer-risk
ALDH1A3	E	9	D	E9D	tcga	benign
ALDH1A3	P	18	L	P18L	cbioportal	cancer-risk
ALDH1A3	P	18	R	P18R	cbioportal	benign
ALDH1A3	E	28	Q	E28Q	cbioportal	benign
ALDH1A3	K	33	N	K33N	tcga	benign
ALDH1A3	K	44	N	K44N	tcga/cbioportal	cancer-risk
ALDH1A3	K	47	E	K47E	tcga/cbioportal	cancer-risk
ALDH1A3	T	51	I	T51I	tcga/cbioportal	cancer-risk
ALDH1A3	E	58	G	E58G	tcga/cbioportal	cancer-risk
ALDH1A3	E	58	K	E58K	tcga/cbioportal	benign
ALDH1A3	Q	59	L	Q59L	cosmics/cbioportal	cancer-risk
ALDH1A3	V	63	L	V63L	cbioportal	cancer-risk
ALDH1A3	P	69	L	P69L	cbioportal	benign
ALDH1A3	A	74	V	A74V	cbioportal	benign
ALDH1A3	E	76	K	E76K	tcga	benign
ALDH1A3	Q	79	H	Q79H	tcga/cbioportal	benign
ALDH1A3	A	81	F	A81F	cbioportal	benign
ALDH1A3	A	81	T	A81T	tcga/cbioportal	benign
ALDH1A3	A	81	V	A81V	cbioportal	benign
ALDH1A3	S	86	L	S86L	cosmics/tcga/cbioportal	cancer-risk
ALDH1A3	W	88	C	W88C	cosmics	benign
ALDH1A3	R	98	W	R98W	cbioportal	benign
ALDH1A3	A	104	T	A104T	cbioportal	cancer-risk
ALDH1A3	E	108	K	E108K	cbioportal	cancer-risk
ALDH1A3	L	114	F	L114F	tcga/cbioportal	cancer-risk
ALDH1A3	A	116	V	A116V	cbioportal	cancer-risk
ALDH1A3	T	119	M	T119M	cbioportal	cancer-risk
ALDH1A3	P	125	R	P125R	cbioportal	benign
ALDH1A3	F	126	C	F126C	tcga/cbioportal	cancer-risk
ALDH1A3	F	126	I	F126I	tcga/cbioportal	cancer-risk
ALDH1A3	L	127	F	L127F	cbioportal	cancer-risk
ALDH1A3	F	130	C	F130C	tcga/cbioportal	cancer-risk
ALDH1A3	E	135	D	E135D	tcga/cbioportal	benign
ALDH1A3	F	144	S	F144S	tcga/cbioportal	cancer-risk
ALDH1A3	G	146	V	G146V	tcga/cbioportal	cancer-risk
ALDH1A3	G	146	W	G146W	tcga/cbioportal	benign
ALDH1A3	W	147	R	W147R	tcga/cbioportal	cancer-risk
ALDH1A3	D	149	E	D149E	cosmics/cbioportal	benign
ALDH1A3	D	159	Y	D159Y	tcga/cbioportal	cancer-risk
ALDH1A3	N	161	S	N161S	cbioportal	benign
ALDH1A3	F	165	I	F165I	tcga/cbioportal	benign
ALDH1A3	A	176	V	A176V	cbioportal	benign
ALDH1A3	P	179	S	P179S	cbioportal	benign
ALDH1A3	F	182	V	F182V	tcga/cbioportal	cancer-risk
ALDH1A3	L	187	M	L187M	tcga/cbioportal	benign
ALDH1A3	A	192	T	A192T	cbioportal	benign
ALDH1A3	P	193	L	P193L	cbioportal	benign
ALDH1A3	A	194	T	A194T	cbioportal	benign
ALDH1A3	C	197	W	C197W	tcga/cbioportal	cancer-risk
ALDH1A3	M	201	V	M201V	cosmics/cbioportal	benign
ALDH1A3	V	202	F	V202F	cbioportal	benign
ALDH1A3	P	205	L	P205L	cbioportal	cancer-risk
ALDH1A3	P	205	S	P205S	cbioportal	cancer-risk
ALDH1A3	A	206	T	A206T	cosmics	cancer-risk
ALDH1A3	A	206	V	A206V	cosmics/cbioportal	cancer-risk
ALDH1A3	L	211	F	L211F	cbioportal	benign
ALDH1A3	A	213	T	A213T	cbioportal	benign
ALDH1A3	G	217	D	G217D	cbioportal	cancer-risk
ALDH1A3	G	224	R	G224R	cbioportal	cancer-risk
ALDH1A3	P	226	S	P226S	tcga/cbioportal	cancer-risk
ALDH1A3	G	228	E	G228E	cosmics/cbioportal	cancer-risk
ALDH1A3	G	241	R	G241R	tcga	cancer-risk
ALDH1A3	S	245	F	S245F	cbioportal	cancer-risk
ALDH1A3	S	245	Y	S245Y	cbioportal	cancer-risk
ALDH1A3	P	248	H	P248H	cbioportal	benign
ALDH1A3	Q	249	H	Q249H	tcga/cbioportal	benign
ALDH1A3	N	251	D	N251D	tcga/cbioportal	benign
ALDH1A3	E	260	D	E260D	tcga/cbioportal	cancer-risk
ALDH1A3	E	260	K	E260K	cosmics/cbioportal	benign
ALDH1A3	E	260	Q	E260Q	cbioportal	cancer-risk
ALDH1A3	G	262	E	G262E	cbioportal	cancer-risk
ALDH1A3	R	271	Q	R271Q	cbioportal	cancer-risk
ALDH1A3	R	276	W	R276W	cosmics	cancer-risk
ALDH1A3	T	278	M	T278M	cbioportal	benign
ALDH1A3	G	283	E	G283E	cbioportal	benign
ALDH1A3	P	286	H	P286H	cbioportal	cancer-risk
ALDH1A3	P	286	R	P286R	tcga/cbioportal	cancer-risk
ALDH1A3	A	291	V	A291V	cbioportal	cancer-risk
ALDH1A3	D	292	E	D292E	tcga/cbioportal	benign
ALDH1A3	A	293	T	A293T	tcga/cbioportal	cancer-risk
ALDH1A3	Q	304	H	Q304H	cosmics	benign
ALDH1A3	N	309	H	N309H	cbioportal	benign
ALDH1A3	S	318	C	S318C	cosmics/cbioportal	benign
ALDH1A3	R	333	G	R333G	cbioportal	cancer-risk
ALDH1A3	R	333	L	R333L	cbioportal	cancer-risk
ALDH1A3	S	334	T	S334T	tcga/cbioportal	cancer-risk
ALDH1A3	V	335	M	V335M	cbioportal	benign
ALDH1A3	E	336	G	E336G	cbioportal	benign
ALDH1A3	Y	337	D	Y337D	cbioportal	benign
ALDH1A3	A	338	D	A338D	tcga/cbioportal	cancer-risk
ALDH1A3	A	338	T	A338T	tcga/cbioportal	benign
ALDH1A3	R	341	L	R341L	tcga/cbioportal	cancer-risk
ALDH1A3	R	341	Q	R341Q	cosmics	cancer-risk
ALDH1A3	G	344	V	G344V	cbioportal	cancer-risk
ALDH1A3	D	348	N	D348N	cbioportal	benign
ALDH1A3	G	354	V	G354V	tcga/cbioportal	cancer-risk
ALDH1A3	P	355	L	P355L	cosmics/tcga	benign
ALDH1A3	P	355	S	P355S	cosmics/cbioportal	cancer-risk
ALDH1A3	D	358	H	D358H	cbioportal	cancer-risk
ALDH1A3	D	363	N	D363N	cbioportal	cancer-risk
ALDH1A3	K	364	R	K364R	cbioportal	benign
ALDH1A3	G	372	R	G372R	cbioportal	benign
ALDH1A3	G	376	R	G376R	cosmics/tcga/cbioportal	cancer-risk
ALDH1A3	G	382	R	G382R	cosmics	cancer-risk
ALDH1A3	M	386	V	M386V	cbioportal	benign
ALDH1A3	L	391	F	L391F	cosmics/cbioportal	benign
ALDH1A3	L	391	I	L391I	tcga	benign
ALDH1A3	V	397	F	V397F	tcga/cbioportal	benign
ALDH1A3	E	400	K	E400K	cbioportal	benign
ALDH1A3	A	408	V	A408V	cosmics	cancer-risk
ALDH1A3	E	410	D	E410D	tcga/cbioportal	cancer-risk
ALDH1A3	I	412	M	I412M	tcga/cbioportal	benign
ALDH1A3	G	414	E	G414E	cbioportal	cancer-risk
ALDH1A3	P	418	S	P418S	cbioportal	cancer-risk
ALDH1A3	I	419	M	I419M	cbioportal	benign
ALDH1A3	L	420	M	L420M	tcga/cbioportal	cancer-risk
ALDH1A3	F	422	L	F422L	tcga/cbioportal	cancer-risk
ALDH1A3	E	426	K	E426K	cbioportal	cancer-risk
ALDH1A3	V	428	M	V428M	tcga/cbioportal	cancer-risk
ALDH1A3	K	430	T	K430T	tcga/cbioportal	cancer-risk
ALDH1A3	S	434	N	S434N	cosmics/cbioportal	cancer-risk
ALDH1A3	L	439	I	L439I	cbioportal	benign
ALDH1A3	A	441	V	A441V	tcga/cbioportal	benign
ALDH1A3	L	448	F	L448F	cbioportal	cancer-risk
ALDH1A3	L	448	I	L448I	tcga/cbioportal	cancer-risk
ALDH1A3	D	449	N	D449N	cbioportal	cancer-risk
ALDH1A3	A	457	V	A457V	tcga/cbioportal	benign
ALDH1A3	I	465	M	I465M	cosmics	benign
ALDH1A3	Y	468	N	Y468N	cbioportal	benign
ALDH1A3	P	476	L	P476L	cosmics	cancer-risk
ALDH1A3	G	478	V	G478V	cosmics/cbioportal	cancer-risk
ALDH1A3	K	481	T	K481T	tcga	cancer-risk
ALDH1A3	N	485	H	N485H	tcga/cbioportal	benign
ALDH1A3	A	493	D	A493D	tcga/cbioportal	cancer-risk
ALDH1A3	A	493	V	A493V	tcga/cbioportal	benign
ALDH1A3	T	498	I	T498I	cbioportal	benign
ALDH1A3	G	508	C	G508C	cbioportal	cancer-risk
ALDH1B1	R	3	H	R3H	cbioportal	benign
ALDH1B1	R	3	L	R3L	tcga/cbioportal	benign
ALDH1B1	P	7	S	P7S	cbioportal	cancer-risk
ALDH1B1	R	8	L	R8L	tcga/cbioportal	benign
ALDH1B1	R	8	Q	R8Q	cbioportal	cancer-risk
ALDH1B1	L	12	F	L12F	cosmics/cbioportal	benign
ALDH1B1	R	15	K	R15K	cosmics/cbioportal	benign
ALDH1B1	A	17	T	A17T	cbioportal	benign
ALDH1B1	R	18	S	R18S	tcga/cbioportal	benign
ALDH1B1	Y	19	C	Y19C	tcga/cbioportal	benign
ALDH1B1	Y	19	H	Y19H	tcga	benign
ALDH1B1	S	21	P	S21P	cbioportal	cancer-risk
ALDH1B1	A	22	T	A22T	cosmics	benign
ALDH1B1	L	25	I	L25I	cbioportal	benign
ALDH1B1	L	30	V	L30V	tcga/cbioportal	benign
ALDH1B1	P	32	S	P32S	cosmics/cbioportal	cancer-risk
ALDH1B1	P	35	F	P35F	cosmics	cancer-risk
ALDH1B1	P	35	S	P35S	tcga/cbioportal	cancer-risk
ALDH1B1	F	40	L	F40L	tcga/cbioportal	benign
ALDH1B1	N	43	H	N43H	cosmics	cancer-risk
ALDH1B1	D	47	N	D47N	tcga/cbioportal	cancer-risk
ALDH1B1	K	51	N	K51N	cbioportal	cancer-risk
ALDH1B1	T	53	N	T53N	cosmics	cancer-risk
ALDH1B1	T	56	M	T56M	cbioportal	benign
ALDH1B1	V	57	F	V57F	tcga/cbioportal	benign
ALDH1B1	N	58	S	N58S	cbioportal	benign
ALDH1B1	P	59	R	P59R	cbioportal	cancer-risk
ALDH1B1	T	60	N	T60N	tcga/cbioportal	benign
ALDH1B1	E	63	K	E63K	tcga/cbioportal	benign
ALDH1B1	V	64	F	V64F	cbioportal	benign
ALDH1B1	H	67	L	H67L	tcga/cbioportal	cancer-risk
ALDH1B1	H	67	Y	H67Y	cbioportal	benign
ALDH1B1	V	68	M	V68M	cbioportal	cancer-risk
ALDH1B1	D	75	G	D75G	tcga/cbioportal	cancer-risk
ALDH1B1	D	75	Y	D75Y	tcga/cbioportal	benign
ALDH1B1	R	78	Q	R78Q	cbioportal	cancer-risk
ALDH1B1	K	81	R	K81R	tcga	benign
ALDH1B1	R	84	W	R84W	cbioportal	benign
ALDH1B1	E	85	K	E85K	cbioportal	cancer-risk
ALDH1B1	A	86	D	A86D	cbioportal	cancer-risk
ALDH1B1	A	86	T	A86T	tcga/cbioportal	benign
ALDH1B1	A	86	V	A86V	cbioportal	benign
ALDH1B1	R	88	C	R88C	cbioportal	benign
ALDH1B1	R	88	L	R88L	cosmics	benign
ALDH1B1	S	91	F	S91F	cosmics/tcga/cbioportal	cancer-risk
ALDH1B1	M	96	I	M96I	tcga	benign
ALDH1B1	R	101	L	R101L	tcga/cbioportal	benign
ALDH1B1	R	101	W	R101W	cbioportal	benign
ALDH1B1	G	102	S	G102S	tcga	cancer-risk
ALDH1B1	R	103	Q	R103Q	cbioportal	cancer-risk
ALDH1B1	R	103	W	R103W	cbioportal	benign
ALDH1B1	L	105	V	L105V	cosmics/cbioportal	benign
ALDH1B1	R	107	C	R107C	cbioportal	benign
ALDH1B1	R	107	S	R107S	cbioportal	benign
ALDH1B1	R	116	P	R116P	cbioportal	cancer-risk
ALDH1B1	T	124	P	T124P	tcga/cbioportal	benign
ALDH1B1	G	128	R	G128R	tcga/cbioportal	benign
ALDH1B1	K	129	N	K129N	tcga/cbioportal	cancer-risk
ALDH1B1	P	130	H	P130H	tcga/cbioportal	benign
ALDH1B1	P	130	L	P130L	tcga/cbioportal	benign
ALDH1B1	F	131	Y	F131Y	cosmics/cbioportal	benign
ALDH1B1	S	134	P	S134P	cbioportal	benign
ALDH1B1	D	140	G	D140G	tcga/cbioportal	benign
ALDH1B1	R	147	Q	R147Q	cbioportal	cancer-risk
ALDH1B1	R	147	W	R147W	cbioportal	benign
ALDH1B1	A	150	P	A150P	cbioportal	cancer-risk
ALDH1B1	T	160	I	T160I	cbioportal	benign
ALDH1B1	D	164	N	D164N	cbioportal	benign
ALDH1B1	Q	166	H	Q166H	tcga/cbioportal	benign
ALDH1B1	F	168	L	F168L	tcga/cbioportal	benign
ALDH1B1	H	173	R	H173R	cbioportal	cancer-risk
ALDH1B1	E	174	A	E174A	cosmics/tcga/cbioportal	cancer-risk
ALDH1B1	Q	181	R	Q181R	tcga/cbioportal	cancer-risk
ALDH1B1	P	184	S	P184S	cosmics/cbioportal	benign
ALDH1B1	N	186	K	N186K	cosmics	cancer-risk
ALDH1B1	F	187	V	F187V	tcga/cbioportal	cancer-risk
ALDH1B1	Q	192	E	Q192E	tcga/cbioportal	benign
ALDH1B1	P	198	Q	P198Q	tcga/cbioportal	cancer-risk
ALDH1B1	A	199	T	A199T	tcga/cbioportal	benign
ALDH1B1	L	200	R	L200R	cosmics/cbioportal	cancer-risk
ALDH1B1	A	201	T	A201T	cbioportal	benign
ALDH1B1	V	207	F	V207F	cbioportal	benign
ALDH1B1	A	218	S	A218S	cosmics/cbioportal	benign
ALDH1B1	K	226	N	K226N	tcga/cbioportal	cancer-risk
ALDH1B1	P	231	S	P231S	cbioportal	cancer-risk
ALDH1B1	V	235	A	V235A	tcga/cbioportal	benign
ALDH1B1	N	236	D	N236D	cbioportal	benign
ALDH1B1	I	238	V	I238V	tcga/cbioportal	cancer-risk
ALDH1B1	T	239	M	T239M	cbioportal	cancer-risk
ALDH1B1	G	240	E	G240E	cbioportal	benign
ALDH1B1	A	250	T	A250T	cbioportal	benign
ALDH1B1	Q	251	E	Q251E	tcga	benign
ALDH1B1	K	257	R	K257R	tcga/cbioportal	benign
ALDH1B1	S	263	Y	S263Y	cbioportal	cancer-risk
ALDH1B1	E	265	K	E265K	cbioportal	benign
ALDH1B1	V	266	A	V266A	tcga/cbioportal	benign
ALDH1B1	G	275	D	G275D	tcga/cbioportal	cancer-risk
ALDH1B1	G	275	V	G275V	cbioportal	cancer-risk
ALDH1B1	R	281	K	R281K	tcga/cbioportal	benign
ALDH1B1	T	283	I	T283I	cosmics/cbioportal	benign
ALDH1B1	G	287	S	G287S	cbioportal	cancer-risk
ALDH1B1	S	290	T	S290T	tcga/cbioportal	benign
ALDH1B1	P	291	H	P291H	cbioportal	benign
ALDH1B1	A	296	T	A296T	tcga/cbioportal	cancer-risk
ALDH1B1	G	316	S	G316S	cbioportal	benign
ALDH1B1	C	318	Y	C318Y	cosmics	benign
ALDH1B1	A	321	T	A321T	cbioportal	benign
ALDH1B1	S	323	F	S323F	tcga/cbioportal	cancer-risk
ALDH1B1	N	333	I	N333I	cosmics/cbioportal	cancer-risk
ALDH1B1	E	337	K	E337K	cbioportal	cancer-risk
ALDH1B1	A	343	E	A343E	cbioportal	benign
ALDH1B1	R	346	K	R346K	cosmics	cancer-risk
ALDH1B1	G	349	V	G349V	tcga/cbioportal	cancer-risk
ALDH1B1	P	351	R	P351R	tcga/cbioportal	benign
ALDH1B1	E	353	Q	E353Q	tcga/cbioportal	benign
ALDH1B1	Q	361	K	Q361K	cbioportal	benign
ALDH1B1	Q	361	R	Q361R	cbioportal	cancer-risk
ALDH1B1	V	362	L	V362L	tcga/cbioportal	cancer-risk
ALDH1B1	R	369	Q	R369Q	cbioportal	cancer-risk
ALDH1B1	G	377	D	G377D	tcga/cbioportal	cancer-risk
ALDH1B1	Q	378	H	Q378H	tcga/cbioportal	benign
ALDH1B1	G	381	D	G381D	tcga/cbioportal	cancer-risk
ALDH1B1	A	382	T	A382T	cbioportal	benign
ALDH1B1	L	385	P	L385P	cosmics/cbioportal	cancer-risk
ALDH1B1	G	388	R	G388R	cbioportal	cancer-risk
ALDH1B1	R	390	H	R390H	cbioportal	cancer-risk
ALDH1B1	G	392	E	G392E	cosmics/cbioportal	cancer-risk
ALDH1B1	G	392	W	G392W	cbioportal	cancer-risk
ALDH1B1	R	394	C	R394C	cbioportal	cancer-risk
ALDH1B1	G	404	S	G404S	tcga/cbioportal	benign
ALDH1B1	D	409	N	D409N	cbioportal	cancer-risk
ALDH1B1	R	411	I	R411I	tcga/cbioportal	cancer-risk
ALDH1B1	A	413	V	A413V	cbioportal	cancer-risk
ALDH1B1	F	418	C	F418C	tcga/cbioportal	cancer-risk
ALDH1B1	Q	422	H	Q422H	cosmics	benign
ALDH1B1	P	423	L	P423L	cbioportal	benign
ALDH1B1	K	428	N	K428N	tcga/cbioportal	cancer-risk
ALDH1B1	E	435	D	E435D	cbioportal	cancer-risk
ALDH1B1	Y	442	H	Y442H	tcga/cbioportal	cancer-risk
ALDH1B1	G	443	D	G443D	cbioportal	benign
ALDH1B1	A	446	V	A446V	cbioportal	benign
ALDH1B1	R	451	L	R451L	cbioportal	cancer-risk
ALDH1B1	D	454	Y	D454Y	tcga/cbioportal	cancer-risk
ALDH1B1	G	466	R	G466R	cbioportal	cancer-risk
ALDH1B1	T	467	A	T467A	cosmics	benign
ALDH1B1	Y	473	C	Y473C	cbioportal	benign
ALDH1B1	T	480	M	T480M	cbioportal	cancer-risk
ALDH1B1	T	480	R	T480R	cbioportal	cancer-risk
ALDH1B1	P	481	S	P481S	tcga/cbioportal	benign
ALDH1B1	F	485	L	F485L	tcga/cbioportal	benign
ALDH1B1	E	487	G	E487G	cbioportal	benign
ALDH1B1	E	487	K	E487K	cbioportal	cancer-risk
ALDH1B1	N	490	H	N490H	cosmics	benign
ALDH1B1	G	491	R	G491R	cbioportal	cancer-risk
ALDH1B1	D	497	E	D497E	tcga/cbioportal	cancer-risk
ALDH1B1	G	498	E	G498E	cosmics	benign
ALDH1B1	Y	502	H	Y502H	tcga/cbioportal	benign
ALDH1B1	T	507	M	T507M	cbioportal	benign
ALDH1B1	T	509	I	T509I	cbioportal	benign
ALDH1B1	K	511	M	K511M	cbioportal	benign
ALDH1B1	V	512	I	V512I	cosmics/cbioportal	benign
ALDH1B1	P	513	H	P513H	cbioportal	cancer-risk
ALDH1B1	S	517	L	S517L	cbioportal	cancer-risk
ALDH1L1	Q	8	L	Q8L	cbioportal	cancer-risk
ALDH1L1	L	19	M	L19M	cbioportal	benign
ALDH1L1	G	23	S	G23S	cosmics	cancer-risk
ALDH1L1	E	25	K	E25K	cosmics/cbioportal	benign
ALDH1L1	P	33	A	P33A	cbioportal	benign
ALDH1L1	A	39	V	A39V	cbioportal	cancer-risk
ALDH1L1	D	40	N	D40N	cbioportal	cancer-risk
ALDH1L1	D	40	Y	D40Y	cbioportal	benign
ALDH1L1	G	43	C	G43C	cbioportal	cancer-risk
ALDH1L1	E	45	K	E45K	cbioportal	cancer-risk
ALDH1L1	A	46	S	A46S	cbioportal	cancer-risk
ALDH1L1	D	49	A	D49A	cbioportal	benign
ALDH1L1	P	52	S	P52S	cbioportal	cancer-risk
ALDH1L1	Y	56	H	Y56H	cosmics	benign
ALDH1L1	R	58	Q	R58Q	cosmics	cancer-risk
ALDH1L1	A	61	T	A61T	cbioportal	benign
ALDH1L1	G	63	R	G63R	cosmics	cancer-risk
ALDH1L1	G	63	V	G63V	cbioportal	cancer-risk
ALDH1L1	L	66	F	L66F	cbioportal	benign
ALDH1L1	P	67	H	P67H	cosmics/cbioportal	cancer-risk
ALDH1L1	P	67	L	P67L	cosmics	cancer-risk
ALDH1L1	D	68	H	D68H	cbioportal	benign
ALDH1L1	A	71	T	A71T	tcga	benign
ALDH1L1	Y	73	F	Y73F	cbioportal	benign
ALDH1L1	Q	74	H	Q74H	cbioportal	benign
ALDH1L1	L	76	F	L76F	cosmics/tcga/cbioportal	cancer-risk
ALDH1L1	L	76	W	L76W	cosmics	cancer-risk
ALDH1L1	G	77	W	G77W	cbioportal	cancer-risk
ALDH1L1	V	82	F	V82F	cosmics/cbioportal	benign
ALDH1L1	V	82	I	V82I	cosmics	benign
ALDH1L1	C	86	F	C86F	cbioportal	benign
ALDH1L1	P	91	S	P91S	cbioportal	cancer-risk
ALDH1L1	M	92	I	M92I	cosmics	benign
ALDH1L1	P	98	L	P98L	cbioportal	benign
ALDH1L1	P	98	S	P98S	cosmics	cancer-risk
ALDH1L1	R	99	W	R99W	cbioportal	benign
ALDH1L1	H	100	R	H100R	cbioportal	benign
ALDH1L1	S	102	Y	S102Y	cbioportal	cancer-risk
ALDH1L1	I	104	R	I104R	cbioportal	cancer-risk
ALDH1L1	P	107	L	P107L	cosmics	benign
ALDH1L1	P	107	R	P107R	cbioportal	benign
ALDH1L1	P	107	T	P107T	cosmics/cbioportal	benign
ALDH1L1	R	114	L	R114L	cbioportal	benign
ALDH1L1	R	114	Q	R114Q	cbioportal	cancer-risk
ALDH1L1	S	117	L	S117L	cbioportal	cancer-risk
ALDH1L1	A	118	T	A118T	cosmics	benign
ALDH1L1	I	119	M	I119M	cosmics	benign
ALDH1L1	L	123	V	L123V	cbioportal	cancer-risk
ALDH1L1	G	126	E	G126E	cosmics/cbioportal	cancer-risk
ALDH1L1	G	126	R	G126R	cbioportal	benign
ALDH1L1	G	130	R	G130R	cbioportal	benign
ALDH1L1	G	130	V	G130V	cosmics/cbioportal	cancer-risk
ALDH1L1	F	132	V	F132V	cosmics	benign
ALDH1L1	S	133	F	S133F	cbioportal	cancer-risk
ALDH1L1	I	134	M	I134M	cosmics	benign
ALDH1L1	A	137	V	A137V	cbioportal	cancer-risk
ALDH1L1	D	138	N	D138N	cosmics/cbioportal	cancer-risk
ALDH1L1	G	140	V	G140V	tcga	cancer-risk
ALDH1L1	G	144	R	G144R	cbioportal	cancer-risk
ALDH1L1	E	151	D	E151D	cosmics	cancer-risk
ALDH1L1	C	152	S	C152S	cbioportal	cancer-risk
ALDH1L1	E	153	K	E153K	cbioportal	cancer-risk
ALDH1L1	D	157	G	D157G	cbioportal	benign
ALDH1L1	T	159	I	T159I	cbioportal	benign
ALDH1L1	R	166	H	R166H	cosmics	benign
ALDH1L1	P	170	S	P170S	cbioportal	cancer-risk
ALDH1L1	E	171	Q	E171Q	cbioportal	benign
ALDH1L1	G	175	E	G175E	cbioportal	cancer-risk
ALDH1L1	Q	178	K	Q178K	cbioportal	benign
ALDH1L1	A	179	V	A179V	cbioportal	benign
ALDH1L1	V	180	L	V180L	cosmics/cbioportal	benign
ALDH1L1	V	180	M	V180M	cbioportal	benign
ALDH1L1	R	181	M	R181M	cbioportal	benign
ALDH1L1	A	184	T	A184T	cosmics	benign
ALDH1L1	E	185	D	E185D	cbioportal	benign
ALDH1L1	G	186	A	G186A	cbioportal	benign
ALDH1L1	G	186	D	G186D	cbioportal	cancer-risk
ALDH1L1	P	192	S	P192S	cosmics	cancer-risk
ALDH1L1	P	194	H	P194H	cbioportal	benign
ALDH1L1	E	195	D	E195D	tcga	benign
ALDH1L1	E	196	K	E196K	cbioportal	cancer-risk
ALDH1L1	K	205	N	K205N	cbioportal	cancer-risk
ALDH1L1	Q	215	K	Q215K	cosmics	benign
ALDH1L1	A	217	T	A217T	cbioportal	benign
ALDH1L1	E	218	V	E218V	cosmics	cancer-risk
ALDH1L1	A	219	T	A219T	cbioportal	benign
ALDH1L1	H	221	D	H221D	cosmics	cancer-risk
ALDH1L1	N	222	K	N222K	cbioportal	cancer-risk
ALDH1L1	W	223	C	W223C	cbioportal	benign
ALDH1L1	W	223	L	W223L	cbioportal	cancer-risk
ALDH1L1	G	226	E	G226E	cbioportal	cancer-risk
ALDH1L1	G	226	K	G226K	cbioportal	benign
ALDH1L1	G	226	R	G226R	cbioportal	benign
ALDH1L1	N	227	K	N227K	cbioportal	cancer-risk
ALDH1L1	D	228	N	D228N	cbioportal	benign
ALDH1L1	A	237	T	A237T	cbioportal	benign
ALDH1L1	L	249	P	L249P	cosmics	benign
ALDH1L1	N	250	S	N250S	cbioportal	benign
ALDH1L1	L	254	V	L254V	cosmics	benign
ALDH1L1	P	256	A	P256A	cbioportal	cancer-risk
ALDH1L1	E	257	K	E257K	cosmics/cbioportal	cancer-risk
ALDH1L1	G	258	E	G258E	cosmics	cancer-risk
ALDH1L1	D	259	H	D259H	cosmics/cbioportal	benign
ALDH1L1	P	262	S	P262S	cosmics	cancer-risk
ALDH1L1	I	263	F	I263F	cosmics	benign
ALDH1L1	G	265	A	G265A	cbioportal	benign
ALDH1L1	A	266	V	A266V	cosmics	benign
ALDH1L1	H	267	N	H267N	cbioportal	benign
ALDH1L1	H	267	Q	H267Q	cbioportal	benign
ALDH1L1	R	268	W	R268W	cbioportal	cancer-risk
ALDH1L1	L	279	F	L279F	cosmics	benign
ALDH1L1	L	279	I	L279I	cbioportal	benign
ALDH1L1	G	281	W	G281W	cosmics	cancer-risk
ALDH1L1	D	283	N	D283N	cbioportal	cancer-risk
ALDH1L1	D	283	Y	D283Y	cbioportal	benign
ALDH1L1	M	286	I	M286I	cosmics	cancer-risk
ALDH1L1	D	296	N	D296N	cosmics	cancer-risk
ALDH1L1	M	299	I	M299I	cosmics	cancer-risk
ALDH1L1	F	305	L	F305L	cosmics/cbioportal	cancer-risk
ALDH1L1	G	308	R	G308R	cosmics	cancer-risk
ALDH1L1	E	318	Q	E318Q	cbioportal	cancer-risk
ALDH1L1	A	324	S	A324S	cbioportal	cancer-risk
ALDH1L1	A	326	T	A326T	cbioportal	benign
ALDH1L1	V	330	F	V330F	cosmics	benign
ALDH1L1	E	340	D	E340D	cosmics	cancer-risk
ALDH1L1	F	347	L	F347L	cbioportal	cancer-risk
ALDH1L1	A	353	T	A353T	cosmics	benign
ALDH1L1	A	353	V	A353V	cbioportal	cancer-risk
ALDH1L1	D	356	N	D356N	cbioportal	cancer-risk
ALDH1L1	V	357	I	V357I	cbioportal	cancer-risk
ALDH1L1	L	360	Q	L360Q	cbioportal	cancer-risk
ALDH1L1	E	363	K	E363K	cosmics	cancer-risk
ALDH1L1	G	370	A	G370A	cbioportal	cancer-risk
ALDH1L1	G	385	E	G385E	cbioportal	cancer-risk
ALDH1L1	G	385	R	G385R	cosmics	cancer-risk
ALDH1L1	D	386	G	D386G	cbioportal	benign
ALDH1L1	D	399	N	D399N	cosmics/cbioportal	cancer-risk
ALDH1L1	E	401	K	E401K	cbioportal	benign
ALDH1L1	S	405	I	S405I	cosmics	benign
ALDH1L1	D	407	N	D407N	cosmics	cancer-risk
ALDH1L1	R	416	C	R416C	cosmics	cancer-risk
ALDH1L1	R	416	S	R416S	cosmics/cbioportal	cancer-risk
ALDH1L1	R	419	C	R419C	cbioportal	cancer-risk
ALDH1L1	R	419	H	R419H	cosmics/cbioportal	cancer-risk
ALDH1L1	G	427	E	G427E	cosmics	cancer-risk
ALDH1L1	G	428	R	G428R	cosmics	benign
ALDH1L1	F	430	L	F430L	cbioportal	cancer-risk
ALDH1L1	V	431	M	V431M	cosmics	cancer-risk
ALDH1L1	A	433	V	A433V	cosmics	benign
ALDH1L1	E	434	Q	E434Q	cbioportal	cancer-risk
ALDH1L1	A	436	S	A436S	cosmics	cancer-risk
ALDH1L1	A	436	T	A436T	cosmics/cbioportal	benign
ALDH1L1	K	437	N	K437N	cbioportal	cancer-risk
ALDH1L1	T	441	I	T441I	cbioportal	benign
ALDH1L1	P	444	T	P444T	cbioportal	cancer-risk
ALDH1L1	D	446	N	D446N	cosmics/cbioportal	benign
ALDH1L1	Q	452	R	Q452R	cbioportal	benign
ALDH1L1	S	454	F	S454F	cosmics/cbioportal	cancer-risk
ALDH1L1	D	460	N	D460N	cbioportal	cancer-risk
ALDH1L1	D	460	Y	D460Y	cbioportal	cancer-risk
ALDH1L1	D	462	N	D462N	cbioportal	cancer-risk
ALDH1L1	V	465	L	V465L	cbioportal	cancer-risk
ALDH1L1	A	467	T	A467T	cbioportal	benign
ALDH1L1	A	468	T	A468T	cbioportal	benign
ALDH1L1	K	469	N	K469N	cosmics	cancer-risk
ALDH1L1	K	469	T	K469T	cbioportal	cancer-risk
ALDH1L1	D	470	Y	D470Y	tcga	cancer-risk
ALDH1L1	E	473	D	E473D	cbioportal	benign
ALDH1L1	R	476	Q	R476Q	cosmics	cancer-risk
ALDH1L1	R	476	W	R476W	cosmics	benign
ALDH1L1	G	478	E	G478E	cosmics	cancer-risk
ALDH1L1	G	478	R	G478R	cosmics/cbioportal	cancer-risk
ALDH1L1	K	479	T	K479T	tcga	benign
ALDH1L1	S	481	G	S481G	cosmics/cbioportal	cancer-risk
ALDH1L1	R	483	L	R483L	cosmics	benign
ALDH1L1	R	483	Q	R483Q	cbioportal	cancer-risk
ALDH1L1	R	483	W	R483W	cbioportal	benign
ALDH1L1	R	485	Q	R485Q	cosmics	cancer-risk
ALDH1L1	R	485	W	R485W	cbioportal	benign
ALDH1L1	R	487	W	R487W	cbioportal	cancer-risk
ALDH1L1	L	488	V	L488V	cbioportal	cancer-risk
ALDH1L1	D	494	Y	D494Y	cbioportal	cancer-risk
ALDH1L1	Q	498	K	Q498K	cbioportal	benign
ALDH1L1	A	504	S	A504S	cosmics	cancer-risk
ALDH1L1	A	511	V	A511V	cbioportal	cancer-risk
ALDH1L1	G	512	D	G512D	cbioportal	benign
ALDH1L1	G	512	S	G512S	cosmics	cancer-risk
ALDH1L1	V	514	A	V514A	cbioportal	cancer-risk
ALDH1L1	V	514	F	V514F	cosmics	benign
ALDH1L1	V	514	I	V514I	cosmics/cbioportal	cancer-risk
ALDH1L1	T	516	M	T516M	cosmics/cbioportal	benign
ALDH1L1	T	521	I	T521I	cosmics	cancer-risk
ALDH1L1	S	526	P	S526P	cbioportal	cancer-risk
ALDH1L1	R	531	C	R531C	cosmics/cbioportal	benign
ALDH1L1	R	531	H	R531H	cosmics/cbioportal	benign
ALDH1L1	R	531	S	R531S	cbioportal	benign
ALDH1L1	Y	532	H	Y532H	cbioportal	cancer-risk
ALDH1L1	F	533	S	F533S	cbioportal	benign
ALDH1L1	W	536	G	W536G	cosmics	benign
ALDH1L1	K	539	E	K539E	cbioportal	cancer-risk
ALDH1L1	G	542	D	G542D	cosmics/cbioportal	cancer-risk
ALDH1L1	N	548	D	N548D	cosmics	benign
ALDH1L1	R	554	H	R554H	cbioportal	cancer-risk
ALDH1L1	R	560	K	R560K	cosmics	benign
ALDH1L1	R	560	M	R560M	cbioportal	benign
ALDH1L1	P	563	H	P563H	cbioportal	benign
ALDH1L1	V	564	D	V564D	cbioportal	cancer-risk
ALDH1L1	G	565	W	G565W	cbioportal	benign
ALDH1L1	I	570	T	I570T	cbioportal	benign
ALDH1L1	P	572	S	P572S	cbioportal	benign
ALDH1L1	W	573	L	W573L	cbioportal	benign
ALDH1L1	P	576	L	P576L	cosmics	cancer-risk
ALDH1L1	P	576	S	P576S	cbioportal	cancer-risk
ALDH1L1	A	585	S	A585S	cbioportal	cancer-risk
ALDH1L1	C	587	R	C587R	cbioportal	cancer-risk
ALDH1L1	G	591	W	G591W	cosmics	cancer-risk
ALDH1L1	T	593	I	T593I	cbioportal	benign
ALDH1L1	A	599	P	A599P	tcga	cancer-risk
ALDH1L1	P	603	S	P603S	cbioportal	cancer-risk
ALDH1L1	L	607	F	L607F	cbioportal	cancer-risk
ALDH1L1	G	617	N	G617N	cosmics	benign
ALDH1L1	G	617	S	G617S	cbioportal	benign
ALDH1L1	P	619	L	P619L	cosmics	benign
ALDH1L1	G	621	D	G621D	cbioportal	cancer-risk
ALDH1L1	L	626	H	L626H	cbioportal	cancer-risk
ALDH1L1	G	628	E	G628E	cosmics/cbioportal	cancer-risk
ALDH1L1	S	629	F	S629F	cbioportal	cancer-risk
ALDH1L1	G	630	C	G630C	cbioportal	cancer-risk
ALDH1L1	S	631	C	S631C	cbioportal	benign
ALDH1L1	S	631	F	S631F	cosmics	cancer-risk
ALDH1L1	V	633	D	V633D	cbioportal	cancer-risk
ALDH1L1	G	634	S	G634S	cbioportal	benign
ALDH1L1	D	642	N	D642N	cosmics	benign
ALDH1L1	F	648	L	F648L	cosmics	benign
ALDH1L1	T	649	K	T649K	cbioportal	benign
ALDH1L1	G	650	S	G650S	cbioportal	cancer-risk
ALDH1L1	E	653	K	E653K	cosmics	cancer-risk
ALDH1L1	M	659	I	M659I	cosmics	cancer-risk
ALDH1L1	S	665	C	S665C	cbioportal	cancer-risk
ALDH1L1	S	665	N	S665N	cbioportal	cancer-risk
ALDH1L1	S	678	L	S678L	cbioportal	cancer-risk
ALDH1L1	L	680	I	L680I	cbioportal	benign
ALDH1L1	I	682	M	I682M	cbioportal	benign
ALDH1L1	L	688	F	L688F	cbioportal	cancer-risk
ALDH1L1	Q	693	H	Q693H	cbioportal	cancer-risk
ALDH1L1	G	695	E	G695E	cosmics	cancer-risk
ALDH1L1	S	698	Y	S698Y	cbioportal	cancer-risk
ALDH1L1	E	705	D	E705D	cbioportal	benign
ALDH1L1	A	710	V	A710V	cosmics	benign
ALDH1L1	V	715	L	V715L	cosmics	cancer-risk
ALDH1L1	H	720	Y	H720Y	cbioportal	cancer-risk
ALDH1L1	D	721	H	D721H	cbioportal	benign
ALDH1L1	E	722	K	E722K	cbioportal	cancer-risk
ALDH1L1	E	722	V	E722V	cbioportal	cancer-risk
ALDH1L1	V	724	M	V724M	cbioportal	cancer-risk
ALDH1L1	R	725	Q	R725Q	cosmics	benign
ALDH1L1	E	729	K	E729K	cbioportal	cancer-risk
ALDH1L1	E	730	D	E730D	cosmics/cbioportal	cancer-risk
ALDH1L1	E	730	K	E730K	cbioportal	cancer-risk
ALDH1L1	R	732	W	R732W	cbioportal	benign
ALDH1L1	G	737	D	G737D	cbioportal	cancer-risk
ALDH1L1	N	738	D	N738D	cbioportal	benign
ALDH1L1	P	739	L	P739L	cbioportal	cancer-risk
ALDH1L1	R	742	M	R742M	cosmics	cancer-risk
ALDH1L1	D	743	N	D743N	cbioportal	benign
ALDH1L1	D	745	N	D745N	cosmics/cbioportal	cancer-risk
ALDH1L1	G	747	D	G747D	cbioportal	cancer-risk
ALDH1L1	G	747	R	G747R	cbioportal	cancer-risk
ALDH1L1	H	754	N	H754N	cbioportal	benign
ALDH1L1	L	755	F	L755F	cosmics	cancer-risk
ALDH1L1	L	755	I	L755I	cosmics	cancer-risk
ALDH1L1	V	756	L	V756L	cbioportal	cancer-risk
ALDH1L1	K	757	E	K757E	cbioportal	cancer-risk
ALDH1L1	E	760	K	E760K	cbioportal	cancer-risk
ALDH1L1	Y	761	H	Y761H	cbioportal	cancer-risk
ALDH1L1	V	766	L	V766L	tcga	benign
ALDH1L1	K	767	E	K767E	tcga	benign
ALDH1L1	G	769	E	G769E	cbioportal	cancer-risk
ALDH1L1	A	770	V	A770V	cbioportal	benign
ALDH1L1	G	776	W	G776W	cbioportal	cancer-risk
ALDH1L1	V	779	F	V779F	cosmics/cbioportal	benign
ALDH1L1	R	781	Q	R781Q	cbioportal	cancer-risk
ALDH1L1	R	781	W	R781W	cbioportal	cancer-risk
ALDH1L1	F	785	L	F785L	cbioportal	benign
ALDH1L1	F	786	V	F786V	cbioportal	benign
ALDH1L1	D	793	Y	D793Y	cbioportal	cancer-risk
ALDH1L1	M	798	V	M798V	cbioportal	cancer-risk
ALDH1L1	E	803	G	E803G	cbioportal	cancer-risk
ALDH1L1	G	807	R	G807R	cbioportal	cancer-risk
ALDH1L1	M	810	I	M810I	cbioportal	cancer-risk
ALDH1L1	V	823	L	V823L	cbioportal	cancer-risk
ALDH1L1	R	826	P	R826P	cbioportal	cancer-risk
ALDH1L1	R	826	Q	R826Q	cosmics/cbioportal	cancer-risk
ALDH1L1	R	826	W	R826W	cbioportal	cancer-risk
ALDH1L1	E	831	K	E831K	cosmics	benign
ALDH1L1	S	836	F	S836F	cbioportal	cancer-risk
ALDH1L1	V	860	F	V860F	cbioportal	benign
ALDH1L1	T	866	I	T866I	cosmics	cancer-risk
ALDH1L1	A	869	P	A869P	cbioportal	cancer-risk
ALDH1L1	A	870	T	A870T	cosmics/cbioportal	cancer-risk
ALDH1L1	P	871	S	P871S	cbioportal	benign
ALDH1L1	G	873	R	G873R	cosmics	benign
ALDH1L1	S	878	Y	S878Y	cbioportal	cancer-risk
ALDH1L1	G	879	R	G879R	cosmics	cancer-risk
ALDH1L1	G	885	V	G885V	cosmics	cancer-risk
ALDH1L1	E	886	D	E886D	cosmics	benign
ALDH1L1	E	891	K	E891K	cbioportal	cancer-risk
ALDH1L1	R	894	L	R894L	cbioportal	cancer-risk
ALDH1L1	R	894	W	R894W	cosmics	cancer-risk
ALDH1L1	F	900	L	F900L	cbioportal	cancer-risk
ALDH1L1	E	901	Q	E901Q	cosmics	cancer-risk
ALDH1L2	R	16	G	R16G	cosmics	cancer-risk
ALDH1L2	S	31	N	S31N	cbioportal	benign
ALDH1L2	V	37	L	V37L	cbioportal	cancer-risk
ALDH1L2	H	40	N	H40N	cbioportal	benign
ALDH1L2	R	42	H	R42H	cbioportal	cancer-risk
ALDH1L2	R	42	S	R42S	cbioportal	cancer-risk
ALDH1L2	E	44	K	E44K	cosmics/cbioportal	benign
ALDH1L2	H	46	N	H46N	cbioportal	benign
ALDH1L2	R	47	Q	R47Q	cbioportal	cancer-risk
ALDH1L2	V	48	A	V48A	cosmics	benign
ALDH1L2	D	56	Y	D56Y	cosmics	benign
ALDH1L2	L	64	V	L64V	cbioportal	cancer-risk
ALDH1L2	A	65	T	A65T	cosmics/cbioportal	cancer-risk
ALDH1L2	L	66	F	L66F	cbioportal	cancer-risk
ALDH1L2	P	74	S	P74S	cbioportal	cancer-risk
ALDH1L2	G	85	C	G85C	cosmics	cancer-risk
ALDH1L2	G	85	S	G85S	cbioportal	cancer-risk
ALDH1L2	K	86	N	K86N	cosmics	cancer-risk
ALDH1L2	T	87	I	T87I	cbioportal	benign
ALDH1L2	I	88	M	I88M	cbioportal	cancer-risk
ALDH1L2	Y	95	C	Y95C	cbioportal	benign
ALDH1L2	R	96	I	R96I	cbioportal	cancer-risk
ALDH1L2	S	97	F	S97F	cosmics/cbioportal	cancer-risk
ALDH1L2	V	98	A	V98A	cbioportal	cancer-risk
ALDH1L2	V	98	L	V98L	cosmics/cbioportal	cancer-risk
ALDH1L2	E	101	K	E101K	cbioportal	benign
ALDH1L2	V	104	M	V104M	cbioportal	benign
ALDH1L2	F	107	L	F107L	cosmics	benign
ALDH1L2	F	107	S	F107S	cbioportal	cancer-risk
ALDH1L2	P	113	L	P113L	cbioportal	benign
ALDH1L2	P	113	S	P113S	cbioportal	cancer-risk
ALDH1L2	I	116	T	I116T	cosmics/cbioportal	benign
ALDH1L2	G	123	S	G123S	cbioportal	benign
ALDH1L2	G	123	V	G123V	cbioportal	cancer-risk
ALDH1L2	S	124	C	S124C	cbioportal	benign
ALDH1L2	A	138	T	A138T	cbioportal	benign
ALDH1L2	L	145	V	L145V	cosmics/cbioportal	cancer-risk
ALDH1L2	M	147	I	M147I	cbioportal	benign
ALDH1L2	G	148	R	G148R	cbioportal	cancer-risk
ALDH1L2	F	154	L	F154L	cbioportal	benign
ALDH1L2	P	167	S	P167S	cbioportal	cancer-risk
ALDH1L2	P	192	L	P192L	cbioportal	cancer-risk
ALDH1L2	P	192	S	P192S	cbioportal	cancer-risk
ALDH1L2	G	194	R	G194R	cosmics/cbioportal	cancer-risk
ALDH1L2	A	197	D	A197D	cbioportal	benign
ALDH1L2	A	197	T	A197T	cbioportal	benign
ALDH1L2	V	202	A	V202A	cbioportal	cancer-risk
ALDH1L2	I	205	T	I205T	cosmics	benign
ALDH1L2	A	206	T	A206T	tcga	benign
ALDH1L2	P	211	S	P211S	cosmics/cbioportal	cancer-risk
ALDH1L2	T	221	A	T221A	cbioportal	benign
ALDH1L2	E	223	G	E223G	cosmics	cancer-risk
ALDH1L2	Q	226	H	Q226H	cbioportal	benign
ALDH1L2	K	228	N	K228N	cbioportal	cancer-risk
ALDH1L2	A	231	D	A231D	cbioportal	cancer-risk
ALDH1L2	E	232	K	E232K	tcga	cancer-risk
ALDH1L2	A	239	D	A239D	cosmics	cancer-risk
ALDH1L2	E	240	K	E240K	cbioportal	cancer-risk
ALDH1L2	D	250	H	D250H	cbioportal	benign
ALDH1L2	P	253	T	P253T	cbioportal	benign
ALDH1L2	A	255	S	A255S	cbioportal	benign
ALDH1L2	I	259	K	I259K	cbioportal	benign
ALDH1L2	T	265	A	T265A	cbioportal	cancer-risk
ALDH1L2	Y	267	C	Y267C	cbioportal	benign
ALDH1L2	E	280	K	E280K	cbioportal	cancer-risk
ALDH1L2	E	283	K	E283K	cbioportal	cancer-risk
ALDH1L2	G	286	C	G286C	cbioportal	cancer-risk
ALDH1L2	G	286	R	G286R	cbioportal	cancer-risk
ALDH1L2	L	292	F	L292F	cbioportal	benign
ALDH1L2	V	293	F	V293F	cbioportal	benign
ALDH1L2	N	303	K	N303K	cosmics	cancer-risk
ALDH1L2	V	310	M	V310M	cosmics/cbioportal	cancer-risk
ALDH1L2	N	312	H	N312H	cbioportal	benign
ALDH1L2	Q	314	H	Q314H	cosmics	cancer-risk
ALDH1L2	G	318	E	G318E	cosmics	cancer-risk
ALDH1L2	G	318	R	G318R	cbioportal	cancer-risk
ALDH1L2	Q	325	K	Q325K	cbioportal	cancer-risk
ALDH1L2	S	328	L	S328L	cbioportal	cancer-risk
ALDH1L2	G	330	D	G330D	cbioportal	cancer-risk
ALDH1L2	E	331	V	E331V	cbioportal	cancer-risk
ALDH1L2	T	332	K	T332K	cbioportal	cancer-risk
ALDH1L2	S	333	Y	S333Y	tcga	benign
ALDH1L2	E	346	K	E346K	cbioportal	cancer-risk
ALDH1L2	G	354	V	G354V	cbioportal	cancer-risk
ALDH1L2	P	360	S	P360S	cosmics/cbioportal	cancer-risk
ALDH1L2	S	365	A	S365A	cbioportal	cancer-risk
ALDH1L2	V	382	F	V382F	cbioportal	benign
ALDH1L2	R	386	S	R386S	cbioportal	benign
ALDH1L2	T	403	A	T403A	cosmics	benign
ALDH1L2	T	403	N	T403N	cbioportal	benign
ALDH1L2	V	413	A	V413A	cbioportal	cancer-risk
ALDH1L2	D	420	H	D420H	cbioportal	benign
ALDH1L2	E	424	D	E424D	cbioportal	cancer-risk
ALDH1L2	N	435	D	N435D	cbioportal	cancer-risk
ALDH1L2	N	435	I	N435I	cbioportal	cancer-risk
ALDH1L2	E	436	K	E436K	cbioportal	cancer-risk
ALDH1L2	M	438	I	M438I	cbioportal	cancer-risk
ALDH1L2	P	442	L	P442L	cosmics/cbioportal	cancer-risk
ALDH1L2	F	451	L	F451L	cbioportal	benign
ALDH1L2	D	456	V	D456V	cosmics/cbioportal	benign
ALDH1L2	D	461	N	D461N	cbioportal	benign
ALDH1L2	N	464	K	N464K	cosmics/cbioportal	cancer-risk
ALDH1L2	N	464	Y	N464Y	cbioportal	cancer-risk
ALDH1L2	P	465	T	P465T	cbioportal	cancer-risk
ALDH1L2	T	466	P	T466P	cbioportal	benign
ALDH1L2	T	470	S	T470S	cbioportal	benign
ALDH1L2	K	473	N	K473N	cbioportal	cancer-risk
ALDH1L2	A	477	V	A477V	cbioportal	cancer-risk
ALDH1L2	S	478	Y	S478Y	cbioportal	benign
ALDH1L2	D	481	Y	D481Y	cbioportal	cancer-risk
ALDH1L2	A	492	V	A492V	cbioportal	cancer-risk
ALDH1L2	R	500	G	R500G	cosmics	benign
ALDH1L2	M	501	I	M501I	cbioportal	benign
ALDH1L2	R	504	I	R504I	cbioportal	benign
ALDH1L2	E	518	K	E518K	cbioportal	cancer-risk
ALDH1L2	E	519	D	E519D	cbioportal	cancer-risk
ALDH1L2	E	522	K	E522K	cbioportal	cancer-risk
ALDH1L2	A	525	E	A525E	cbioportal	cancer-risk
ALDH1L2	E	528	D	E528D	tcga	cancer-risk
ALDH1L2	D	531	H	D531H	cbioportal	benign
ALDH1L2	T	537	I	T537I	cosmics/cbioportal	benign
ALDH1L2	I	544	F	I544F	cbioportal	benign
ALDH1L2	V	548	A	V548A	cbioportal	cancer-risk
ALDH1L2	D	559	N	D559N	cbioportal	benign
ALDH1L2	D	559	Y	D559Y	cbioportal	benign
ALDH1L2	G	563	C	G563C	cbioportal	cancer-risk
ALDH1L2	P	567	Q	P567Q	cosmics	cancer-risk
ALDH1L2	P	567	T	P567T	cbioportal	benign
ALDH1L2	R	575	C	R575C	cbioportal	cancer-risk
ALDH1L2	R	575	H	R575H	cbioportal	cancer-risk
ALDH1L2	E	583	Q	E583Q	cbioportal	benign
ALDH1L2	G	586	C	G586C	cbioportal	cancer-risk
ALDH1L2	I	592	V	I592V	cosmics/cbioportal	benign
ALDH1L2	W	594	C	W594C	cbioportal	benign
ALDH1L2	M	600	I	M600I	cosmics/cbioportal	cancer-risk
ALDH1L2	A	602	T	A602T	cbioportal	benign
ALDH1L2	A	602	V	A602V	cbioportal	cancer-risk
ALDH1L2	P	619	Q	P619Q	cbioportal	cancer-risk
ALDH1L2	V	622	I	V622I	cbioportal	cancer-risk
ALDH1L2	P	624	L	P624L	cbioportal	cancer-risk
ALDH1L2	L	625	F	L625F	cbioportal	cancer-risk
ALDH1L2	A	631	S	A631S	cbioportal	benign
ALDH1L2	P	640	T	P640T	cosmics/cbioportal	benign
ALDH1L2	G	652	D	G652D	cbioportal	cancer-risk
ALDH1L2	G	652	S	G652S	cosmics	benign
ALDH1L2	I	653	T	I653T	cbioportal	cancer-risk
ALDH1L2	R	657	C	R657C	cbioportal	cancer-risk
ALDH1L2	R	657	H	R657H	cbioportal	cancer-risk
ALDH1L2	S	659	F	S659F	cosmics/cbioportal	cancer-risk
ALDH1L2	E	660	Q	E660Q	cbioportal	benign
ALDH1L2	P	662	S	P662S	cbioportal	benign
ALDH1L2	R	665	H	R665H	cbioportal	cancer-risk
ALDH1L2	K	666	T	K666T	cbioportal	cancer-risk
ALDH1L2	G	671	E	G671E	cbioportal	cancer-risk
ALDH1L2	I	675	T	I675T	cbioportal	benign
ALDH1L2	I	679	L	I679L	cbioportal	benign
ALDH1L2	M	680	I	M680I	cosmics/cbioportal	benign
ALDH1L2	S	699	F	S699F	cbioportal	cancer-risk
ALDH1L2	S	699	Y	S699Y	cbioportal	cancer-risk
ALDH1L2	A	712	D	A712D	cbioportal	benign
ALDH1L2	R	714	L	R714L	cbioportal	cancer-risk
ALDH1L2	R	714	Q	R714Q	cbioportal	cancer-risk
ALDH1L2	V	720	L	V720L	cbioportal	cancer-risk
ALDH1L2	F	722	L	F722L	cbioportal	cancer-risk
ALDH1L2	G	725	E	G725E	cosmics/cbioportal	benign
ALDH1L2	I	729	M	I729M	cbioportal	cancer-risk
ALDH1L2	G	732	A	G732A	cbioportal	cancer-risk
ALDH1L2	I	740	F	I740F	cbioportal	benign
ALDH1L2	I	740	M	I740M	cbioportal	cancer-risk
ALDH1L2	D	742	N	D742N	cbioportal	cancer-risk
ALDH1L2	E	743	K	E743K	cbioportal	cancer-risk
ALDH1L2	P	760	S	P760S	cbioportal	cancer-risk
ALDH1L2	L	761	I	L761I	cosmics/cbioportal	cancer-risk
ALDH1L2	S	764	T	S764T	cbioportal	benign
ALDH1L2	Q	770	K	Q770K	cbioportal	benign
ALDH1L2	Q	770	P	Q770P	cosmics/cbioportal	cancer-risk
ALDH1L2	H	772	Y	H772Y	cbioportal	benign
ALDH1L2	H	775	Y	H775Y	cosmics/cbioportal	benign
ALDH1L2	E	777	K	E777K	cbioportal	cancer-risk
ALDH1L2	E	784	K	E784K	cosmics/cbioportal	benign
ALDH1L2	V	787	M	V787M	cbioportal	benign
ALDH1L2	A	791	T	A791T	cbioportal	benign
ALDH1L2	G	796	V	G796V	cbioportal	cancer-risk
ALDH1L2	G	797	E	G797E	cosmics/cbioportal	cancer-risk
ALDH1L2	G	797	R	G797R	cbioportal	cancer-risk
ALDH1L2	R	798	K	R798K	cbioportal	benign
ALDH1L2	F	805	L	F805L	cosmics/cbioportal	benign
ALDH1L2	V	811	A	V811A	cosmics	cancer-risk
ALDH1L2	Y	820	H	Y820H	cbioportal	cancer-risk
ALDH1L2	A	822	V	A822V	cbioportal	cancer-risk
ALDH1L2	E	824	K	E824K	cosmics/cbioportal	benign
ALDH1L2	P	829	H	P829H	cosmics/cbioportal	cancer-risk
ALDH1L2	P	829	S	P829S	cbioportal	cancer-risk
ALDH1L2	G	839	R	G839R	cosmics/cbioportal	cancer-risk
ALDH1L2	D	842	N	D842N	cbioportal	benign
ALDH1L2	Q	846	E	Q846E	cbioportal	cancer-risk
ALDH1L2	R	847	G	R847G	cbioportal	cancer-risk
ALDH1L2	R	847	P	R847P	cbioportal	benign
ALDH1L2	E	852	K	E852K	cosmics/cbioportal	benign
ALDH1L2	A	856	V	A856V	cbioportal	benign
ALDH1L2	T	861	K	T861K	cbioportal	benign
ALDH1L2	R	862	T	R862T	cbioportal	cancer-risk
ALDH1L2	Y	869	C	Y869C	cbioportal	benign
ALDH1L2	E	872	V	E872V	cbioportal	cancer-risk
ALDH1L2	K	873	N	K873N	cbioportal	cancer-risk
ALDH1L2	K	873	Q	K873Q	cbioportal	benign
ALDH1L2	A	876	S	A876S	cbioportal	cancer-risk
ALDH1L2	A	876	V	A876V	tcga/cbioportal	cancer-risk
ALDH1L2	V	879	G	V879G	cbioportal	cancer-risk
ALDH1L2	T	883	K	T883K	cosmics/cbioportal	cancer-risk
ALDH1L2	D	888	G	D888G	cbioportal	cancer-risk
ALDH1L2	G	895	V	G895V	cbioportal	cancer-risk
ALDH1L2	F	901	I	F901I	cbioportal	benign
ALDH1L2	G	902	K	G902K	cbioportal	benign
ALDH1L2	E	912	D	E912D	cbioportal	cancer-risk
ALDH1L2	K	917	M	K917M	cbioportal	cancer-risk
ALDH1L2	V	919	A	V919A	cbioportal	cancer-risk
ALDH2	A	4	S	A4S	cbioportal	benign
ALDH2	G	13	D	G13D	tcga	cancer-risk
ALDH2	Q	30	E	Q30E	cbioportal	benign
ALDH2	Q	38	R	Q38R	cbioportal	cancer-risk
ALDH2	N	42	D	N42D	tcga	cancer-risk
ALDH2	N	42	S	N42S	cbioportal	cancer-risk
ALDH2	N	43	D	N43D	tcga/cbioportal	cancer-risk
ALDH2	P	55	F	P55F	cbioportal	cancer-risk
ALDH2	P	55	S	P55S	cbioportal	cancer-risk
ALDH2	T	56	A	T56A	tcga/cbioportal	cancer-risk
ALDH2	V	57	I	V57I	cbioportal	cancer-risk
ALDH2	G	62	K	G62K	cosmics/cbioportal	cancer-risk
ALDH2	V	68	A	V68A	cbioportal	cancer-risk
ALDH2	V	68	L	V68L	cbioportal	cancer-risk
ALDH2	E	74	K	E74K	cosmics	benign
ALDH2	V	80	L	V80L	tcga/cbioportal	cancer-risk
ALDH2	A	83	D	A83D	tcga/cbioportal	benign
ALDH2	A	83	T	A83T	cbioportal	benign
ALDH2	R	84	P	R84P	tcga	benign
ALDH2	F	87	L	F87L	cbioportal	cancer-risk
ALDH2	S	91	L	S91L	cbioportal	cancer-risk
ALDH2	R	94	S	R94S	cosmics	cancer-risk
ALDH2	R	95	C	R95C	cbioportal	benign
ALDH2	R	95	H	R95H	cbioportal	benign
ALDH2	D	97	N	D97N	cosmics	benign
ALDH2	G	102	C	G102C	cosmics	benign
ALDH2	R	107	C	R107C	cbioportal	benign
ALDH2	A	109	T	A109T	cosmics	cancer-risk
ALDH2	A	109	V	A109V	cbioportal	cancer-risk
ALDH2	R	114	W	R114W	cbioportal	cancer-risk
ALDH2	T	117	A	T117A	cbioportal	benign
ALDH2	T	117	S	T117S	cosmics/cbioportal	cancer-risk
ALDH2	A	120	V	A120V	cbioportal	cancer-risk
ALDH2	A	121	T	A121T	tcga/cbioportal	benign
ALDH2	T	124	I	T124I	cbioportal	benign
ALDH2	V	132	A	V132A	cbioportal	benign
ALDH2	S	134	F	S134F	cosmics	cancer-risk
ALDH2	D	138	E	D138E	cbioportal	cancer-risk
ALDH2	D	140	V	D140V	cbioportal	cancer-risk
ALDH2	Y	149	C	Y149C	cosmics/cbioportal	benign
ALDH2	A	150	T	A150T	cosmics	benign
ALDH2	A	150	V	A150V	tcga/cbioportal	benign
ALDH2	W	152	L	W152L	cosmics/cbioportal	cancer-risk
ALDH2	W	152	R	W152R	cbioportal	cancer-risk
ALDH2	H	157	N	H157N	cosmics	benign
ALDH2	T	160	I	T160I	cosmics	benign
ALDH2	P	162	T	P162T	cbioportal	benign
ALDH2	D	164	A	D164A	tcga/cbioportal	cancer-risk
ALDH2	G	165	A	G165A	cosmics/cbioportal	benign
ALDH2	G	165	E	G165E	cbioportal	cancer-risk
ALDH2	Y	170	H	Y170H	tcga/cbioportal	benign
ALDH2	P	175	H	P175H	tcga/cbioportal	cancer-risk
ALDH2	I	183	M	I183M	cbioportal	benign
ALDH2	P	184	L	P184L	cbioportal	cancer-risk
ALDH2	N	186	S	N186S	cosmics	cancer-risk
ALDH2	F	187	I	F187I	cbioportal	benign
ALDH2	P	188	Q	P188Q	tcga/cbioportal	cancer-risk
ALDH2	P	188	S	P188S	cosmics/tcga/cbioportal	cancer-risk
ALDH2	L	189	F	L189F	cbioportal	cancer-risk
ALDH2	M	191	V	M191V	tcga/cbioportal	cancer-risk
ALDH2	G	203	E	G203E	cosmics	cancer-risk
ALDH2	N	204	D	N204D	cbioportal	benign
ALDH2	V	207	L	V207L	cbioportal	benign
ALDH2	K	209	E	K209E	tcga/cbioportal	cancer-risk
ALDH2	A	211	T	A211T	tcga/cbioportal	cancer-risk
ALDH2	E	212	K	E212K	cbioportal	benign
ALDH2	A	218	T	A218T	cbioportal	benign
ALDH2	V	221	L	V221L	tcga	benign
ALDH2	E	227	K	E227K	cosmics/cbioportal	cancer-risk
ALDH2	A	228	T	A228T	cbioportal	benign
ALDH2	G	229	D	G229D	cbioportal	cancer-risk
ALDH2	P	231	S	P231S	cbioportal	cancer-risk
ALDH2	P	232	S	P232S	cbioportal	cancer-risk
ALDH2	T	244	M	T244M	cbioportal	cancer-risk
ALDH2	A	245	S	A245S	tcga/cbioportal	cancer-risk
ALDH2	A	245	T	A245T	cbioportal	cancer-risk
ALDH2	A	247	V	A247V	cbioportal	benign
ALDH2	A	248	V	A248V	cosmics/cbioportal	cancer-risk
ALDH2	A	250	T	A250T	tcga/cbioportal	benign
ALDH2	S	251	F	S251F	cbioportal	cancer-risk
ALDH2	E	253	K	E253K	cbioportal	benign
ALDH2	E	253	Q	E253Q	cosmics	cancer-risk
ALDH2	E	265	D	E265D	cbioportal	benign
ALDH2	R	268	C	R268C	cbioportal	benign
ALDH2	V	269	I	V269I	cbioportal	benign
ALDH2	G	275	R	G275R	cbioportal	cancer-risk
ALDH2	N	278	S	N278S	cbioportal	benign
ALDH2	K	280	N	K280N	tcga	cancer-risk
ALDH2	R	281	I	R281I	tcga/cbioportal	cancer-risk
ALDH2	P	291	L	P291L	cosmics/cbioportal	cancer-risk
ALDH2	D	301	Y	D301Y	cosmics/tcga/cbioportal	cancer-risk
ALDH2	W	302	L	W302L	cbioportal	cancer-risk
ALDH2	A	310	T	A310T	cbioportal	benign
ALDH2	G	316	A	G316A	tcga/cbioportal	benign
ALDH2	C	318	Y	C318Y	cbioportal	benign
ALDH2	A	321	V	A321V	cbioportal	benign
ALDH2	G	322	V	G322V	cbioportal	cancer-risk
ALDH2	D	330	N	D330N	tcga/cbioportal	cancer-risk
ALDH2	D	333	N	D333N	cbioportal	cancer-risk
ALDH2	E	334	D	E334D	cosmics	cancer-risk
ALDH2	V	340	I	V340I	cbioportal	cancer-risk
ALDH2	R	342	G	R342G	cosmics/cbioportal	benign
ALDH2	T	356	N	T356N	cosmics	benign
ALDH2	G	359	V	G359V	tcga/cbioportal	cancer-risk
ALDH2	V	362	M	V362M	tcga	cancer-risk
ALDH2	G	372	S	G372S	cbioportal	benign
ALDH2	G	377	R	G377R	cosmics	cancer-risk
ALDH2	E	380	K	E380K	cosmics	cancer-risk
ALDH2	K	383	M	K383M	cosmics/cbioportal	cancer-risk
ALDH2	K	383	N	K383N	tcga/cbioportal	cancer-risk
ALDH2	A	392	V	A392V	tcga/cbioportal	benign
ALDH2	R	394	C	R394C	cbioportal	cancer-risk
ALDH2	T	401	I	T401I	cosmics/cbioportal	benign
ALDH2	D	408	N	D408N	cosmics	benign
ALDH2	M	410	I	M410I	cbioportal	benign
ALDH2	E	415	K	E415K	cosmics	cancer-risk
ALDH2	G	419	E	G419E	cbioportal	cancer-risk
ALDH2	F	427	L	F427L	tcga/cbioportal	cancer-risk
ALDH2	F	427	S	F427S	cosmics/cbioportal	cancer-risk
ALDH2	K	428	N	K428N	cosmics/cbioportal	cancer-risk
ALDH2	E	432	K	E432K	tcga/cbioportal	benign
ALDH2	G	443	R	G443R	tcga/cbioportal	cancer-risk
ALDH2	A	445	T	A445T	tcga	benign
ALDH2	A	446	G	A446G	cosmics	benign
ALDH2	A	446	S	A446S	cosmics	benign
ALDH2	D	452	A	D452A	cbioportal	cancer-risk
ALDH2	A	456	T	A456T	cbioportal	benign
ALDH2	A	465	S	A465S	tcga/cbioportal	benign
ALDH2	A	465	V	A465V	cbioportal	benign
ALDH2	Y	473	H	Y473H	cbioportal	benign
ALDH2	P	481	S	P481S	cbioportal	cancer-risk
ALDH2	F	482	I	F482I	cosmics/cbioportal	benign
ALDH2	G	484	A	G484A	tcga/cbioportal	benign
ALDH2	M	487	V	M487V	cbioportal	benign
ALDH2	G	495	D	G495D	cbioportal	cancer-risk
ALDH2	G	498	E	G498E	tcga/cbioportal	cancer-risk
ALDH2	G	498	R	G498R	cbioportal	cancer-risk
ALDH2	A	501	V	A501V	tcga/cbioportal	benign
ALDH2	T	503	S	T503S	cosmics/cbioportal	benign
ALDH2	V	505	M	V505M	cbioportal	benign
ALDH2	K	511	T	K511T	tcga/cbioportal	benign
ALDH2	Q	514	E	Q514E	tcga/cbioportal	benign
ALDH3A1	E	6	K	E6K	cosmics/tcga/cbioportal	cancer-risk
ALDH3A1	A	7	T	A7T	cbioportal	benign
ALDH3A1	K	9	R	K9R	cbioportal	benign
ALDH3A1	A	11	T	A11T	cbioportal	cancer-risk
ALDH3A1	S	17	L	S17L	tcga/cbioportal	cancer-risk
ALDH3A1	P	22	L	P22L	cbioportal	benign
ALDH3A1	Q	42	L	Q42L	cbioportal	cancer-risk
ALDH3A1	G	46	R	G46R	cbioportal	cancer-risk
ALDH3A1	A	47	G	A47G	cbioportal	cancer-risk
ALDH3A1	E	56	K	E56K	tcga/cbioportal	cancer-risk
ALDH3A1	W	57	R	W57R	cbioportal	cancer-risk
ALDH3A1	V	67	D	V67D	cbioportal	cancer-risk
ALDH3A1	E	70	K	E70K	tcga/cbioportal	cancer-risk
ALDH3A1	I	71	T	I71T	tcga/cbioportal	benign
ALDH3A1	E	72	K	E72K	cosmics	benign
ALDH3A1	M	74	I	M74I	tcga/cbioportal	cancer-risk
ALDH3A1	M	74	V	M74V	cosmics	cancer-risk
ALDH3A1	I	75	L	I75L	cosmics/cbioportal	benign
ALDH3A1	L	78	F	L78F	cbioportal	benign
ALDH3A1	P	79	S	P79S	cosmics/cbioportal	cancer-risk
ALDH3A1	W	81	C	W81C	tcga/cbioportal	benign
ALDH3A1	A	82	V	A82V	cosmics	cancer-risk
ALDH3A1	A	83	V	A83V	cbioportal	cancer-risk
ALDH3A1	E	88	D	E88D	tcga/cbioportal	benign
ALDH3A1	E	88	K	E88K	cosmics/cbioportal	cancer-risk
ALDH3A1	E	97	K	E97K	tcga/cbioportal	cancer-risk
ALDH3A1	L	98	F	L98F	tcga/cbioportal	cancer-risk
ALDH3A1	S	102	L	S102L	cbioportal	cancer-risk
ALDH3A1	L	105	R	L105R	tcga/cbioportal	cancer-risk
ALDH3A1	L	109	F	L109F	cbioportal	benign
ALDH3A1	V	110	I	V110I	cbioportal	benign
ALDH3A1	G	112	V	G112V	cbioportal	cancer-risk
ALDH3A1	T	113	P	T113P	cbioportal	cancer-risk
ALDH3A1	N	119	D	N119D	tcga/cbioportal	cancer-risk
ALDH3A1	N	119	S	N119S	tcga/cbioportal	cancer-risk
ALDH3A1	A	128	T	A128T	cbioportal	benign
ALDH3A1	A	130	V	A130V	tcga/cbioportal	benign
ALDH3A1	A	131	V	A131V	tcga/cbioportal	benign
ALDH3A1	P	139	A	P139A	cosmics	cancer-risk
ALDH3A1	S	140	L	S140L	cbioportal	cancer-risk
ALDH3A1	E	141	K	E141K	cbioportal	benign
ALDH3A1	L	142	V	L142V	cbioportal	benign
ALDH3A1	A	151	T	A151T	cbioportal	benign
ALDH3A1	L	158	M	L158M	cbioportal	benign
ALDH3A1	P	164	Q	P164Q	cbioportal	cancer-risk
ALDH3A1	P	164	S	P164S	cosmics/cbioportal	cancer-risk
ALDH3A1	P	164	T	P164T	cbioportal	cancer-risk
ALDH3A1	G	168	W	G168W	cbioportal	cancer-risk
ALDH3A1	G	169	C	G169C	tcga/cbioportal	cancer-risk
ALDH3A1	G	169	S	G169S	cbioportal	cancer-risk
ALDH3A1	I	184	V	I184V	cosmics/cbioportal	benign
ALDH3A1	T	187	S	T187S	tcga/cbioportal	benign
ALDH3A1	G	188	D	G188D	tcga/cbioportal	cancer-risk
ALDH3A1	T	190	M	T190M	cbioportal	benign
ALDH3A1	G	191	A	G191A	tcga/cbioportal	benign
ALDH3A1	G	191	E	G191E	tcga/cbioportal	cancer-risk
ALDH3A1	G	193	E	G193E	tcga/cbioportal	cancer-risk
ALDH3A1	G	193	K	G193K	cosmics	cancer-risk
ALDH3A1	G	193	R	G193R	tcga/cbioportal	cancer-risk
ALDH3A1	I	195	M	I195M	cosmics	benign
ALDH3A1	I	195	V	I195V	tcga/cbioportal	benign
ALDH3A1	M	197	L	M197L	cbioportal	cancer-risk
ALDH3A1	A	199	V	A199V	tcga/cbioportal	benign
ALDH3A1	A	200	V	A200V	tcga/cbioportal	cancer-risk
ALDH3A1	K	202	E	K202E	tcga/cbioportal	benign
ALDH3A1	K	202	N	K202N	cosmics	cancer-risk
ALDH3A1	T	205	S	T205S	tcga/cbioportal	cancer-risk
ALDH3A1	T	208	M	T208M	cbioportal	cancer-risk
ALDH3A1	P	216	L	P216L	cbioportal	cancer-risk
ALDH3A1	P	216	S	P216S	cbioportal	cancer-risk
ALDH3A1	V	219	M	V219M	cbioportal	benign
ALDH3A1	A	228	T	A228T	cbioportal	cancer-risk
ALDH3A1	R	230	L	R230L	cbioportal	benign
ALDH3A1	A	233	V	A233V	cbioportal	benign
ALDH3A1	F	237	L	F237L	cbioportal	benign
ALDH3A1	N	239	I	N239I	tcga/cbioportal	cancer-risk
ALDH3A1	N	239	S	N239S	cbioportal	benign
ALDH3A1	I	256	F	I256F	cbioportal	cancer-risk
ALDH3A1	I	256	T	I256T	tcga/cbioportal	cancer-risk
ALDH3A1	V	261	G	V261G	cosmics/tcga/cbioportal	cancer-risk
ALDH3A1	V	261	M	V261M	cbioportal	benign
ALDH3A1	K	265	N	K265N	tcga	benign
ALDH3A1	F	271	L	F271L	cosmics/tcga/cbioportal	cancer-risk
ALDH3A1	Y	272	C	Y272C	cbioportal	cancer-risk
ALDH3A1	G	273	E	G273E	tcga/cbioportal	cancer-risk
ALDH3A1	D	275	N	D275N	cbioportal	benign
ALDH3A1	A	276	D	A276D	cbioportal	cancer-risk
ALDH3A1	S	279	F	S279F	cbioportal	cancer-risk
ALDH3A1	R	284	T	R284T	tcga/cbioportal	benign
ALDH3A1	V	294	G	V294G	cosmics/cbioportal	cancer-risk
ALDH3A1	E	299	K	E299K	tcga/cbioportal	cancer-risk
ALDH3A1	E	299	Q	E299Q	cbioportal	benign
ALDH3A1	K	302	E	K302E	tcga/cbioportal	benign
ALDH3A1	K	302	N	K302N	tcga/cbioportal	cancer-risk
ALDH3A1	G	306	W	G306W	tcga	cancer-risk
ALDH3A1	T	308	A	T308A	cosmics/cbioportal	benign
ALDH3A1	A	312	V	A312V	cbioportal	benign
ALDH3A1	R	314	H	R314H	cosmics/tcga/cbioportal	cancer-risk
ALDH3A1	A	317	S	A317S	tcga/cbioportal	benign
ALDH3A1	A	317	V	A317V	cbioportal	benign
ALDH3A1	T	322	M	T322M	cbioportal	benign
ALDH3A1	V	324	M	V324M	cbioportal	benign
ALDH3A1	P	329	T	P329T	cosmics/cbioportal	benign
ALDH3A1	Q	332	K	Q332K	tcga	cancer-risk
ALDH3A1	E	333	Q	E333Q	tcga/cbioportal	benign
ALDH3A1	F	336	L	F336L	cbioportal	benign
ALDH3A1	V	345	M	V345M	cbioportal	cancer-risk
ALDH3A1	R	358	H	R358H	cbioportal	benign
ALDH3A1	K	376	N	K376N	cbioportal	benign
ALDH3A1	E	380	D	E380D	tcga/cbioportal	benign
ALDH3A1	G	385	V	G385V	cbioportal	cancer-risk
ALDH3A1	D	390	N	D390N	cbioportal	benign
ALDH3A1	I	395	F	I395F	cbioportal	cancer-risk
ALDH3A1	T	396	I	T396I	cosmics	benign
ALDH3A1	L	397	S	L397S	cosmics	cancer-risk
ALDH3A1	H	398	L	H398L	cosmics	cancer-risk
ALDH3A1	P	401	L	P401L	tcga/cbioportal	cancer-risk
ALDH3A1	G	403	K	G403K	cosmics/cbioportal	cancer-risk
ALDH3A1	G	403	V	G403V	cosmics/cbioportal	cancer-risk
ALDH3A1	Y	413	C	Y413C	cbioportal	benign
ALDH3A1	E	420	K	E420K	cbioportal	benign
ALDH3A1	F	422	L	F422L	tcga/cbioportal	cancer-risk
ALDH3A1	L	433	V	L433V	tcga/cbioportal	benign
ALDH3A1	N	435	D	N435D	cbioportal	benign
ALDH3A1	D	436	N	D436N	cosmics/cbioportal	benign
ALDH3A1	G	438	D	G438D	tcga/cbioportal	cancer-risk
ALDH3A1	K	440	T	K440T	cbioportal	cancer-risk
ALDH3A1	V	441	A	V441A	cbioportal	benign
ALDH3A1	R	442	I	R442I	tcga/cbioportal	cancer-risk
ALDH3A1	Y	443	C	Y443C	cbioportal	benign
ALDH3A1	P	444	S	P444S	cbioportal	cancer-risk
ALDH3A1	P	445	Q	P445Q	cbioportal	cancer-risk
ALDH3A1	P	445	S	P445S	cosmics/cbioportal	cancer-risk
ALDH3A1	S	446	I	S446I	cbioportal	cancer-risk
ALDH3A1	T	451	I	T451I	cosmics	benign
ALDH3A2	A	11	V	A11V	cbioportal	benign
ALDH3A2	R	16	L	R16L	cbioportal	cancer-risk
ALDH3A2	L	49	P	L49P	cbioportal	cancer-risk
ALDH3A2	N	55	S	N55S	cbioportal	cancer-risk
ALDH3A2	N	74	T	N74T	cbioportal	cancer-risk
ALDH3A2	V	104	L	V104L	cbioportal	benign
ALDH3A2	G	109	R	G109R	cbioportal	cancer-risk
ALDH3A2	W	111	R	W111R	cbioportal	benign
ALDH3A2	A	127	T	A127T	cbioportal	benign
ALDH3A2	G	129	E	G129E	cbioportal	cancer-risk
ALDH3A2	S	137	C	S137C	cbioportal	cancer-risk
ALDH3A2	S	140	C	S140C	cbioportal	cancer-risk
ALDH3A2	N	142	K	N142K	cbioportal	cancer-risk
ALDH3A2	K	145	N	K145N	cbioportal	cancer-risk
ALDH3A2	K	145	R	K145R	cbioportal	benign
ALDH3A2	L	159	I	L159I	cbioportal	benign
ALDH3A2	Q	176	R	Q176R	cbioportal	cancer-risk
ALDH3A2	R	177	L	R177L	cbioportal	cancer-risk
ALDH3A2	T	184	M	T184M	cbioportal	benign
ALDH3A2	G	185	V	G185V	cbioportal	cancer-risk
ALDH3A2	A	188	V	A188V	cbioportal	benign
ALDH3A2	V	189	F	V189F	cbioportal	benign
ALDH3A2	E	195	K	E195K	cbioportal	benign
ALDH3A2	A	196	V	A196V	cbioportal	benign
ALDH3A2	I	216	V	I216V	cbioportal	cancer-risk
ALDH3A2	D	217	N	D217N	cbioportal	cancer-risk
ALDH3A2	D	219	Y	D219Y	cbioportal	benign
ALDH3A2	R	227	K	R227K	cbioportal	cancer-risk
ALDH3A2	R	228	L	R228L	cbioportal	cancer-risk
ALDH3A2	A	251	T	A251T	cbioportal	benign
ALDH3A2	L	253	I	L253I	cbioportal	cancer-risk
ALDH3A2	V	265	M	V265M	cbioportal	cancer-risk
ALDH3A2	G	270	V	G270V	cbioportal	cancer-risk
ALDH3A2	S	276	T	S276T	cbioportal	benign
ALDH3A2	N	284	I	N284I	cbioportal	cancer-risk
ALDH3A2	R	286	P	R286P	cbioportal	cancer-risk
ALDH3A2	R	286	S	R286S	cbioportal	cancer-risk
ALDH3A2	L	295	I	L295I	cbioportal	benign
ALDH3A2	K	299	N	K299N	cbioportal	cancer-risk
ALDH3A2	R	311	H	R311H	cbioportal	cancer-risk
ALDH3A2	D	322	H	D322H	cbioportal	benign
ALDH3A2	P	338	S	P338S	cbioportal	cancer-risk
ALDH3A2	N	350	H	N350H	cbioportal	cancer-risk
ALDH3A2	F	351	V	F351V	cbioportal	benign
ALDH3A2	S	365	L	S365L	cbioportal	cancer-risk
ALDH3A2	H	368	R	H368R	cbioportal	cancer-risk
ALDH3A2	K	369	N	K369N	cbioportal	cancer-risk
ALDH3A2	I	371	V	I371V	cbioportal	cancer-risk
ALDH3A2	R	373	L	R373L	cbioportal	cancer-risk
ALDH3A2	R	373	Q	R373Q	cbioportal	benign
ALDH3A2	R	373	W	R373W	cbioportal	cancer-risk
ALDH3A2	V	388	I	V388I	cbioportal	cancer-risk
ALDH3A2	S	396	C	S396C	cbioportal	benign
ALDH3A2	S	396	Y	S396Y	cbioportal	cancer-risk
ALDH3A2	P	398	L	P398L	cbioportal	cancer-risk
ALDH3A2	F	399	Y	F399Y	cbioportal	benign
ALDH3A2	G	400	V	G400V	cbioportal	cancer-risk
ALDH3A2	S	404	F	S404F	cbioportal	benign
ALDH3A2	G	408	R	G408R	cbioportal	cancer-risk
ALDH3A2	G	412	R	G412R	cbioportal	cancer-risk
ALDH3A2	G	412	V	G412V	cbioportal	cancer-risk
ALDH3A2	T	418	I	T418I	cbioportal	benign
ALDH3A2	S	420	Y	S420Y	cbioportal	cancer-risk
ALDH3A2	P	424	L	P424L	cbioportal	cancer-risk
ALDH3A2	P	424	S	P424S	cbioportal	cancer-risk
ALDH3A2	L	426	V	L426V	cbioportal	benign
ALDH3A2	N	436	I	N436I	cbioportal	cancer-risk
ALDH3A2	R	439	K	R439K	cbioportal	benign
ALDH3A2	P	441	S	P441S	cbioportal	cancer-risk
ALDH3A2	K	447	E	K447E	cbioportal	benign
ALDH3A2	K	452	N	K452N	cbioportal	cancer-risk
ALDH3A2	F	453	I	F453I	cbioportal	benign
ALDH3A2	L	455	F	L455F	cbioportal	benign
ALDH3A2	R	458	Q	R458Q	cbioportal	cancer-risk
ALDH3A2	G	465	S	G465S	cbioportal	cancer-risk
ALDH3A2	A	477	S	A477S	cbioportal	benign
ALDH3B1	D	2	Y	D2Y	cbioportal	cancer-risk
ALDH3B1	P	3	L	P3L	cbioportal	benign
ALDH3B1	P	3	S	P3S	cosmics	cancer-risk
ALDH3B1	R	12	Q	R12Q	cbioportal	cancer-risk
ALDH3B1	R	12	W	R12W	cbioportal	cancer-risk
ALDH3B1	H	16	N	H16N	cbioportal	benign
ALDH3B1	A	17	V	A17V	cbioportal	benign
ALDH3B1	G	18	R	G18R	cbioportal	benign
ALDH3B1	R	21	W	R21W	cbioportal	cancer-risk
ALDH3B1	L	30	V	L30V	cbioportal	benign
ALDH3B1	G	34	D	G34D	tcga/cbioportal	cancer-risk
ALDH3B1	R	35	L	R35L	cbioportal	benign
ALDH3B1	D	46	N	D46N	tcga	cancer-risk
ALDH3B1	K	54	N	K54N	tcga	benign
ALDH3B1	S	67	I	S67I	cbioportal	cancer-risk
ALDH3B1	E	70	K	E70K	cbioportal	benign
ALDH3B1	L	75	F	L75F	tcga	benign
ALDH3B1	N	77	T	N77T	cosmics/cbioportal	benign
ALDH3B1	A	98	T	A98T	tcga	benign
ALDH3B1	R	101	W	R101W	cosmics	cancer-risk
ALDH3B1	P	117	L	P117L	cosmics	cancer-risk
ALDH3B1	G	132	R	G132R	cbioportal	cancer-risk
ALDH3B1	V	135	A	V135A	tcga/cbioportal	benign
ALDH3B1	E	141	Q	E141Q	cbioportal	cancer-risk
ALDH3B1	V	146	I	V146I	tcga	cancer-risk
ALDH3B1	E	147	K	E147K	cosmics	cancer-risk
ALDH3B1	D	159	N	D159N	cosmics	benign
ALDH3B1	G	169	R	G169R	tcga	cancer-risk
ALDH3B1	E	172	D	E172D	cosmics/tcga	cancer-risk
ALDH3B1	E	178	Q	E178Q	tcga	benign
ALDH3B1	G	193	S	G193S	cosmics	cancer-risk
ALDH3B1	V	207	F	V207F	tcga	cancer-risk
ALDH3B1	G	212	S	G212S	cbioportal	cancer-risk
ALDH3B1	G	213	S	G213S	cosmics	cancer-risk
ALDH3B1	K	214	N	K214N	tcga	cancer-risk
ALDH3B1	P	216	H	P216H	tcga	cancer-risk
ALDH3B1	D	220	Y	D220Y	cbioportal	cancer-risk
ALDH3B1	T	227	I	T227I	cosmics	benign
ALDH3B1	V	228	M	V228M	tcga	benign
ALDH3B1	R	231	C	R231C	cosmics	benign
ALDH3B1	R	231	H	R231H	cosmics	benign
ALDH3B1	V	232	A	V232A	cosmics	benign
ALDH3B1	G	241	D	G241D	tcga	cancer-risk
ALDH3B1	V	245	M	V245M	cosmics	benign
ALDH3B1	P	247	L	P247L	cosmics	cancer-risk
ALDH3B1	D	248	Y	D248Y	tcga	cancer-risk
ALDH3B1	R	270	C	R270C	tcga	benign
ALDH3B1	D	275	A	D275A	cbioportal	cancer-risk
ALDH3B1	D	275	N	D275N	cbioportal	cancer-risk
ALDH3B1	P	280	R	P280R	tcga	cancer-risk
ALDH3B1	P	280	S	P280S	cosmics	cancer-risk
ALDH3B1	R	284	G	R284G	cosmics	cancer-risk
ALDH3B1	R	284	H	R284H	tcga	cancer-risk
ALDH3B1	I	285	T	I285T	tcga	benign
ALDH3B1	R	293	Q	R293Q	cosmics	cancer-risk
ALDH3B1	R	293	W	R293W	tcga	benign
ALDH3B1	R	295	Q	R295Q	cosmics	cancer-risk
ALDH3B1	R	295	W	R295W	tcga	cancer-risk
ALDH3B1	G	299	R	G299R	cbioportal	cancer-risk
ALDH3B1	G	299	W	G299W	cbioportal	cancer-risk
ALDH3B1	G	301	A	G301A	cosmics	benign
[truncated: 823 more rows]
