# Supplementary material for: Identifying the Molecular Drivers of Pathogenic Aldehyde Dehydrogenase Missense Mutations in Cancer and Non-Cancer Diseases
Source: Int J Mol Sci. 2023 Jun 15;24(12):10157. doi: 10.3390/ijms241210157 (PMC10299257; doi:10.3390/ijms241210157)
Supplement: Supplementary file 1 [file ijms-24-10157-s001.zip › aldh_gnomad_prediction.csv]

Gene	wt	pos	mt	mutation	Allele_Frequency	source	cancer_predictions	noncancer_pathogenic_predictions
ALDH16A1	R	5	P	R5P	5.45E-06	gnomad	benign	benign
ALDH16A1	P	8	A	P8A	5.45E-06	gnomad	cancer-risk	benign
ALDH16A1	P	8	S	P8S	2.18E-05	gnomad	cancer-risk	benign
ALDH16A1	R	9	G	R9G	1.63E-05	gnomad	benign	non-cancer_pathogenic
ALDH16A1	R	9	S	R9S	0.000185	gnomad	benign	benign
ALDH16A1	A	10	P	A10P	1.63E-05	gnomad	cancer-risk	non-cancer_pathogenic
ALDH16A1	A	10	V	A10V	5.44E-06	gnomad	benign	benign
ALDH16A1	R	11	C	R11C	5.42E-06	gnomad	benign	benign
ALDH16A1	E	12	D	E12D	5.39E-06	gnomad	benign	benign
ALDH16A1	T	15	I	T15I	1.10E-05	gnomad	benign	benign
ALDH16A1	T	15	S	T15S	0.000173	gnomad	benign	benign
ALDH16A1	S	16	W	S16W	0.000167	gnomad	cancer-risk	non-cancer_pathogenic
ALDH16A1	Y	19	H	Y19H	5.78E-06	gnomad	benign	non-cancer_pathogenic
ALDH16A1	Y	19	S	Y19S	3.19E-05	gnomad	cancer-risk	non-cancer_pathogenic
ALDH16A1	P	21	R	P21R	1.19E-05	gnomad	benign	non-cancer_pathogenic
ALDH16A1	V	22	G	V22G	5.99E-06	gnomad	cancer-risk	non-cancer_pathogenic
ALDH16A1	V	22	L	V22L	6.00E-06	gnomad	cancer-risk	non-cancer_pathogenic
ALDH16A1	E	24	K	E24K	6.11E-06	gnomad	cancer-risk	benign
ALDH16A1	E	24	Q	E24Q	1.22E-05	gnomad	benign	non-cancer_pathogenic
ALDH16A1	H	26	N	H26N	2.54E-05	gnomad	cancer-risk	benign
ALDH16A1	D	37	N	D37N	5.66E-06	gnomad	cancer-risk	non-cancer_pathogenic
ALDH16A1	R	38	Q	R38Q	2.25E-05	gnomad	cancer-risk	benign
ALDH16A1	R	38	W	R38W	3.83E-05	gnomad	cancer-risk	benign
ALDH16A1	Y	43	C	Y43C	2.81E-05	gnomad	benign	non-cancer_pathogenic
ALDH16A1	H	53	P	H53P	5.64E-06	gnomad	cancer-risk	non-cancer_pathogenic
ALDH16A1	R	54	K	R54K	5.69E-06	gnomad	benign	benign
ALDH16A1	N	55	Y	N55Y	5.70E-06	gnomad	benign	benign
ALDH16A1	V	57	A	V57A	1.16E-05	gnomad	benign	benign
ALDH16A1	V	57	L	V57L	1.16E-05	gnomad	benign	non-cancer_pathogenic
ALDH16A1	P	58	L	P58L	5.85E-06	gnomad	benign	non-cancer_pathogenic
ALDH16A1	N	67	S	N67S	3.19E-05	gnomad	benign	non-cancer_pathogenic
ALDH16A1	L	68	V	L68V	1.20E-05	gnomad	benign	non-cancer_pathogenic
ALDH16A1	A	69	S	A69S	4.00E-06	gnomad	cancer-risk	benign
ALDH16A1	S	70	T	S70T	7.99E-06	gnomad	cancer-risk	benign
ALDH16A1	C	71	F	C71F	4.00E-06	gnomad	benign	non-cancer_pathogenic
ALDH16A1	L	72	Q	L72Q	4.26E-05	gnomad	cancer-risk	benign
ALDH16A1	A	76	V	A76V	0.000112	gnomad	cancer-risk	non-cancer_pathogenic
ALDH16A1	E	77	G	E77G	4.00E-06	gnomad	cancer-risk	non-cancer_pathogenic
ALDH16A1	E	77	K	E77K	2.40E-05	gnomad	cancer-risk	benign
ALDH16A1	V	83	L	V83L	3.99E-06	gnomad	cancer-risk	non-cancer_pathogenic
ALDH16A1	V	83	M	V83M	3.99E-05	gnomad	cancer-risk	non-cancer_pathogenic
ALDH16A1	A	85	V	A85V	3.99E-06	gnomad	cancer-risk	non-cancer_pathogenic
ALDH16A1	A	86	G	A86G	7.99E-06	gnomad	cancer-risk	non-cancer_pathogenic
ALDH16A1	A	86	P	A86P	3.99E-06	gnomad	cancer-risk	non-cancer_pathogenic
ALDH16A1	R	87	G	R87G	3.99E-06	gnomad	cancer-risk	non-cancer_pathogenic
ALDH16A1	F	90	C	F90C	3.99E-06	gnomad	benign	non-cancer_pathogenic
ALDH16A1	A	95	T	A95T	3.19E-05	gnomad	benign	benign
ALDH16A1	A	95	V	A95V	1.20E-05	gnomad	benign	non-cancer_pathogenic
ALDH16A1	P	97	S	P97S	4.01E-06	gnomad	cancer-risk	benign
ALDH16A1	G	98	S	G98S	8.05E-06	gnomad	benign	non-cancer_pathogenic
ALDH16A1	V	99	G	V99G	8.21E-05	gnomad	cancer-risk	non-cancer_pathogenic
ALDH16A1	V	99	I	V99I	2.01E-05	gnomad	benign	non-cancer_pathogenic
ALDH16A1	V	100	I	V100I	1.79E-05	gnomad	benign	non-cancer_pathogenic
ALDH16A1	R	101	Q	R101Q	1.07E-05	gnomad	cancer-risk	non-cancer_pathogenic
ALDH16A1	A	102	S	A102S	8.07E-06	gnomad	benign	benign
ALDH16A1	Q	103	P	Q103P	4.04E-06	gnomad	cancer-risk	non-cancer_pathogenic
ALDH16A1	Q	103	R	Q103R	2.02E-05	gnomad	cancer-risk	benign
ALDH16A1	H	104	Y	H104Y	8.08E-06	gnomad	benign	benign
ALDH16A1	L	108	M	L108M	3.18E-05	gnomad	cancer-risk	benign
ALDH16A1	V	111	M	V111M	4.08E-06	gnomad	cancer-risk	benign
ALDH16A1	K	114	M	K114M	4.09E-06	gnomad	cancer-risk	benign
ALDH16A1	H	115	R	H115R	4.09E-06	gnomad	cancer-risk	non-cancer_pathogenic
ALDH16A1	T	121	I	T121I	9.56E-05	gnomad	benign	benign
ALDH16A1	E	123	A	E123A	4.01E-06	gnomad	cancer-risk	non-cancer_pathogenic
ALDH16A1	T	127	S	T127S	0.00941	gnomad	cancer-risk	benign
ALDH16A1	R	129	W	R129W	2.84E-05	gnomad	cancer-risk	non-cancer_pathogenic
ALDH16A1	R	132	Q	R132Q	0.000479	gnomad	cancer-risk	non-cancer_pathogenic
ALDH16A1	E	133	D	E133D	3.99E-06	gnomad	cancer-risk	non-cancer_pathogenic
ALDH16A1	E	133	K	E133K	7.10E-06	gnomad	benign	non-cancer_pathogenic
ALDH16A1	V	134	L	V134L	3.99E-06	gnomad	cancer-risk	non-cancer_pathogenic
ALDH16A1	R	135	G	R135G	3.99E-06	gnomad	benign	non-cancer_pathogenic
ALDH16A1	G	137	R	G137R	0.000252	gnomad	cancer-risk	benign
ALDH16A1	D	138	G	D138G	1.60E-05	gnomad	benign	non-cancer_pathogenic
ALDH16A1	V	139	I	V139I	0.000586	gnomad	cancer-risk	benign
ALDH16A1	Q	143	R	Q143R	7.99E-06	gnomad	cancer-risk	non-cancer_pathogenic
ALDH16A1	H	149	L	H149L	3.99E-06	gnomad	cancer-risk	non-cancer_pathogenic
ALDH16A1	H	149	R	H149R	0.000167	gnomad	cancer-risk	benign
ALDH16A1	H	149	Y	H149Y	7.99E-06	gnomad	cancer-risk	benign
ALDH16A1	Q	152	R	Q152R	0.000116	gnomad	cancer-risk	non-cancer_pathogenic
ALDH16A1	T	155	I	T155I	4.00E-06	gnomad	benign	benign
ALDH16A1	Q	156	H	Q156H	4.00E-06	gnomad	cancer-risk	non-cancer_pathogenic
ALDH16A1	L	160	V	L160V	3.18E-05	gnomad	benign	non-cancer_pathogenic
ALDH16A1	A	161	T	A161T	3.19E-05	gnomad	benign	benign
ALDH16A1	E	164	K	E164K	4.63E-05	gnomad	cancer-risk	benign
ALDH16A1	G	167	E	G167E	3.99E-06	gnomad	cancer-risk	non-cancer_pathogenic
ALDH16A1	V	168	L	V168L	1.20E-05	gnomad	benign	non-cancer_pathogenic
ALDH16A1	I	169	T	I169T	4.61E-05	gnomad	benign	non-cancer_pathogenic
ALDH16A1	L	171	F	L171F	3.99E-06	gnomad	cancer-risk	non-cancer_pathogenic
ALDH16A1	T	176	A	T176A	1.99E-05	gnomad	cancer-risk	benign
ALDH16A1	S	178	P	S178P	0.000404	gnomad	cancer-risk	benign
ALDH16A1	F	179	V	F179V	3.98E-06	gnomad	benign	non-cancer_pathogenic
ALDH16A1	M	183	R	M183R	3.19E-05	gnomad	cancer-risk	non-cancer_pathogenic
ALDH16A1	R	185	S	R185S	3.98E-06	gnomad	cancer-risk	non-cancer_pathogenic
ALDH16A1	P	188	L	P188L	3.98E-06	gnomad	cancer-risk	non-cancer_pathogenic
ALDH16A1	A	189	S	A189S	3.98E-06	gnomad	cancer-risk	non-cancer_pathogenic
ALDH16A1	L	190	M	L190M	3.98E-06	gnomad	cancer-risk	non-cancer_pathogenic
ALDH16A1	A	191	P	A191P	6.38E-05	gnomad	cancer-risk	benign
ALDH16A1	A	191	V	A191V	3.98E-06	gnomad	benign	non-cancer_pathogenic
ALDH16A1	V	192	M	V192M	7.97E-06	gnomad	benign	benign
ALDH16A1	G	193	S	G193S	3.98E-06	gnomad	cancer-risk	non-cancer_pathogenic
ALDH16A1	T	195	S	T195S	8.64E-06	gnomad	benign	benign
ALDH16A1	V	196	L	V196L	4.88E-06	gnomad	cancer-risk	non-cancer_pathogenic
ALDH16A1	V	196	M	V196M	3.42E-05	gnomad	cancer-risk	non-cancer_pathogenic
ALDH16A1	V	197	L	V197L	3.20E-05	gnomad	benign	non-cancer_pathogenic
ALDH16A1	A	198	P	A198P	4.81E-06	gnomad	cancer-risk	non-cancer_pathogenic
ALDH16A1	V	200	L	V200L	1.87E-05	gnomad	benign	benign
ALDH16A1	V	200	M	V200M	5.61E-05	gnomad	benign	non-cancer_pathogenic
ALDH16A1	P	202	A	P202A	4.59E-06	gnomad	cancer-risk	benign
ALDH16A1	P	202	L	P202L	1.83E-05	gnomad	benign	non-cancer_pathogenic
ALDH16A1	P	202	R	P202R	2.00E-05	gnomad	benign	non-cancer_pathogenic
ALDH16A1	P	202	S	P202S	1.83E-05	gnomad	cancer-risk	non-cancer_pathogenic
ALDH16A1	P	202	T	P202T	4.59E-06	gnomad	benign	non-cancer_pathogenic
ALDH16A1	A	206	E	A206E	4.43E-06	gnomad	cancer-risk	non-cancer_pathogenic
ALDH16A1	A	206	V	A206V	4.28E-05	gnomad	benign	non-cancer_pathogenic
ALDH16A1	L	208	V	L208V	4.35E-06	gnomad	benign	non-cancer_pathogenic
ALDH16A1	L	209	V	L209V	3.05E-05	gnomad	benign	non-cancer_pathogenic
ALDH16A1	A	211	D	A211D	1.30E-05	gnomad	cancer-risk	non-cancer_pathogenic
ALDH16A1	A	214	T	A214T	4.31E-06	gnomad	cancer-risk	non-cancer_pathogenic
ALDH16A1	A	214	V	A214V	5.19E-05	gnomad	cancer-risk	non-cancer_pathogenic
ALDH16A1	G	215	E	G215E	3.01E-05	gnomad	cancer-risk	non-cancer_pathogenic
ALDH16A1	E	216	Q	E216Q	4.29E-06	gnomad	benign	benign
ALDH16A1	G	218	A	G218A	4.27E-06	gnomad	benign	benign
ALDH16A1	G	218	D	G218D	6.83E-05	gnomad	cancer-risk	non-cancer_pathogenic
ALDH16A1	G	218	R	G218R	8.52E-06	gnomad	benign	non-cancer_pathogenic
ALDH16A1	G	218	S	G218S	8.52E-06	gnomad	benign	non-cancer_pathogenic
ALDH16A1	F	220	V	F220V	8.45E-06	gnomad	benign	non-cancer_pathogenic
ALDH16A1	P	221	R	P221R	8.42E-06	gnomad	benign	non-cancer_pathogenic
ALDH16A1	I	223	V	I223V	8.35E-06	gnomad	benign	benign
ALDH16A1	L	224	P	L224P	0.00223	gnomad	cancer-risk	non-cancer_pathogenic
ALDH16A1	N	225	K	N225K	2.20E-05	gnomad	cancer-risk	non-cancer_pathogenic
ALDH16A1	V	226	F	V226F	8.31E-06	gnomad	cancer-risk	non-cancer_pathogenic
ALDH16A1	L	227	I	L227I	1.85E-05	gnomad	benign	benign
ALDH16A1	L	227	P	L227P	4.15E-06	gnomad	benign	non-cancer_pathogenic
ALDH16A1	G	229	S	G229S	7.72E-05	gnomad	benign	benign
ALDH16A1	P	230	A	P230A	1.67E-05	gnomad	cancer-risk	non-cancer_pathogenic
ALDH16A1	P	230	L	P230L	8.33E-06	gnomad	benign	non-cancer_pathogenic
ALDH16A1	A	231	E	A231E	3.19E-05	gnomad	benign	non-cancer_pathogenic
ALDH16A1	A	231	G	A231G	8.34E-06	gnomad	benign	benign
ALDH16A1	A	231	V	A231V	2.58E-05	gnomad	benign	benign
ALDH16A1	L	233	Q	L233Q	8.33E-06	gnomad	cancer-risk	benign
ALDH16A1	V	234	L	V234L	4.16E-06	gnomad	benign	non-cancer_pathogenic
ALDH16A1	P	235	H	P235H	1.66E-05	gnomad	cancer-risk	non-cancer_pathogenic
ALDH16A1	A	238	T	A238T	4.15E-06	gnomad	benign	benign
ALDH16A1	A	238	V	A238V	4.14E-06	gnomad	benign	benign
ALDH16A1	P	241	L	P241L	4.12E-06	gnomad	benign	non-cancer_pathogenic
ALDH16A1	P	241	S	P241S	1.65E-05	gnomad	cancer-risk	non-cancer_pathogenic
ALDH16A1	G	242	E	G242E	8.24E-06	gnomad	cancer-risk	non-cancer_pathogenic
ALDH16A1	I	243	M	I243M	3.28E-05	gnomad	benign	non-cancer_pathogenic
ALDH16A1	I	243	T	I243T	4.12E-06	gnomad	benign	non-cancer_pathogenic
ALDH16A1	R	244	W	R244W	2.89E-05	gnomad	benign	non-cancer_pathogenic
ALDH16A1	A	247	T	A247T	1.24E-05	gnomad	benign	non-cancer_pathogenic
ALDH16A1	F	248	S	F248S	4.13E-06	gnomad	cancer-risk	non-cancer_pathogenic
ALDH16A1	C	249	G	C249G	2.89E-05	gnomad	cancer-risk	non-cancer_pathogenic
ALDH16A1	G	250	R	G250R	4.99E-05	gnomad	benign	non-cancer_pathogenic
ALDH16A1	P	252	L	P252L	4.05E-05	gnomad	benign	benign
ALDH16A1	G	255	A	G255A	9.73E-06	gnomad	benign	benign
ALDH16A1	G	255	E	G255E	9.73E-06	gnomad	cancer-risk	non-cancer_pathogenic
ALDH16A1	G	255	R	G255R	4.87E-06	gnomad	benign	non-cancer_pathogenic
ALDH16A1	R	256	G	R256G	4.95E-06	gnomad	cancer-risk	non-cancer_pathogenic
ALDH16A1	A	257	V	A257V	4.97E-06	gnomad	benign	benign
ALDH16A1	R	259	G	R259G	5.00E-06	gnomad	cancer-risk	non-cancer_pathogenic
ALDH16A1	R	260	W	R260W	0.000194	gnomad	benign	benign
ALDH16A1	S	261	R	S261R	1.53E-05	gnomad	benign	non-cancer_pathogenic
ALDH16A1	A	263	E	A263E	9.77E-05	gnomad	benign	non-cancer_pathogenic
ALDH16A1	A	263	T	A263T	9.29E-05	gnomad	benign	non-cancer_pathogenic
ALDH16A1	G	264	E	G264E	0.00071	gnomad	cancer-risk	non-cancer_pathogenic
ALDH16A1	G	264	V	G264V	1.02E-05	gnomad	cancer-risk	non-cancer_pathogenic
ALDH16A1	A	267	G	A267G	9.09E-06	gnomad	benign	benign
ALDH16A1	A	267	V	A267V	1.06E-05	gnomad	benign	non-cancer_pathogenic
ALDH16A1	L	269	M	L269M	2.67E-05	gnomad	cancer-risk	non-cancer_pathogenic
ALDH16A1	G	270	C	G270C	1.07E-05	gnomad	cancer-risk	benign
ALDH16A1	A	272	E	A272E	5.49E-06	gnomad	cancer-risk	benign
ALDH16A1	E	276	K	E276K	5.64E-06	gnomad	benign	benign
ALDH16A1	S	277	A	S277A	5.72E-06	gnomad	benign	benign
ALDH16A1	L	281	P	L281P	5.93E-06	gnomad	cancer-risk	non-cancer_pathogenic
ALDH16A1	T	282	M	T282M	3.20E-05	gnomad	benign	benign
ALDH16A1	T	284	M	T284M	9.59E-05	gnomad	benign	non-cancer_pathogenic
ALDH16A1	A	285	V	A285V	6.50E-06	gnomad	cancer-risk	non-cancer_pathogenic
ALDH16A1	V	287	A	V287A	6.67E-06	gnomad	cancer-risk	non-cancer_pathogenic
ALDH16A1	D	288	V	D288V	1.11E-05	gnomad	cancer-risk	non-cancer_pathogenic
ALDH16A1	S	289	T	S289T	0.0016	gnomad	cancer-risk	benign
ALDH16A1	A	290	V	A290V	3.19E-05	gnomad	cancer-risk	benign
ALDH16A1	V	291	M	V291M	0.00159	gnomad	cancer-risk	non-cancer_pathogenic
ALDH16A1	G	293	S	G293S	2.85E-05	gnomad	cancer-risk	benign
ALDH16A1	V	295	G	V295G	2.81E-05	gnomad	benign	non-cancer_pathogenic
ALDH16A1	V	295	M	V295M	4.22E-05	gnomad	cancer-risk	non-cancer_pathogenic
ALDH16A1	D	296	N	D296N	7.06E-06	gnomad	cancer-risk	non-cancer_pathogenic
ALDH16A1	A	297	P	A297P	3.19E-05	gnomad	benign	non-cancer_pathogenic
ALDH16A1	A	297	T	A297T	2.90E-05	gnomad	cancer-risk	non-cancer_pathogenic
ALDH16A1	A	298	V	A298V	3.19E-05	gnomad	cancer-risk	non-cancer_pathogenic
ALDH16A1	D	301	N	D301N	5.88E-05	gnomad	cancer-risk	benign
ALDH16A1	R	302	H	R302H	2.37E-05	gnomad	benign	non-cancer_pathogenic
ALDH16A1	P	304	S	P304S	7.35E-06	gnomad	benign	non-cancer_pathogenic
ALDH16A1	G	305	C	G305C	4.00E-06	gnomad	cancer-risk	non-cancer_pathogenic
ALDH16A1	G	305	V	G305V	4.00E-06	gnomad	cancer-risk	non-cancer_pathogenic
ALDH16A1	L	307	P	L307P	3.99E-06	gnomad	cancer-risk	non-cancer_pathogenic
ALDH16A1	I	311	V	I311V	3.19E-05	gnomad	cancer-risk	benign
ALDH16A1	Q	312	H	Q312H	3.99E-06	gnomad	cancer-risk	benign
ALDH16A1	E	313	A	E313A	7.97E-06	gnomad	cancer-risk	non-cancer_pathogenic
ALDH16A1	W	316	R	W316R	8.86E-05	gnomad	cancer-risk	non-cancer_pathogenic
ALDH16A1	A	319	V	A319V	0.000407	gnomad	cancer-risk	non-cancer_pathogenic
ALDH16A1	M	320	L	M320L	3.98E-06	gnomad	cancer-risk	benign
ALDH16A1	R	321	K	R321K	3.98E-06	gnomad	benign	non-cancer_pathogenic
ALDH16A1	R	322	Q	R322Q	1.59E-05	gnomad	benign	non-cancer_pathogenic
ALDH16A1	R	322	W	R322W	1.20E-05	gnomad	cancer-risk	non-cancer_pathogenic
ALDH16A1	R	326	P	R326P	7.98E-06	gnomad	benign	non-cancer_pathogenic
ALDH16A1	R	326	Q	R326Q	4.79E-05	gnomad	cancer-risk	non-cancer_pathogenic
ALDH16A1	R	331	P	R331P	8.00E-06	gnomad	benign	non-cancer_pathogenic
ALDH16A1	R	331	W	R331W	1.78E-05	gnomad	benign	non-cancer_pathogenic
ALDH16A1	R	334	G	R334G	4.01E-06	gnomad	cancer-risk	non-cancer_pathogenic
ALDH16A1	G	335	E	G335E	4.01E-06	gnomad	benign	non-cancer_pathogenic
ALDH16A1	L	336	V	L336V	8.03E-06	gnomad	cancer-risk	non-cancer_pathogenic
ALDH16A1	M	342	I	M342I	4.11E-06	gnomad	cancer-risk	benign
ALDH16A1	M	342	V	M342V	1.63E-05	gnomad	cancer-risk	non-cancer_pathogenic
ALDH16A1	A	344	T	A344T	1.23E-05	gnomad	benign	benign
ALDH16A1	R	345	P	R345P	3.30E-05	gnomad	benign	non-cancer_pathogenic
ALDH16A1	G	346	R	G346R	4.10E-06	gnomad	cancer-risk	non-cancer_pathogenic
ALDH16A1	A	347	T	A347T	0.000124	gnomad	benign	benign
ALDH16A1	A	349	T	A349T	2.19E-05	gnomad	benign	non-cancer_pathogenic
ALDH16A1	C	350	R	C350R	2.05E-05	gnomad	benign	benign
ALDH16A1	L	352	P	L352P	4.12E-06	gnomad	cancer-risk	benign
ALDH16A1	V	353	L	V353L	4.56E-05	gnomad	cancer-risk	non-cancer_pathogenic
ALDH16A1	Q	354	E	Q354E	1.25E-05	gnomad	cancer-risk	benign
ALDH16A1	R	355	C	R355C	8.40E-06	gnomad	cancer-risk	benign
ALDH16A1	R	355	G	R355G	3.19E-05	gnomad	cancer-risk	non-cancer_pathogenic
ALDH16A1	R	355	H	R355H	2.10E-05	gnomad	cancer-risk	benign
ALDH16A1	R	358	H	R358H	0.000128	gnomad	cancer-risk	non-cancer_pathogenic
ALDH16A1	Q	361	L	Q361L	4.33E-06	gnomad	cancer-risk	benign
ALDH16A1	S	362	R	S362R	3.19E-05	gnomad	cancer-risk	benign
ALDH16A1	G	364	C	G364C	9.11E-06	gnomad	cancer-risk	non-cancer_pathogenic
ALDH16A1	F	368	L	F368L	3.20E-05	gnomad	cancer-risk	non-cancer_pathogenic
ALDH16A1	G	371	R	G371R	3.99E-06	gnomad	cancer-risk	non-cancer_pathogenic
ALDH16A1	V	373	E	V373E	3.99E-06	gnomad	cancer-risk	non-cancer_pathogenic
ALDH16A1	V	373	L	V373L	1.60E-05	gnomad	benign	benign
ALDH16A1	Y	380	H	Y380H	3.99E-06	gnomad	benign	non-cancer_pathogenic
ALDH16A1	P	381	H	P381H	3.99E-06	gnomad	cancer-risk	non-cancer_pathogenic
ALDH16A1	T	383	A	T383A	1.60E-05	gnomad	cancer-risk	non-cancer_pathogenic
ALDH16A1	T	383	S	T383S	3.99E-06	gnomad	cancer-risk	non-cancer_pathogenic
ALDH16A1	P	389	R	P389R	3.19E-05	gnomad	benign	non-cancer_pathogenic
ALDH16A1	P	389	S	P389S	4.02E-06	gnomad	cancer-risk	benign
ALDH16A1	S	392	F	S392F	1.21E-05	gnomad	cancer-risk	non-cancer_pathogenic
ALDH16A1	C	394	G	C394G	4.05E-06	gnomad	cancer-risk	non-cancer_pathogenic
ALDH16A1	C	394	R	C394R	7.19E-06	gnomad	benign	non-cancer_pathogenic
ALDH16A1	W	401	R	W401R	6.38E-05	gnomad	benign	non-cancer_pathogenic
ALDH16A1	P	402	T	P402T	4.14E-06	gnomad	benign	non-cancer_pathogenic
ALDH16A1	V	403	L	V403L	6.59E-05	gnomad	benign	benign
ALDH16A1	V	403	M	V403M	4.14E-06	gnomad	benign	non-cancer_pathogenic
ALDH16A1	A	406	P	A406P	7.34E-06	gnomad	cancer-risk	non-cancer_pathogenic
ALDH16A1	S	407	F	S407F	1.66E-05	gnomad	cancer-risk	non-cancer_pathogenic
ALDH16A1	S	407	P	S407P	4.15E-06	gnomad	cancer-risk	non-cancer_pathogenic
ALDH16A1	P	408	H	P408H	4.14E-06	gnomad	cancer-risk	non-cancer_pathogenic
ALDH16A1	P	408	S	P408S	8.29E-06	gnomad	cancer-risk	benign
ALDH16A1	R	410	G	R410G	4.15E-06	gnomad	cancer-risk	non-cancer_pathogenic
ALDH16A1	R	410	H	R410H	0.000103	gnomad	cancer-risk	non-cancer_pathogenic
ALDH16A1	R	410	P	R410P	4.05E-05	gnomad	cancer-risk	non-cancer_pathogenic
ALDH16A1	T	411	A	T411A	8.31E-06	gnomad	benign	non-cancer_pathogenic
ALDH16A1	T	411	I	T411I	1.47E-05	gnomad	benign	benign
ALDH16A1	A	415	V	A415V	4.16E-06	gnomad	benign	non-cancer_pathogenic
ALDH16A1	L	416	P	L416P	8.33E-06	gnomad	benign	non-cancer_pathogenic
ALDH16A1	N	420	S	N420S	4.21E-06	gnomad	benign	non-cancer_pathogenic
ALDH16A1	G	421	R	G421R	1.27E-05	gnomad	cancer-risk	non-cancer_pathogenic
ALDH16A1	G	425	R	G425R	2.97E-05	gnomad	benign	non-cancer_pathogenic
ALDH16A1	A	428	T	A428T	1.28E-05	gnomad	benign	non-cancer_pathogenic
ALDH16A1	R	434	M	R434M	8.59E-06	gnomad	cancer-risk	benign
ALDH16A1	R	434	S	R434S	8.59E-06	gnomad	cancer-risk	benign
ALDH16A1	G	436	R	G436R	8.60E-06	gnomad	cancer-risk	non-cancer_pathogenic
ALDH16A1	Y	443	C	Y443C	4.30E-06	gnomad	benign	non-cancer_pathogenic
ALDH16A1	G	444	A	G444A	4.74E-05	gnomad	benign	benign
ALDH16A1	G	444	E	G444E	4.31E-06	gnomad	cancer-risk	non-cancer_pathogenic
ALDH16A1	V	447	M	V447M	4.43E-06	gnomad	benign	benign
ALDH16A1	V	450	L	V450L	4.17E-05	gnomad	benign	non-cancer_pathogenic
ALDH16A1	W	451	R	W451R	1.71E-05	gnomad	benign	non-cancer_pathogenic
ALDH16A1	I	452	M	I452M	1.50E-05	gnomad	benign	non-cancer_pathogenic
ALDH16A1	A	454	T	A454T	4.45E-05	gnomad	benign	benign
ALDH16A1	G	456	S	G456S	1.66E-05	gnomad	cancer-risk	non-cancer_pathogenic
ALDH16A1	R	458	K	R458K	4.10E-06	gnomad	cancer-risk	benign
ALDH16A1	D	459	V	D459V	0.00381	gnomad	cancer-risk	non-cancer_pathogenic
ALDH16A1	V	462	M	V462M	1.22E-05	gnomad	benign	non-cancer_pathogenic
ALDH16A1	T	464	R	T464R	8.09E-06	gnomad	cancer-risk	non-cancer_pathogenic
ALDH16A1	G	466	S	G466S	1.21E-05	gnomad	benign	benign
ALDH16A1	C	467	R	C467R	1.61E-05	gnomad	cancer-risk	non-cancer_pathogenic
ALDH16A1	K	468	M	K468M	4.01E-06	gnomad	cancer-risk	non-cancer_pathogenic
ALDH16A1	E	469	K	E469K	7.13E-06	gnomad	cancer-risk	non-cancer_pathogenic
ALDH16A1	S	470	N	S470N	4.01E-06	gnomad	benign	non-cancer_pathogenic
ALDH16A1	G	471	R	G471R	4.01E-06	gnomad	cancer-risk	non-cancer_pathogenic
ALDH16A1	C	472	Y	C472Y	4.01E-06	gnomad	benign	benign
ALDH16A1	S	473	P	S473P	4.01E-06	gnomad	cancer-risk	non-cancer_pathogenic
ALDH16A1	G	476	E	G476E	4.00E-06	gnomad	benign	non-cancer_pathogenic
ALDH16A1	G	476	R	G476R	3.91E-05	gnomad	benign	non-cancer_pathogenic
ALDH16A1	G	477	D	G477D	2.40E-05	gnomad	cancer-risk	non-cancer_pathogenic
ALDH16A1	P	478	R	P478R	7.99E-06	gnomad	cancer-risk	benign
ALDH16A1	D	479	G	D479G	0.000348	gnomad	cancer-risk	non-cancer_pathogenic
ALDH16A1	D	479	N	D479N	4.00E-06	gnomad	benign	non-cancer_pathogenic
ALDH16A1	R	486	P	R486P	2.39E-05	gnomad	benign	benign
ALDH16A1	R	486	Q	R486Q	1.77E-05	gnomad	cancer-risk	benign
ALDH16A1	R	486	W	R486W	7.43E-05	gnomad	benign	benign
ALDH16A1	S	488	T	S488T	0.00106	gnomad	benign	benign
ALDH16A1	G	489	E	G489E	3.98E-06	gnomad	cancer-risk	non-cancer_pathogenic
ALDH16A1	A	492	G	A492G	1.19E-05	gnomad	benign	benign
ALDH16A1	R	493	L	R493L	2.12E-05	gnomad	benign	benign
ALDH16A1	R	493	W	R493W	0.000407	gnomad	benign	benign
ALDH16A1	S	495	F	S495F	1.19E-05	gnomad	cancer-risk	non-cancer_pathogenic
ALDH16A1	L	497	F	L497F	3.98E-06	gnomad	cancer-risk	benign
ALDH16A1	N	500	K	N500K	3.98E-06	gnomad	cancer-risk	benign
ALDH16A1	N	502	I	N502I	3.98E-06	gnomad	cancer-risk	benign
ALDH16A1	N	502	S	N502S	2.78E-05	gnomad	cancer-risk	benign
ALDH16A1	Y	503	H	Y503H	1.77E-05	gnomad	cancer-risk	non-cancer_pathogenic
ALDH16A1	A	509	D	A509D	3.18E-05	gnomad	cancer-risk	benign
ALDH16A1	A	509	T	A509T	0.000103	gnomad	benign	benign
ALDH16A1	V	510	A	V510A	1.19E-05	gnomad	benign	benign
ALDH16A1	T	513	I	T513I	7.96E-06	gnomad	benign	benign
ALDH16A1	P	515	L	P515L	5.66E-05	gnomad	cancer-risk	benign
ALDH16A1	A	516	S	A516S	3.18E-05	gnomad	benign	benign
ALDH16A1	A	516	T	A516T	3.98E-06	gnomad	benign	benign
ALDH16A1	G	517	R	G517R	0.000368	gnomad	cancer-risk	non-cancer_pathogenic
ALDH16A1	I	520	T	I520T	7.96E-06	gnomad	benign	benign
ALDH16A1	G	521	R	G521R	3.98E-06	gnomad	cancer-risk	non-cancer_pathogenic
ALDH16A1	S	523	G	S523G	1.06E-05	gnomad	benign	benign
ALDH16A1	P	526	A	P526A	3.19E-05	gnomad	cancer-risk	benign
ALDH16A1	P	527	A	P527A	8.00E-06	gnomad	cancer-risk	non-cancer_pathogenic
ALDH16A1	P	527	H	P527H	4.26E-05	gnomad	cancer-risk	non-cancer_pathogenic
ALDH16A1	P	527	R	P527R	0.00214	gnomad	cancer-risk	non-cancer_pathogenic
ALDH16A1	P	527	S	P527S	4.00E-06	gnomad	cancer-risk	non-cancer_pathogenic
ALDH16A1	Y	528	F	Y528F	1.20E-05	gnomad	benign	non-cancer_pathogenic
ALDH16A1	Y	528	N	Y528N	3.19E-05	gnomad	benign	non-cancer_pathogenic
ALDH16A1	V	532	A	V532A	1.77E-05	gnomad	benign	non-cancer_pathogenic
ALDH16A1	Q	537	R	Q537R	7.97E-06	gnomad	cancer-risk	non-cancer_pathogenic
ALDH16A1	A	538	P	A538P	7.97E-06	gnomad	cancer-risk	benign
ALDH16A1	A	538	T	A538T	3.99E-06	gnomad	benign	benign
ALDH16A1	A	538	V	A538V	3.99E-06	gnomad	benign	non-cancer_pathogenic
ALDH16A1	A	541	T	A541T	3.98E-06	gnomad	benign	benign
ALDH16A1	R	542	G	R542G	1.59E-05	gnomad	cancer-risk	benign
ALDH16A1	R	545	T	R545T	1.42E-05	gnomad	cancer-risk	non-cancer_pathogenic
ALDH16A1	I	547	V	I547V	1.19E-05	gnomad	benign	benign
ALDH16A1	R	548	Q	R548Q	8.14E-05	gnomad	cancer-risk	benign
ALDH16A1	N	553	K	N553K	3.99E-06	gnomad	cancer-risk	benign
ALDH16A1	G	556	V	G556V	3.19E-05	gnomad	cancer-risk	non-cancer_pathogenic
ALDH16A1	V	558	M	V558M	1.59E-05	gnomad	benign	non-cancer_pathogenic
ALDH16A1	G	561	D	G561D	7.97E-06	gnomad	cancer-risk	non-cancer_pathogenic
ALDH16A1	G	562	R	G562R	1.06E-05	gnomad	cancer-risk	non-cancer_pathogenic
ALDH16A1	A	563	P	A563P	3.99E-06	gnomad	cancer-risk	benign
ALDH16A1	R	567	G	R567G	3.99E-06	gnomad	cancer-risk	non-cancer_pathogenic
ALDH16A1	R	567	P	R567P	7.98E-06	gnomad	benign	non-cancer_pathogenic
ALDH16A1	R	567	Q	R567Q	2.39E-05	gnomad	cancer-risk	non-cancer_pathogenic
ALDH16A1	G	568	D	G568D	3.99E-06	gnomad	cancer-risk	benign
ALDH16A1	G	568	S	G568S	3.99E-06	gnomad	benign	benign
ALDH16A1	V	570	M	V570M	3.99E-06	gnomad	cancer-risk	non-cancer_pathogenic
ALDH16A1	E	571	D	E571D	4.97E-05	gnomad	benign	non-cancer_pathogenic
ALDH16A1	E	571	K	E571K	4.00E-06	gnomad	benign	non-cancer_pathogenic
ALDH16A1	Q	575	R	Q575R	4.01E-06	gnomad	cancer-risk	non-cancer_pathogenic
ALDH16A1	P	578	R	P578R	4.03E-06	gnomad	benign	benign
ALDH16A1	G	579	S	G579S	1.62E-05	gnomad	benign	benign
ALDH16A1	W	580	R	W580R	6.99E-06	gnomad	benign	non-cancer_pathogenic
ALDH16A1	G	582	C	G582C	6.92E-06	gnomad	cancer-risk	benign
ALDH16A1	G	582	S	G582S	6.92E-06	gnomad	benign	benign
ALDH16A1	G	582	V	G582V	3.19E-05	gnomad	cancer-risk	benign
ALDH16A1	S	584	Y	S584Y	6.83E-06	gnomad	cancer-risk	benign
ALDH16A1	P	585	L	P585L	7.25E-05	gnomad	benign	non-cancer_pathogenic
ALDH16A1	R	588	Q	R588Q	1.33E-05	gnomad	cancer-risk	non-cancer_pathogenic
ALDH16A1	R	588	W	R588W	2.20E-05	gnomad	benign	non-cancer_pathogenic
ALDH16A1	A	589	E	A589E	3.19E-05	gnomad	benign	non-cancer_pathogenic
ALDH16A1	A	594	P	A594P	0.000531	gnomad	cancer-risk	non-cancer_pathogenic
ALDH16A1	A	594	V	A594V	2.13E-05	gnomad	cancer-risk	non-cancer_pathogenic
ALDH16A1	A	596	E	A596E	6.33E-06	gnomad	cancer-risk	non-cancer_pathogenic
ALDH16A1	A	596	V	A596V	1.90E-05	gnomad	cancer-risk	non-cancer_pathogenic
ALDH16A1	A	598	P	A598P	3.19E-05	gnomad	cancer-risk	non-cancer_pathogenic
ALDH16A1	E	600	A	E600A	6.22E-06	gnomad	cancer-risk	benign
ALDH16A1	R	601	H	R601H	3.62E-05	gnomad	cancer-risk	non-cancer_pathogenic
ALDH16A1	R	602	Q	R602Q	4.11E-05	gnomad	benign	non-cancer_pathogenic
ALDH16A1	R	602	W	R602W	1.23E-05	gnomad	cancer-risk	non-cancer_pathogenic
ALDH16A1	K	603	N	K603N	1.22E-05	gnomad	benign	benign
ALDH16A1	S	608	W	S608W	6.03E-06	gnomad	cancer-risk	non-cancer_pathogenic
ALDH16A1	Q	613	P	Q613P	6.32E-06	gnomad	cancer-risk	benign
ALDH16A1	K	618	E	K618E	1.33E-05	gnomad	cancer-risk	benign
ALDH16A1	A	619	V	A619V	6.81E-06	gnomad	cancer-risk	benign
ALDH16A1	A	620	E	A620E	7.07E-06	gnomad	cancer-risk	non-cancer_pathogenic
ALDH16A1	A	620	V	A620V	0.00026	gnomad	cancer-risk	non-cancer_pathogenic
ALDH16A1	V	624	L	V624L	3.19E-05	gnomad	cancer-risk	non-cancer_pathogenic
ALDH16A1	A	628	T	A628T	3.26E-05	gnomad	benign	benign
ALDH16A1	R	630	Q	R630Q	3.62E-05	gnomad	cancer-risk	non-cancer_pathogenic
ALDH16A1	R	637	Q	R637Q	0.000143	gnomad	cancer-risk	non-cancer_pathogenic
ALDH16A1	A	640	V	A640V	1.75E-05	gnomad	benign	benign
ALDH16A1	A	648	G	A648G	4.19E-06	gnomad	benign	non-cancer_pathogenic
ALDH16A1	A	648	P	A648P	3.19E-05	gnomad	cancer-risk	benign
ALDH16A1	G	649	R	G649R	7.96E-05	gnomad	benign	non-cancer_pathogenic
ALDH16A1	P	653	L	P653L	7.38E-06	gnomad	benign	non-cancer_pathogenic
ALDH16A1	L	655	P	L655P	4.16E-06	gnomad	cancer-risk	non-cancer_pathogenic
ALDH16A1	R	656	C	R656C	4.17E-06	gnomad	cancer-risk	benign
ALDH16A1	R	656	H	R656H	1.84E-05	gnomad	cancer-risk	non-cancer_pathogenic
ALDH16A1	R	656	S	R656S	4.17E-06	gnomad	cancer-risk	benign
ALDH16A1	R	658	P	R658P	3.20E-05	gnomad	cancer-risk	benign
ALDH16A1	P	660	L	P660L	2.07E-05	gnomad	benign	non-cancer_pathogenic
ALDH16A1	P	660	T	P660T	4.15E-06	gnomad	benign	non-cancer_pathogenic
ALDH16A1	V	663	G	V663G	4.14E-06	gnomad	cancer-risk	non-cancer_pathogenic
ALDH16A1	V	663	M	V663M	4.14E-06	gnomad	benign	non-cancer_pathogenic
ALDH16A1	A	665	T	A665T	4.13E-06	gnomad	benign	non-cancer_pathogenic
ALDH16A1	D	670	E	D670E	1.24E-05	gnomad	benign	benign
ALDH16A1	E	671	G	E671G	7.30E-05	gnomad	benign	non-cancer_pathogenic
ALDH16A1	E	671	K	E671K	2.92E-05	gnomad	benign	benign
ALDH16A1	E	671	Q	E671Q	4.12E-06	gnomad	cancer-risk	non-cancer_pathogenic
ALDH16A1	P	673	S	P673S	4.12E-06	gnomad	cancer-risk	non-cancer_pathogenic
ALDH16A1	L	674	P	L674P	4.11E-06	gnomad	benign	non-cancer_pathogenic
ALDH16A1	L	674	V	L674V	7.29E-06	gnomad	benign	non-cancer_pathogenic
ALDH16A1	F	677	L	F677L	4.11E-06	gnomad	cancer-risk	non-cancer_pathogenic
ALDH16A1	V	678	L	V678L	8.22E-06	gnomad	cancer-risk	non-cancer_pathogenic
ALDH16A1	S	679	F	S679F	4.10E-06	gnomad	benign	non-cancer_pathogenic
ALDH16A1	L	680	M	L680M	1.23E-05	gnomad	cancer-risk	non-cancer_pathogenic
ALDH16A1	A	682	V	A682V	4.10E-06	gnomad	cancer-risk	non-cancer_pathogenic
ALDH16A1	Y	687	C	Y687C	5.73E-05	gnomad	benign	non-cancer_pathogenic
ALDH16A1	N	689	S	N689S	4.09E-06	gnomad	benign	non-cancer_pathogenic
ALDH16A1	V	692	F	V692F	4.09E-06	gnomad	cancer-risk	non-cancer_pathogenic
ALDH16A1	M	693	I	M693I	8.18E-06	gnomad	cancer-risk	benign
ALDH16A1	M	693	T	M693T	2.45E-05	gnomad	cancer-risk	non-cancer_pathogenic
ALDH16A1	V	694	L	V694L	4.09E-06	gnomad	benign	non-cancer_pathogenic
ALDH16A1	V	694	M	V694M	3.19E-05	gnomad	benign	non-cancer_pathogenic
ALDH16A1	P	695	R	P695R	4.09E-06	gnomad	benign	non-cancer_pathogenic
ALDH16A1	S	696	G	S696G	3.19E-05	gnomad	cancer-risk	benign
ALDH16A1	A	697	T	A697T	4.10E-06	gnomad	cancer-risk	non-cancer_pathogenic
ALDH16A1	L	701	P	L701P	4.10E-06	gnomad	benign	non-cancer_pathogenic
ALDH16A1	E	705	K	E705K	3.29E-05	gnomad	cancer-risk	non-cancer_pathogenic
ALDH16A1	V	706	A	V706A	0.000751	gnomad	cancer-risk	non-cancer_pathogenic
ALDH16A1	V	706	D	V706D	8.23E-06	gnomad	cancer-risk	non-cancer_pathogenic
ALDH16A1	V	706	F	V706F	3.29E-05	gnomad	benign	benign
ALDH16A1	C	707	Y	C707Y	4.12E-06	gnomad	benign	benign
ALDH16A1	D	709	V	D709V	3.98E-06	gnomad	cancer-risk	benign
ALDH16A1	M	710	T	M710T	1.77E-05	gnomad	cancer-risk	non-cancer_pathogenic
ALDH16A1	M	710	V	M710V	2.39E-05	gnomad	cancer-risk	benign
ALDH16A1	A	711	T	A711T	7.97E-06	gnomad	benign	non-cancer_pathogenic
ALDH16A1	T	712	S	T712S	3.98E-06	gnomad	benign	non-cancer_pathogenic
ALDH16A1	G	717	S	G717S	3.98E-06	gnomad	cancer-risk	non-cancer_pathogenic
ALDH16A1	A	719	T	A719T	7.96E-06	gnomad	cancer-risk	non-cancer_pathogenic
ALDH16A1	N	720	I	N720I	3.98E-06	gnomad	cancer-risk	non-cancer_pathogenic
ALDH16A1	V	721	L	V721L	3.98E-06	gnomad	cancer-risk	non-cancer_pathogenic
ALDH16A1	V	721	M	V721M	9.55E-05	gnomad	cancer-risk	non-cancer_pathogenic
ALDH16A1	V	722	A	V722A	3.98E-06	gnomad	benign	non-cancer_pathogenic
ALDH16A1	V	722	M	V722M	0.000127	gnomad	benign	non-cancer_pathogenic
ALDH16A1	D	725	H	D725H	3.18E-05	gnomad	benign	non-cancer_pathogenic
ALDH16A1	R	726	G	R726G	7.96E-06	gnomad	cancer-risk	non-cancer_pathogenic
ALDH16A1	R	726	Q	R726Q	1.19E-05	gnomad	benign	non-cancer_pathogenic
ALDH16A1	D	727	E	D727E	3.89E-05	gnomad	cancer-risk	non-cancer_pathogenic
ALDH16A1	H	728	R	H728R	3.98E-06	gnomad	cancer-risk	non-cancer_pathogenic
ALDH16A1	H	728	Y	H728Y	3.19E-05	gnomad	cancer-risk	non-cancer_pathogenic
ALDH16A1	R	731	C	R731C	7.96E-06	gnomad	cancer-risk	non-cancer_pathogenic
ALDH16A1	R	731	H	R731H	7.96E-06	gnomad	cancer-risk	non-cancer_pathogenic
ALDH16A1	V	739	I	V739I	1.19E-05	gnomad	cancer-risk	benign
ALDH16A1	V	739	L	V739L	3.98E-06	gnomad	cancer-risk	non-cancer_pathogenic
ALDH16A1	Q	740	R	Q740R	3.18E-05	gnomad	cancer-risk	non-cancer_pathogenic
ALDH16A1	M	742	T	M742T	7.97E-06	gnomad	benign	non-cancer_pathogenic
ALDH16A1	G	750	C	G750C	1.61E-05	gnomad	cancer-risk	non-cancer_pathogenic
ALDH16A1	V	754	L	V754L	8.02E-06	gnomad	benign	non-cancer_pathogenic
ALDH16A1	W	756	G	W756G	4.01E-06	gnomad	benign	non-cancer_pathogenic
ALDH16A1	W	756	R	W756R	8.02E-06	gnomad	benign	benign
ALDH16A1	A	757	V	A757V	3.21E-05	gnomad	benign	benign
ALDH16A1	S	758	L	S758L	4.01E-06	gnomad	cancer-risk	non-cancer_pathogenic
ALDH16A1	G	760	A	G760A	4.01E-06	gnomad	cancer-risk	benign
ALDH16A1	G	760	E	G760E	4.41E-05	gnomad	cancer-risk	non-cancer_pathogenic
ALDH16A1	P	764	L	P764L	3.21E-05	gnomad	benign	non-cancer_pathogenic
ALDH16A1	V	765	A	V765A	4.02E-06	gnomad	benign	non-cancer_pathogenic
ALDH16A1	V	765	G	V765G	4.02E-06	gnomad	cancer-risk	non-cancer_pathogenic
ALDH16A1	V	765	M	V765M	7.14E-06	gnomad	benign	non-cancer_pathogenic
ALDH16A1	A	767	T	A767T	1.21E-05	gnomad	benign	benign
ALDH16A1	A	767	V	A767V	0.000232	gnomad	benign	benign
ALDH16A1	R	769	G	R769G	2.82E-05	gnomad	cancer-risk	non-cancer_pathogenic
ALDH16A1	R	769	K	R769K	2.15E-05	gnomad	benign	non-cancer_pathogenic
ALDH16A1	G	770	S	G770S	7.16E-06	gnomad	benign	non-cancer_pathogenic
ALDH16A1	G	770	V	G770V	4.04E-06	gnomad	cancer-risk	non-cancer_pathogenic
ALDH16A1	R	773	L	R773L	2.42E-05	gnomad	benign	benign
ALDH16A1	R	773	Q	R773Q	1.62E-05	gnomad	cancer-risk	non-cancer_pathogenic
ALDH16A1	Q	777	R	Q777R	4.05E-06	gnomad	cancer-risk	non-cancer_pathogenic
ALDH16A1	E	780	D	E780D	4.06E-06	gnomad	cancer-risk	non-cancer_pathogenic
ALDH16A1	G	783	A	G783A	8.18E-06	gnomad	benign	non-cancer_pathogenic
ALDH16A1	L	786	R	L786R	4.15E-06	gnomad	cancer-risk	non-cancer_pathogenic
ALDH16A1	L	786	V	L786V	4.13E-06	gnomad	benign	non-cancer_pathogenic
ALDH16A1	R	789	P	R789P	1.25E-05	gnomad	cancer-risk	non-cancer_pathogenic
ALDH16A1	R	789	Q	R789Q	5.44E-05	gnomad	cancer-risk	benign
ALDH16A1	R	792	G	R792G	7.47E-06	gnomad	benign	non-cancer_pathogenic
ALDH16A1	R	792	P	R792P	4.23E-06	gnomad	benign	non-cancer_pathogenic
ALDH16A1	R	792	Q	R792Q	1.69E-05	gnomad	cancer-risk	benign
ALDH16A1	K	794	E	K794E	4.25E-06	gnomad	cancer-risk	non-cancer_pathogenic
ALDH16A1	A	795	G	A795G	4.35E-06	gnomad	benign	benign
ALDH16A1	A	795	V	A795V	4.35E-06	gnomad	benign	non-cancer_pathogenic
ALDH16A1	P	799	R	P799R	9.36E-06	gnomad	cancer-risk	non-cancer_pathogenic
ALDH16A1	G	801	V	G801V	9.64E-06	gnomad	cancer-risk	non-cancer_pathogenic
ALDH18A1	S	3	I	S3I	3.98E-06	gnomad	cancer-risk	non-cancer_pathogenic
ALDH18A1	V	5	A	V5A	3.19E-05	gnomad	benign	benign
ALDH18A1	R	7	C	R7C	2.39E-05	gnomad	benign	benign
ALDH18A1	R	7	H	R7H	3.18E-05	gnomad	benign	non-cancer_pathogenic
ALDH18A1	R	7	L	R7L	3.98E-06	gnomad	benign	benign
ALDH18A1	R	7	P	R7P	1.59E-05	gnomad	benign	non-cancer_pathogenic
ALDH18A1	F	13	I	F13I	0.000215	gnomad	benign	non-cancer_pathogenic
ALDH18A1	H	16	L	H16L	3.98E-06	gnomad	benign	non-cancer_pathogenic
ALDH18A1	V	21	F	V21F	1.59E-05	gnomad	benign	benign
ALDH18A1	V	21	I	V21I	3.98E-06	gnomad	cancer-risk	benign
ALDH18A1	C	23	Y	C23Y	3.20E-05	gnomad	benign	benign
ALDH18A1	T	24	I	T24I	3.20E-05	gnomad	benign	benign
ALDH18A1	V	26	I	V26I	0.000239	gnomad	cancer-risk	non-cancer_pathogenic
ALDH18A1	R	28	G	R28G	7.95E-06	gnomad	cancer-risk	non-cancer_pathogenic
ALDH18A1	S	29	F	S29F	3.98E-06	gnomad	cancer-risk	benign
ALDH18A1	I	32	T	I32T	2.40E-05	gnomad	benign	benign
ALDH18A1	V	36	A	V36A	3.99E-06	gnomad	cancer-risk	benign
ALDH18A1	H	39	Q	H39Q	3.99E-06	gnomad	cancer-risk	benign
ALDH18A1	R	41	G	R41G	1.20E-05	gnomad	benign	non-cancer_pathogenic
ALDH18A1	R	41	H	R41H	8.50E-05	gnomad	benign	non-cancer_pathogenic
ALDH18A1	S	44	G	S44G	7.97E-06	gnomad	cancer-risk	benign
ALDH18A1	N	45	S	N45S	3.98E-06	gnomad	benign	benign
ALDH18A1	T	50	A	T50A	9.20E-05	gnomad	benign	benign
ALDH18A1	H	57	N	H57N	3.18E-05	gnomad	benign	benign
ALDH18A1	K	59	Q	K59Q	3.98E-06	gnomad	benign	benign
ALDH18A1	S	60	P	S60P	3.98E-06	gnomad	cancer-risk	benign
ALDH18A1	A	62	V	A62V	3.98E-06	gnomad	cancer-risk	benign
ALDH18A1	R	64	C	R64C	2.79E-05	gnomad	cancer-risk	non-cancer_pathogenic
ALDH18A1	S	65	I	S65I	0.000156	gnomad	benign	benign
ALDH18A1	V	74	L	V74L	7.07E-06	gnomad	cancer-risk	non-cancer_pathogenic
ALDH18A1	G	85	E	G85E	3.98E-06	gnomad	cancer-risk	non-cancer_pathogenic
ALDH18A1	E	87	K	E87K	2.79E-05	gnomad	benign	benign
ALDH18A1	E	100	K	E100K	3.18E-05	gnomad	cancer-risk	non-cancer_pathogenic
ALDH18A1	V	102	I	V102I	3.99E-06	gnomad	cancer-risk	benign
ALDH18A1	V	104	M	V104M	3.99E-06	gnomad	cancer-risk	benign
ALDH18A1	M	113	L	M113L	3.98E-06	gnomad	cancer-risk	benign
ALDH18A1	A	119	V	A119V	3.98E-06	gnomad	benign	benign
ALDH18A1	R	128	H	R128H	1.77E-05	gnomad	cancer-risk	non-cancer_pathogenic
ALDH18A1	H	129	R	H129R	3.98E-06	gnomad	cancer-risk	benign
ALDH18A1	L	141	V	L141V	3.98E-06	gnomad	cancer-risk	non-cancer_pathogenic
ALDH18A1	G	144	V	G144V	7.96E-06	gnomad	cancer-risk	non-cancer_pathogenic
ALDH18A1	E	150	K	E150K	3.98E-06	gnomad	benign	non-cancer_pathogenic
ALDH18A1	A	152	V	A152V	3.98E-06	gnomad	cancer-risk	non-cancer_pathogenic
ALDH18A1	P	154	L	P154L	3.98E-06	gnomad	cancer-risk	non-cancer_pathogenic
ALDH18A1	L	156	V	L156V	3.98E-06	gnomad	cancer-risk	benign
ALDH18A1	R	159	G	R159G	6.00E-05	gnomad	benign	non-cancer_pathogenic
ALDH18A1	S	181	G	S181G	7.97E-06	gnomad	cancer-risk	benign
ALDH18A1	A	184	V	A184V	8.38E-05	gnomad	cancer-risk	non-cancer_pathogenic
ALDH18A1	N	191	S	N191S	1.19E-05	gnomad	cancer-risk	benign
ALDH18A1	R	200	C	R200C	1.19E-05	gnomad	cancer-risk	non-cancer_pathogenic
ALDH18A1	R	201	W	R201W	1.06E-05	gnomad	cancer-risk	benign
ALDH18A1	N	202	Y	N202Y	3.98E-06	gnomad	cancer-risk	non-cancer_pathogenic
ALDH18A1	N	204	S	N204S	7.96E-06	gnomad	cancer-risk	non-cancer_pathogenic
ALDH18A1	H	208	R	H208R	3.98E-06	gnomad	cancer-risk	non-cancer_pathogenic
ALDH18A1	R	212	G	R212G	7.96E-06	gnomad	benign	non-cancer_pathogenic
ALDH18A1	D	223	G	D223G	3.98E-06	gnomad	cancer-risk	non-cancer_pathogenic
ALDH18A1	P	228	R	P228R	3.98E-06	gnomad	benign	non-cancer_pathogenic
ALDH18A1	A	229	T	A229T	3.98E-06	gnomad	benign	non-cancer_pathogenic
ALDH18A1	E	230	D	E230D	3.18E-05	gnomad	benign	benign
ALDH18A1	P	231	A	P231A	3.98E-06	gnomad	cancer-risk	benign
ALDH18A1	P	231	S	P231S	3.98E-06	gnomad	cancer-risk	non-cancer_pathogenic
ALDH18A1	G	237	W	G237W	2.39E-05	gnomad	cancer-risk	benign
ALDH18A1	V	255	L	V255L	3.98E-06	gnomad	cancer-risk	non-cancer_pathogenic
ALDH18A1	L	261	I	L261I	7.96E-06	gnomad	cancer-risk	benign
ALDH18A1	L	262	F	L262F	1.06E-05	gnomad	cancer-risk	non-cancer_pathogenic
ALDH18A1	S	274	N	S274N	3.99E-06	gnomad	benign	non-cancer_pathogenic
ALDH18A1	P	276	S	P276S	3.99E-06	gnomad	cancer-risk	non-cancer_pathogenic
ALDH18A1	P	276	T	P276T	3.99E-06	gnomad	cancer-risk	non-cancer_pathogenic
ALDH18A1	D	280	G	D280G	1.06E-05	gnomad	cancer-risk	non-cancer_pathogenic
ALDH18A1	D	280	V	D280V	3.98E-06	gnomad	benign	non-cancer_pathogenic
ALDH18A1	A	281	V	A281V	7.96E-06	gnomad	cancer-risk	benign
ALDH18A1	L	283	F	L283F	2.12E-05	gnomad	cancer-risk	non-cancer_pathogenic
ALDH18A1	I	286	V	I286V	7.07E-06	gnomad	cancer-risk	benign
ALDH18A1	D	291	N	D291N	3.98E-06	gnomad	benign	non-cancer_pathogenic
ALDH18A1	S	294	F	S294F	3.98E-06	gnomad	cancer-risk	benign
ALDH18A1	T	296	I	T296I	3.98E-06	gnomad	benign	non-cancer_pathogenic
ALDH18A1	S	301	A	S301A	3.98E-06	gnomad	cancer-risk	benign
ALDH18A1	V	303	M	V303M	7.95E-06	gnomad	benign	non-cancer_pathogenic
ALDH18A1	G	306	V	G306V	7.95E-06	gnomad	cancer-risk	non-cancer_pathogenic
ALDH18A1	V	312	M	V312M	7.98E-06	gnomad	benign	non-cancer_pathogenic
ALDH18A1	Q	320	R	Q320R	3.54E-05	gnomad	cancer-risk	non-cancer_pathogenic
ALDH18A1	G	321	A	G321A	3.98E-06	gnomad	cancer-risk	benign
ALDH18A1	T	323	A	T323A	1.06E-05	gnomad	benign	benign
ALDH18A1	T	323	S	T323S	3.98E-06	gnomad	benign	benign
ALDH18A1	N	329	S	N329S	4.95E-05	gnomad	benign	non-cancer_pathogenic
ALDH18A1	T	331	P	T331P	7.96E-06	gnomad	benign	non-cancer_pathogenic
ALDH18A1	T	331	S	T331S	3.98E-06	gnomad	benign	benign
ALDH18A1	H	332	Y	H332Y	2.39E-05	gnomad	benign	non-cancer_pathogenic
ALDH18A1	P	333	A	P333A	3.98E-06	gnomad	cancer-risk	benign
ALDH18A1	V	339	F	V339F	7.96E-06	gnomad	cancer-risk	benign
ALDH18A1	V	339	I	V339I	3.98E-06	gnomad	cancer-risk	benign
ALDH18A1	T	341	A	T341A	3.98E-06	gnomad	benign	non-cancer_pathogenic
ALDH18A1	T	341	K	T341K	3.98E-06	gnomad	benign	non-cancer_pathogenic
ALDH18A1	D	342	N	D342N	3.98E-06	gnomad	cancer-risk	non-cancer_pathogenic
ALDH18A1	I	343	L	I343L	3.98E-06	gnomad	benign	benign
ALDH18A1	I	343	V	I343V	1.19E-05	gnomad	benign	benign
ALDH18A1	V	344	M	V344M	3.98E-06	gnomad	benign	non-cancer_pathogenic
ALDH18A1	G	346	E	G346E	3.98E-06	gnomad	cancer-risk	non-cancer_pathogenic
ALDH18A1	V	349	F	V349F	3.98E-06	gnomad	cancer-risk	benign
ALDH18A1	V	349	I	V349I	3.98E-06	gnomad	cancer-risk	benign
ALDH18A1	T	351	I	T351I	3.98E-06	gnomad	benign	benign
ALDH18A1	P	358	T	P358T	3.98E-06	gnomad	benign	non-cancer_pathogenic
ALDH18A1	Q	366	R	Q366R	3.98E-06	gnomad	benign	non-cancer_pathogenic
ALDH18A1	M	369	T	M369T	1.41E-05	gnomad	benign	non-cancer_pathogenic
ALDH18A1	R	371	P	R371P	3.98E-06	gnomad	benign	non-cancer_pathogenic
ALDH18A1	S	372	P	S372P	3.98E-06	gnomad	benign	non-cancer_pathogenic
ALDH18A1	S	372	Y	S372Y	0.017	gnomad	benign	non-cancer_pathogenic
ALDH18A1	T	379	I	T379I	3.98E-06	gnomad	benign	non-cancer_pathogenic
ALDH18A1	R	385	K	R385K	3.19E-05	gnomad	benign	benign
ALDH18A1	R	385	T	R385T	3.98E-06	gnomad	cancer-risk	non-cancer_pathogenic
ALDH18A1	A	386	V	A386V	3.98E-06	gnomad	cancer-risk	benign
ALDH18A1	H	391	R	H391R	5.30E-05	gnomad	cancer-risk	benign
ALDH18A1	A	393	T	A393T	3.98E-06	gnomad	benign	benign
ALDH18A1	D	394	G	D394G	7.95E-06	gnomad	cancer-risk	non-cancer_pathogenic
ALDH18A1	R	400	C	R400C	1.59E-05	gnomad	cancer-risk	benign
ALDH18A1	D	401	G	D401G	3.19E-05	gnomad	benign	non-cancer_pathogenic
ALDH18A1	D	401	N	D401N	3.98E-06	gnomad	cancer-risk	non-cancer_pathogenic
ALDH18A1	I	403	T	I403T	3.98E-06	gnomad	benign	benign
ALDH18A1	I	403	V	I403V	3.98E-06	gnomad	cancer-risk	benign
ALDH18A1	A	406	D	A406D	3.98E-06	gnomad	cancer-risk	non-cancer_pathogenic
ALDH18A1	N	407	D	N407D	3.98E-06	gnomad	cancer-risk	benign
ALDH18A1	K	408	I	K408I	3.18E-05	gnomad	cancer-risk	benign
ALDH18A1	K	408	Q	K408Q	3.98E-06	gnomad	benign	benign
ALDH18A1	K	409	E	K409E	3.98E-06	gnomad	cancer-risk	benign
ALDH18A1	L	411	F	L411F	7.95E-06	gnomad	cancer-risk	benign
ALDH18A1	E	412	G	E412G	3.98E-06	gnomad	cancer-risk	non-cancer_pathogenic
ALDH18A1	E	413	K	E413K	3.53E-05	gnomad	cancer-risk	benign
ALDH18A1	L	418	H	L418H	0.00035	gnomad	benign	non-cancer_pathogenic
ALDH18A1	A	420	S	A420S	4.01E-06	gnomad	benign	benign
ALDH18A1	P	421	L	P421L	4.01E-06	gnomad	cancer-risk	benign
ALDH18A1	P	421	S	P421S	4.00E-06	gnomad	cancer-risk	non-cancer_pathogenic
ALDH18A1	L	422	V	L422V	7.11E-05	gnomad	benign	benign
ALDH18A1	K	424	E	K424E	3.99E-06	gnomad	cancer-risk	benign
ALDH18A1	K	424	Q	K424Q	3.99E-06	gnomad	benign	benign
ALDH18A1	R	425	C	R425C	8.78E-05	gnomad	cancer-risk	non-cancer_pathogenic
ALDH18A1	L	428	F	L428F	3.98E-06	gnomad	cancer-risk	benign
ALDH18A1	K	432	I	K432I	3.98E-06	gnomad	cancer-risk	benign
ALDH18A1	K	432	Q	K432Q	3.98E-06	gnomad	benign	benign
ALDH18A1	L	436	P	L436P	3.98E-06	gnomad	cancer-risk	benign
ALDH18A1	A	437	V	A437V	3.98E-06	gnomad	cancer-risk	benign
ALDH18A1	I	438	V	I438V	3.98E-06	gnomad	cancer-risk	benign
ALDH18A1	A	444	P	A444P	3.98E-06	gnomad	cancer-risk	benign
ALDH18A1	A	444	T	A444T	2.48E-05	gnomad	benign	benign
ALDH18A1	S	446	F	S446F	3.20E-05	gnomad	cancer-risk	benign
ALDH18A1	S	447	C	S447C	3.20E-05	gnomad	cancer-risk	benign
ALDH18A1	S	447	F	S447F	3.98E-06	gnomad	cancer-risk	benign
ALDH18A1	V	451	M	V451M	3.18E-05	gnomad	cancer-risk	non-cancer_pathogenic
ALDH18A1	L	455	V	L455V	3.98E-06	gnomad	cancer-risk	benign
ALDH18A1	R	457	C	R457C	3.98E-06	gnomad	cancer-risk	non-cancer_pathogenic
ALDH18A1	I	460	V	I460V	3.98E-06	gnomad	cancer-risk	benign
ALDH18A1	A	461	D	A461D	3.98E-06	gnomad	cancer-risk	non-cancer_pathogenic
ALDH18A1	N	463	S	N463S	3.98E-06	gnomad	cancer-risk	non-cancer_pathogenic
ALDH18A1	E	465	K	E465K	4.95E-05	gnomad	cancer-risk	benign
ALDH18A1	E	465	V	E465V	7.95E-06	gnomad	cancer-risk	benign
ALDH18A1	Q	468	K	Q468K	3.98E-06	gnomad	benign	benign
ALDH18A1	V	471	I	V471I	3.98E-06	gnomad	benign	benign
ALDH18A1	I	473	V	I473V	3.54E-05	gnomad	benign	benign
ALDH18A1	D	485	G	D485G	1.59E-05	gnomad	cancer-risk	non-cancer_pathogenic
ALDH18A1	C	486	R	C486R	3.98E-06	gnomad	benign	benign
ALDH18A1	C	486	Y	C486Y	7.95E-06	gnomad	benign	non-cancer_pathogenic
ALDH18A1	P	488	L	P488L	3.98E-06	gnomad	cancer-risk	benign
ALDH18A1	A	491	T	A491T	4.21E-06	gnomad	benign	benign
ALDH18A1	A	494	V	A494V	8.37E-06	gnomad	benign	non-cancer_pathogenic
ALDH18A1	I	495	V	I495V	4.17E-06	gnomad	benign	benign
ALDH18A1	A	496	S	A496S	4.17E-06	gnomad	benign	benign
ALDH18A1	A	496	T	A496T	8.35E-06	gnomad	benign	benign
ALDH18A1	S	497	R	S497R	4.16E-06	gnomad	benign	benign
ALDH18A1	G	498	D	G498D	8.33E-06	gnomad	cancer-risk	non-cancer_pathogenic
ALDH18A1	G	498	V	G498V	4.17E-06	gnomad	cancer-risk	non-cancer_pathogenic
ALDH18A1	L	501	S	L501S	4.18E-06	gnomad	cancer-risk	non-cancer_pathogenic
ALDH18A1	L	503	F	L503F	3.18E-05	gnomad	benign	benign
ALDH18A1	A	510	T	A510T	8.73E-06	gnomad	benign	benign
ALDH18A1	N	513	Y	N513Y	3.18E-05	gnomad	cancer-risk	benign
ALDH18A1	R	514	W	R514W	2.73E-05	gnomad	cancer-risk	benign
ALDH18A1	H	517	Q	H517Q	3.36E-05	gnomad	cancer-risk	benign
ALDH18A1	T	520	S	T520S	4.99E-06	gnomad	cancer-risk	benign
ALDH18A1	Q	521	R	Q521R	5.04E-06	gnomad	cancer-risk	non-cancer_pathogenic
ALDH18A1	A	523	V	A523V	0.000174	gnomad	cancer-risk	benign
ALDH18A1	I	526	V	I526V	5.00E-05	gnomad	cancer-risk	benign
ALDH18A1	H	527	L	H527L	1.07E-05	gnomad	cancer-risk	non-cancer_pathogenic
ALDH18A1	H	527	R	H527R	5.34E-06	gnomad	cancer-risk	non-cancer_pathogenic
ALDH18A1	G	528	R	G528R	5.35E-06	gnomad	cancer-risk	non-cancer_pathogenic
ALDH18A1	V	529	D	V529D	5.40E-06	gnomad	cancer-risk	non-cancer_pathogenic
ALDH18A1	K	530	T	K530T	3.81E-05	gnomad	cancer-risk	non-cancer_pathogenic
ALDH18A1	A	532	T	A532T	2.21E-05	gnomad	benign	benign
ALDH18A1	V	533	G	V533G	9.56E-06	gnomad	cancer-risk	non-cancer_pathogenic
ALDH18A1	V	533	M	V533M	1.68E-05	gnomad	cancer-risk	non-cancer_pathogenic
ALDH18A1	L	535	Q	L535Q	0.000137	gnomad	cancer-risk	non-cancer_pathogenic
ALDH18A1	E	540	A	E540A	3.19E-05	gnomad	cancer-risk	non-cancer_pathogenic
ALDH18A1	E	540	D	E540D	3.98E-06	gnomad	cancer-risk	benign
ALDH18A1	V	542	I	V542I	0.000382	gnomad	cancer-risk	benign
ALDH18A1	D	544	G	D544G	1.19E-05	gnomad	benign	non-cancer_pathogenic
ALDH18A1	L	545	F	L545F	3.98E-06	gnomad	cancer-risk	benign
ALDH18A1	C	546	R	C546R	2.48E-05	gnomad	cancer-risk	non-cancer_pathogenic
ALDH18A1	I	552	T	I552T	1.19E-05	gnomad	benign	benign
ALDH18A1	P	557	L	P557L	3.18E-05	gnomad	cancer-risk	non-cancer_pathogenic
ALDH18A1	R	558	H	R558H	7.95E-06	gnomad	cancer-risk	non-cancer_pathogenic
ALDH18A1	Q	562	R	Q562R	3.98E-06	gnomad	cancer-risk	non-cancer_pathogenic
ALDH18A1	L	563	P	L563P	3.98E-06	gnomad	cancer-risk	benign
ALDH18A1	V	564	A	V564A	3.98E-06	gnomad	cancer-risk	benign
ALDH18A1	R	565	G	R565G	1.06E-05	gnomad	cancer-risk	non-cancer_pathogenic
ALDH18A1	Q	568	R	Q568R	2.39E-05	gnomad	cancer-risk	non-cancer_pathogenic
ALDH18A1	A	571	T	A571T	3.18E-05	gnomad	benign	benign
ALDH18A1	I	574	V	I574V	1.99E-05	gnomad	benign	benign
ALDH18A1	H	579	Q	H579Q	3.18E-05	gnomad	cancer-risk	benign
ALDH18A1	H	579	R	H579R	3.98E-06	gnomad	cancer-risk	non-cancer_pathogenic
ALDH18A1	S	580	R	S580R	1.77E-05	gnomad	cancer-risk	benign
ALDH18A1	C	584	R	C584R	3.98E-06	gnomad	benign	non-cancer_pathogenic
ALDH18A1	H	585	Y	H585Y	3.98E-06	gnomad	cancer-risk	benign
ALDH18A1	S	593	G	S593G	3.98E-06	gnomad	cancer-risk	benign
ALDH18A1	K	596	N	K596N	3.98E-06	gnomad	cancer-risk	benign
ALDH18A1	T	598	I	T598I	7.96E-06	gnomad	benign	benign
ALDH18A1	R	599	S	R599S	1.19E-05	gnomad	cancer-risk	non-cancer_pathogenic
ALDH18A1	R	602	T	R602T	3.98E-06	gnomad	cancer-risk	non-cancer_pathogenic
ALDH18A1	S	604	C	S604C	3.98E-06	gnomad	cancer-risk	non-cancer_pathogenic
ALDH18A1	C	612	S	C612S	3.98E-06	gnomad	cancer-risk	benign
ALDH18A1	E	616	K	E616K	3.98E-06	gnomad	cancer-risk	benign
ALDH18A1	R	622	Q	R622Q	2.83E-05	gnomad	benign	non-cancer_pathogenic
ALDH18A1	R	622	W	R622W	7.96E-06	gnomad	cancer-risk	benign
ALDH18A1	D	623	N	D623N	0.000145	gnomad	cancer-risk	non-cancer_pathogenic
ALDH18A1	T	627	A	T627A	3.19E-05	gnomad	benign	benign
ALDH18A1	T	627	I	T627I	3.98E-06	gnomad	benign	benign
ALDH18A1	I	633	N	I633N	7.95E-06	gnomad	cancer-risk	non-cancer_pathogenic
ALDH18A1	I	634	T	I634T	7.95E-06	gnomad	benign	non-cancer_pathogenic
ALDH18A1	M	636	L	M636L	3.98E-06	gnomad	cancer-risk	benign
ALDH18A1	V	639	M	V639M	3.98E-06	gnomad	cancer-risk	non-cancer_pathogenic
ALDH18A1	I	644	N	I644N	3.98E-06	gnomad	cancer-risk	benign
ALDH18A1	I	644	V	I644V	3.98E-06	gnomad	benign	benign
ALDH18A1	P	648	S	P648S	7.95E-06	gnomad	cancer-risk	non-cancer_pathogenic
ALDH18A1	K	649	I	K649I	3.98E-06	gnomad	benign	benign
ALDH18A1	K	649	R	K649R	6.72E-05	gnomad	cancer-risk	benign
ALDH18A1	S	652	C	S652C	3.98E-06	gnomad	benign	benign
ALDH18A1	K	662	R	K662R	3.98E-06	gnomad	benign	benign
ALDH18A1	L	664	P	L664P	3.98E-06	gnomad	benign	benign
ALDH18A1	Y	668	C	Y668C	3.98E-06	gnomad	benign	non-cancer_pathogenic
ALDH18A1	D	670	N	D670N	3.98E-06	gnomad	cancer-risk	non-cancer_pathogenic
ALDH18A1	C	674	S	C674S	3.98E-06	gnomad	cancer-risk	benign
ALDH18A1	V	681	F	V681F	3.98E-06	gnomad	benign	benign
ALDH18A1	V	681	I	V681I	4.38E-05	gnomad	cancer-risk	benign
ALDH18A1	Q	682	E	Q682E	3.98E-06	gnomad	cancer-risk	benign
ALDH18A1	Q	682	R	Q682R	3.98E-06	gnomad	cancer-risk	non-cancer_pathogenic
ALDH18A1	A	684	D	A684D	3.98E-06	gnomad	cancer-risk	non-cancer_pathogenic
ALDH18A1	H	689	R	H689R	3.98E-06	gnomad	cancer-risk	benign
ALDH18A1	S	693	G	S693G	3.98E-06	gnomad	cancer-risk	benign
ALDH18A1	S	693	N	S693N	3.98E-06	gnomad	cancer-risk	benign
ALDH18A1	H	695	Q	H695Q	3.98E-06	gnomad	cancer-risk	benign
ALDH18A1	T	701	A	T701A	3.98E-06	gnomad	benign	benign
ALDH18A1	E	704	K	E704K	1.19E-05	gnomad	cancer-risk	benign
ALDH18A1	N	705	S	N705S	3.98E-06	gnomad	cancer-risk	non-cancer_pathogenic
ALDH18A1	T	706	A	T706A	7.96E-06	gnomad	benign	benign
ALDH18A1	T	706	S	T706S	3.98E-06	gnomad	cancer-risk	benign
ALDH18A1	A	707	G	A707G	3.98E-06	gnomad	cancer-risk	benign
ALDH18A1	A	707	V	A707V	1.19E-05	gnomad	cancer-risk	benign
ALDH18A1	V	714	I	V714I	1.59E-05	gnomad	cancer-risk	benign
ALDH18A1	D	715	H	D715H	1.19E-05	gnomad	benign	non-cancer_pathogenic
ALDH18A1	C	718	G	C718G	3.98E-06	gnomad	cancer-risk	benign
ALDH18A1	C	718	S	C718S	3.98E-05	gnomad	cancer-risk	benign
ALDH18A1	C	718	Y	C718Y	3.98E-06	gnomad	benign	non-cancer_pathogenic
ALDH18A1	W	721	S	W721S	3.98E-06	gnomad	cancer-risk	non-cancer_pathogenic
ALDH18A1	T	725	I	T725I	3.18E-05	gnomad	benign	non-cancer_pathogenic
ALDH18A1	S	728	F	S728F	3.98E-06	gnomad	cancer-risk	benign
ALDH18A1	D	729	V	D729V	1.99E-05	gnomad	cancer-risk	benign
ALDH18A1	R	732	H	R732H	3.98E-06	gnomad	benign	non-cancer_pathogenic
ALDH18A1	G	734	E	G734E	3.98E-06	gnomad	cancer-risk	non-cancer_pathogenic
ALDH18A1	S	742	I	S742I	3.98E-06	gnomad	cancer-risk	non-cancer_pathogenic
ALDH18A1	S	744	L	S744L	7.96E-06	gnomad	cancer-risk	non-cancer_pathogenic
ALDH18A1	S	744	W	S744W	5.18E-05	gnomad	benign	non-cancer_pathogenic
ALDH18A1	R	749	Q	R749Q	1.19E-05	gnomad	cancer-risk	non-cancer_pathogenic
ALDH18A1	G	750	E	G750E	3.98E-06	gnomad	cancer-risk	non-cancer_pathogenic
ALDH18A1	G	753	V	G753V	3.98E-06	gnomad	cancer-risk	non-cancer_pathogenic
ALDH18A1	T	759	I	T759I	3.18E-05	gnomad	benign	non-cancer_pathogenic
ALDH18A1	T	760	A	T760A	1.19E-05	gnomad	benign	benign
ALDH18A1	T	760	I	T760I	3.98E-06	gnomad	benign	benign
ALDH18A1	W	762	R	W762R	3.98E-06	gnomad	benign	benign
ALDH18A1	R	765	Q	R765Q	1.19E-05	gnomad	cancer-risk	non-cancer_pathogenic
ALDH18A1	D	768	E	D768E	7.96E-06	gnomad	cancer-risk	benign
ALDH18A1	V	770	M	V770M	1.77E-05	gnomad	cancer-risk	non-cancer_pathogenic
ALDH18A1	V	771	L	V771L	3.18E-05	gnomad	benign	non-cancer_pathogenic
ALDH18A1	D	773	N	D773N	3.98E-06	gnomad	benign	non-cancer_pathogenic
ALDH18A1	H	777	N	H777N	3.98E-06	gnomad	cancer-risk	benign
ALDH18A1	H	777	R	H777R	3.98E-06	gnomad	cancer-risk	benign
ALDH18A1	S	779	G	S779G	0.000251	gnomad	cancer-risk	benign
ALDH18A1	Y	782	C	Y782C	8.14E-05	gnomad	benign	non-cancer_pathogenic
ALDH18A1	Y	782	S	Y782S	7.96E-06	gnomad	cancer-risk	non-cancer_pathogenic
ALDH18A1	E	785	K	E785K	3.98E-06	gnomad	benign	benign
ALDH18A1	P	790	A	P790A	3.98E-06	gnomad	cancer-risk	benign
ALDH18A1	Q	791	P	Q791P	1.59E-05	gnomad	cancer-risk	non-cancer_pathogenic
ALDH18A1	N	795	D	N795D	2.48E-05	gnomad	benign	non-cancer_pathogenic
ALDH1A1	G	5	S	G5S	3.99E-06	gnomad	benign	benign
ALDH1A1	T	6	K	T6K	3.99E-06	gnomad	cancer-risk	benign
ALDH1A1	L	13	F	L13F	1.20E-05	gnomad	benign	benign
ALDH1A1	T	14	S	T14S	3.99E-06	gnomad	benign	benign
ALDH1A1	D	15	G	D15G	2.48E-05	gnomad	cancer-risk	non-cancer_pathogenic
ALDH1A1	K	17	M	K17M	3.99E-06	gnomad	cancer-risk	non-cancer_pathogenic
ALDH1A1	I	18	S	I18S	3.19E-05	gnomad	cancer-risk	non-cancer_pathogenic
ALDH1A1	Q	19	P	Q19P	3.99E-06	gnomad	cancer-risk	non-cancer_pathogenic
ALDH1A1	Y	20	C	Y20C	3.99E-06	gnomad	benign	non-cancer_pathogenic
ALDH1A1	I	25	V	I25V	4.00E-06	gnomad	cancer-risk	benign
ALDH1A1	E	28	K	E28K	7.19E-05	gnomad	benign	benign
ALDH1A1	H	30	N	H30N	5.32E-05	gnomad	cancer-risk	benign
ALDH1A1	S	34	N	S34N	3.99E-06	gnomad	cancer-risk	benign
ALDH1A1	S	34	T	S34T	1.60E-05	gnomad	cancer-risk	benign
ALDH1A1	K	36	N	K36N	3.19E-05	gnomad	cancer-risk	benign
ALDH1A1	K	37	R	K37R	3.99E-06	gnomad	cancer-risk	benign
ALDH1A1	P	39	T	P39T	1.20E-05	gnomad	benign	non-cancer_pathogenic
ALDH1A1	V	40	I	V40I	1.20E-05	gnomad	benign	benign
ALDH1A1	F	41	V	F41V	3.99E-06	gnomad	cancer-risk	benign
ALDH1A1	E	48	A	E48A	3.99E-06	gnomad	cancer-risk	non-cancer_pathogenic
ALDH1A1	Q	51	H	Q51H	3.99E-05	gnomad	cancer-risk	benign
ALDH1A1	E	53	Q	E53Q	3.99E-06	gnomad	cancer-risk	benign
ALDH1A1	D	56	E	D56E	4.00E-06	gnomad	cancer-risk	benign
ALDH1A1	K	57	E	K57E	1.60E-05	gnomad	benign	benign
ALDH1A1	E	58	K	E58K	2.13E-05	gnomad	benign	benign
ALDH1A1	V	60	A	V60A	7.97E-06	gnomad	cancer-risk	benign
ALDH1A1	A	70	V	A70V	7.96E-06	gnomad	benign	benign
ALDH1A1	F	71	L	F71L	3.98E-06	gnomad	benign	non-cancer_pathogenic
ALDH1A1	F	71	S	F71S	3.18E-05	gnomad	cancer-risk	benign
ALDH1A1	F	71	Y	F71Y	3.98E-06	gnomad	benign	benign
ALDH1A1	Q	72	R	Q72R	3.98E-06	gnomad	cancer-risk	non-cancer_pathogenic
ALDH1A1	I	73	M	I73M	3.18E-05	gnomad	benign	benign
ALDH1A1	P	76	L	P76L	3.98E-06	gnomad	benign	non-cancer_pathogenic
ALDH1A1	P	76	R	P76R	7.08E-06	gnomad	benign	non-cancer_pathogenic
ALDH1A1	R	78	C	R78C	1.99E-05	gnomad	cancer-risk	non-cancer_pathogenic
ALDH1A1	R	78	S	R78S	1.19E-05	gnomad	cancer-risk	non-cancer_pathogenic
ALDH1A1	T	79	A	T79A	3.98E-06	gnomad	benign	non-cancer_pathogenic
ALDH1A1	T	79	S	T79S	7.96E-06	gnomad	benign	non-cancer_pathogenic
ALDH1A1	M	80	T	M80T	3.98E-06	gnomad	benign	non-cancer_pathogenic
ALDH1A1	M	80	V	M80V	3.98E-06	gnomad	benign	non-cancer_pathogenic
ALDH1A1	R	87	Q	R87Q	7.08E-06	gnomad	cancer-risk	benign
ALDH1A1	L	89	F	L89F	3.98E-06	gnomad	benign	non-cancer_pathogenic
ALDH1A1	Y	90	H	Y90H	2.83E-05	gnomad	cancer-risk	benign
ALDH1A1	L	92	M	L92M	3.98E-06	gnomad	cancer-risk	benign
ALDH1A1	L	95	V	L95V	1.19E-05	gnomad	cancer-risk	benign
ALDH1A1	L	101	P	L101P	7.96E-06	gnomad	cancer-risk	non-cancer_pathogenic
ALDH1A1	L	101	V	L101V	3.98E-06	gnomad	cancer-risk	non-cancer_pathogenic
ALDH1A1	L	102	Q	L102Q	3.98E-06	gnomad	cancer-risk	non-cancer_pathogenic
ALDH1A1	L	103	M	L103M	3.98E-06	gnomad	cancer-risk	benign
ALDH1A1	L	103	P	L103P	3.98E-06	gnomad	cancer-risk	non-cancer_pathogenic
ALDH1A1	M	106	T	M106T	6.39E-05	gnomad	benign	non-cancer_pathogenic
ALDH1A1	S	108	T	S108T	7.81E-05	gnomad	benign	benign
ALDH1A1	N	110	D	N110D	3.99E-06	gnomad	benign	benign
ALDH1A1	G	111	D	G111D	3.98E-06	gnomad	benign	non-cancer_pathogenic
ALDH1A1	L	114	F	L114F	3.98E-06	gnomad	benign	benign
ALDH1A1	Y	115	C	Y115C	1.99E-05	gnomad	benign	non-cancer_pathogenic
ALDH1A1	S	116	F	S116F	0.000124	gnomad	cancer-risk	benign
ALDH1A1	N	117	H	N117H	7.08E-06	gnomad	benign	benign
ALDH1A1	N	117	K	N117K	3.18E-05	gnomad	cancer-risk	benign
ALDH1A1	Y	119	F	Y119F	1.19E-05	gnomad	benign	benign
ALDH1A1	G	125	A	G125A	3.98E-06	gnomad	cancer-risk	benign
ALDH1A1	I	127	M	I127M	1.59E-05	gnomad	benign	benign
ALDH1A1	L	130	S	L130S	1.41E-05	gnomad	cancer-risk	benign
ALDH1A1	R	131	S	R131S	7.96E-06	gnomad	cancer-risk	benign
ALDH1A1	C	133	S	C133S	3.98E-06	gnomad	benign	non-cancer_pathogenic
ALDH1A1	A	137	T	A137T	1.59E-05	gnomad	benign	non-cancer_pathogenic
ALDH1A1	D	138	V	D138V	3.98E-06	gnomad	cancer-risk	non-cancer_pathogenic
ALDH1A1	K	139	E	K139E	3.98E-06	gnomad	cancer-risk	benign
ALDH1A1	K	139	N	K139N	7.96E-06	gnomad	cancer-risk	benign
ALDH1A1	Q	141	R	Q141R	7.96E-06	gnomad	cancer-risk	non-cancer_pathogenic
ALDH1A1	R	143	H	R143H	6.37E-05	gnomad	benign	non-cancer_pathogenic
ALDH1A1	T	144	K	T144K	3.19E-05	gnomad	cancer-risk	non-cancer_pathogenic
ALDH1A1	I	147	T	I147T	1.77E-05	gnomad	benign	benign
ALDH1A1	D	148	E	D148E	1.66E-05	gnomad	benign	benign
ALDH1A1	N	150	I	N150I	4.12E-06	gnomad	cancer-risk	non-cancer_pathogenic
ALDH1A1	F	152	L	F152L	0.00118	gnomad	benign	benign
ALDH1A1	Y	154	S	Y154S	3.18E-05	gnomad	cancer-risk	non-cancer_pathogenic
ALDH1A1	H	157	Y	H157Y	1.21E-05	gnomad	benign	benign
ALDH1A1	V	174	I	V174I	4.02E-06	gnomad	benign	benign
ALDH1A1	I	177	F	I177F	0.00308	gnomad	benign	benign
ALDH1A1	I	177	T	I177T	3.90E-05	gnomad	benign	benign
ALDH1A1	I	180	M	I180M	3.60E-05	gnomad	benign	non-cancer_pathogenic
ALDH1A1	I	180	T	I180T	3.99E-06	gnomad	benign	non-cancer_pathogenic
ALDH1A1	P	182	A	P182A	3.99E-06	gnomad	cancer-risk	benign
ALDH1A1	S	185	R	S185R	3.18E-05	gnomad	cancer-risk	non-cancer_pathogenic
ALDH1A1	C	186	S	C186S	3.98E-06	gnomad	benign	benign
ALDH1A1	N	188	S	N188S	3.98E-06	gnomad	benign	non-cancer_pathogenic
ALDH1A1	V	190	A	V190A	1.99E-05	gnomad	benign	benign
ALDH1A1	T	198	I	T198I	3.98E-06	gnomad	cancer-risk	non-cancer_pathogenic
ALDH1A1	A	202	V	A202V	3.98E-06	gnomad	benign	benign
ALDH1A1	V	205	M	V205M	1.19E-05	gnomad	benign	benign
ALDH1A1	A	206	T	A206T	3.98E-06	gnomad	benign	non-cancer_pathogenic
ALDH1A1	L	208	F	L208F	4.01E-06	gnomad	benign	non-cancer_pathogenic
ALDH1A1	I	209	M	I209M	3.18E-05	gnomad	benign	benign
ALDH1A1	I	209	T	I209T	4.01E-06	gnomad	benign	benign
ALDH1A1	P	215	L	P215L	4.17E-06	gnomad	cancer-risk	non-cancer_pathogenic
ALDH1A1	P	216	S	P216S	4.20E-06	gnomad	cancer-risk	non-cancer_pathogenic
ALDH1A1	A	229	G	A229G	1.59E-05	gnomad	cancer-risk	benign
ALDH1A1	A	231	S	A231S	3.18E-05	gnomad	benign	benign
ALDH1A1	I	233	L	I233L	3.19E-05	gnomad	benign	non-cancer_pathogenic
ALDH1A1	D	238	A	D238A	3.59E-05	gnomad	cancer-risk	non-cancer_pathogenic
ALDH1A1	V	242	A	V242A	4.07E-06	gnomad	benign	benign
ALDH1A1	A	243	G	A243G	1.64E-05	gnomad	benign	benign
ALDH1A1	F	244	L	F244L	4.11E-06	gnomad	benign	non-cancer_pathogenic
ALDH1A1	E	249	K	E249K	7.37E-06	gnomad	benign	non-cancer_pathogenic
ALDH1A1	L	253	M	L253M	3.98E-06	gnomad	benign	benign
ALDH1A1	S	261	R	S261R	3.98E-06	gnomad	benign	non-cancer_pathogenic
ALDH1A1	S	261	T	S261T	3.98E-06	gnomad	benign	non-cancer_pathogenic
ALDH1A1	K	264	E	K264E	6.38E-05	gnomad	cancer-risk	non-cancer_pathogenic
ALDH1A1	V	266	M	V266M	3.98E-06	gnomad	benign	non-cancer_pathogenic
ALDH1A1	L	268	M	L268M	3.98E-06	gnomad	benign	benign
ALDH1A1	D	281	N	D281N	3.99E-06	gnomad	cancer-risk	non-cancer_pathogenic
ALDH1A1	A	282	V	A282V	4.01E-06	gnomad	cancer-risk	benign
ALDH1A1	L	284	W	L284W	6.37E-05	gnomad	cancer-risk	non-cancer_pathogenic
ALDH1A1	N	286	S	N286S	7.53E-06	gnomad	cancer-risk	benign
ALDH1A1	V	288	I	V288I	7.50E-06	gnomad	cancer-risk	benign
ALDH1A1	H	293	R	H293R	8.12E-06	gnomad	benign	benign
ALDH1A1	V	295	L	V295L	2.03E-05	gnomad	benign	benign
ALDH1A1	G	300	S	G300S	3.18E-05	gnomad	benign	benign
ALDH1A1	A	306	P	A306P	3.98E-06	gnomad	cancer-risk	non-cancer_pathogenic
ALDH1A1	V	311	G	V311G	3.98E-06	gnomad	cancer-risk	non-cancer_pathogenic
ALDH1A1	E	312	V	E312V	7.96E-06	gnomad	cancer-risk	benign
ALDH1A1	F	319	S	F319S	3.19E-05	gnomad	benign	benign
ALDH1A1	R	326	L	R326L	3.98E-06	gnomad	benign	non-cancer_pathogenic
ALDH1A1	R	326	Q	R326Q	1.99E-05	gnomad	cancer-risk	non-cancer_pathogenic
ALDH1A1	R	326	W	R326W	1.99E-05	gnomad	benign	benign
ALDH1A1	K	328	N	K328N	3.98E-06	gnomad	cancer-risk	benign
ALDH1A1	K	328	T	K328T	7.97E-06	gnomad	cancer-risk	non-cancer_pathogenic
ALDH1A1	K	329	R	K329R	3.98E-06	gnomad	benign	benign
ALDH1A1	I	331	T	I331T	7.97E-06	gnomad	benign	benign
ALDH1A1	P	338	A	P338A	4.02E-06	gnomad	cancer-risk	benign
ALDH1A1	G	339	A	G339A	4.02E-06	gnomad	benign	benign
ALDH1A1	V	340	I	V340I	8.04E-06	gnomad	benign	benign
ALDH1A1	G	343	S	G343S	4.08E-06	gnomad	benign	benign
ALDH1A1	Y	351	H	Y351H	4.00E-06	gnomad	cancer-risk	benign
ALDH1A1	D	352	E	D352E	3.19E-05	gnomad	cancer-risk	benign
ALDH1A1	D	352	G	D352G	1.07E-05	gnomad	benign	non-cancer_pathogenic
ALDH1A1	D	356	N	D356N	3.99E-06	gnomad	cancer-risk	benign
ALDH1A1	L	357	V	L357V	3.99E-06	gnomad	cancer-risk	non-cancer_pathogenic
ALDH1A1	E	359	G	E359G	2.12E-05	gnomad	cancer-risk	non-cancer_pathogenic
ALDH1A1	S	360	N	S360N	3.18E-05	gnomad	cancer-risk	non-cancer_pathogenic
ALDH1A1	K	362	E	K362E	1.19E-05	gnomad	cancer-risk	non-cancer_pathogenic
ALDH1A1	L	368	V	L368V	3.98E-06	gnomad	benign	non-cancer_pathogenic
ALDH1A1	C	370	W	C370W	3.98E-06	gnomad	benign	non-cancer_pathogenic
ALDH1A1	P	374	L	P374L	7.96E-06	gnomad	cancer-risk	benign
ALDH1A1	G	376	R	G376R	3.19E-05	gnomad	cancer-risk	non-cancer_pathogenic
ALDH1A1	K	378	N	K378N	1.19E-05	gnomad	cancer-risk	benign
ALDH1A1	G	379	A	G379A	7.07E-06	gnomad	cancer-risk	benign
ALDH1A1	Q	383	P	Q383P	7.07E-06	gnomad	cancer-risk	non-cancer_pathogenic
ALDH1A1	S	388	A	S388A	3.98E-06	gnomad	benign	benign
ALDH1A1	S	388	C	S388C	3.98E-06	gnomad	benign	non-cancer_pathogenic
ALDH1A1	N	389	D	N389D	3.18E-05	gnomad	benign	benign
ALDH1A1	N	389	H	N389H	3.98E-06	gnomad	benign	non-cancer_pathogenic
ALDH1A1	N	389	S	N389S	1.19E-05	gnomad	benign	non-cancer_pathogenic
ALDH1A1	T	391	A	T391A	7.96E-06	gnomad	cancer-risk	non-cancer_pathogenic
ALDH1A1	E	393	D	E393D	7.96E-06	gnomad	cancer-risk	benign
ALDH1A1	R	395	S	R395S	1.06E-05	gnomad	cancer-risk	non-cancer_pathogenic
ALDH1A1	I	396	V	I396V	3.98E-06	gnomad	cancer-risk	benign
ALDH1A1	A	397	V	A397V	3.98E-06	gnomad	cancer-risk	non-cancer_pathogenic
ALDH1A1	K	398	E	K398E	3.98E-06	gnomad	benign	non-cancer_pathogenic
ALDH1A1	P	404	T	P404T	4.07E-06	gnomad	benign	non-cancer_pathogenic
ALDH1A1	V	405	G	V405G	4.03E-06	gnomad	cancer-risk	non-cancer_pathogenic
ALDH1A1	K	410	R	K410R	4.00E-06	gnomad	cancer-risk	benign
ALDH1A1	K	412	N	K412N	3.99E-06	gnomad	benign	benign
ALDH1A1	K	412	T	K412T	6.38E-05	gnomad	cancer-risk	non-cancer_pathogenic
ALDH1A1	V	417	M	V417M	2.79E-05	gnomad	cancer-risk	non-cancer_pathogenic
ALDH1A1	A	421	G	A421G	1.20E-05	gnomad	benign	benign
ALDH1A1	A	421	S	A421S	3.99E-06	gnomad	benign	benign
ALDH1A1	V	432	M	V432M	3.98E-06	gnomad	benign	non-cancer_pathogenic
ALDH1A1	I	437	L	I437L	3.98E-06	gnomad	benign	benign
ALDH1A1	I	437	T	I437T	7.08E-06	gnomad	benign	benign
ALDH1A1	D	438	V	D438V	7.97E-06	gnomad	benign	benign
ALDH1A1	A	440	V	A440V	3.99E-06	gnomad	cancer-risk	benign
ALDH1A1	I	441	M	I441M	7.97E-06	gnomad	cancer-risk	benign
ALDH1A1	I	441	V	I441V	7.97E-06	gnomad	cancer-risk	benign
ALDH1A1	T	442	I	T442I	3.99E-06	gnomad	benign	benign
ALDH1A1	A	446	T	A446T	0.0004	gnomad	benign	benign
ALDH1A1	A	446	V	A446V	3.99E-06	gnomad	benign	benign
ALDH1A1	V	452	A	V452A	4.03E-06	gnomad	benign	benign
ALDH1A1	V	452	L	V452L	4.03E-06	gnomad	benign	non-cancer_pathogenic
ALDH1A1	V	454	L	V454L	4.03E-06	gnomad	benign	non-cancer_pathogenic
ALDH1A1	V	459	M	V459M	0.000212	gnomad	benign	benign
ALDH1A1	V	460	G	V460G	3.99E-06	gnomad	cancer-risk	non-cancer_pathogenic
ALDH1A1	V	460	I	V460I	1.60E-05	gnomad	benign	non-cancer_pathogenic
ALDH1A1	V	460	L	V460L	3.99E-06	gnomad	benign	benign
ALDH1A1	A	462	V	A462V	7.98E-06	gnomad	benign	benign
ALDH1A1	M	471	I	M471I	3.99E-06	gnomad	benign	non-cancer_pathogenic
ALDH1A1	E	477	Q	E477Q	4.01E-06	gnomad	benign	non-cancer_pathogenic
ALDH1A1	G	479	R	G479R	3.19E-05	gnomad	cancer-risk	non-cancer_pathogenic
ALDH1A1	G	482	S	G482S	4.05E-05	gnomad	cancer-risk	benign
ALDH1A1	V	489	I	V489I	8.07E-06	gnomad	benign	benign
ALDH1A1	T	493	R	T493R	4.03E-06	gnomad	cancer-risk	non-cancer_pathogenic
ALDH1A1	V	494	L	V494L	4.03E-06	gnomad	cancer-risk	benign
ALDH1A1	Q	498	R	Q498R	8.06E-06	gnomad	cancer-risk	non-cancer_pathogenic
ALDH1A2	T	2	I	T2I	1.36E-05	gnomad	benign	non-cancer_pathogenic
ALDH1A2	T	2	N	T2N	4.54E-06	gnomad	benign	non-cancer_pathogenic
ALDH1A2	T	2	S	T2S	3.19E-05	gnomad	benign	benign
ALDH1A2	K	5	R	K5R	4.39E-06	gnomad	benign	non-cancer_pathogenic
ALDH1A2	I	6	M	I6M	4.32E-06	gnomad	benign	non-cancer_pathogenic
ALDH1A2	I	6	T	I6T	1.74E-05	gnomad	benign	non-cancer_pathogenic
ALDH1A2	E	7	D	E7D	3.19E-05	gnomad	benign	non-cancer_pathogenic
ALDH1A2	E	7	Q	E7Q	4.31E-06	gnomad	benign	benign
ALDH1A2	M	8	I	M8I	9.58E-05	gnomad	benign	benign
ALDH1A2	G	10	S	G10S	8.45E-06	gnomad	benign	benign
ALDH1A2	A	14	T	A14T	4.12E-06	gnomad	benign	benign
ALDH1A2	D	15	V	D15V	4.10E-06	gnomad	cancer-risk	non-cancer_pathogenic
ALDH1A2	P	16	R	P16R	4.08E-06	gnomad	benign	non-cancer_pathogenic
ALDH1A2	A	17	D	A17D	4.07E-06	gnomad	cancer-risk	non-cancer_pathogenic
ALDH1A2	A	17	T	A17T	0.000859	gnomad	benign	non-cancer_pathogenic
ALDH1A2	M	20	I	M20I	3.19E-05	gnomad	benign	non-cancer_pathogenic
ALDH1A2	M	20	V	M20V	1.21E-05	gnomad	benign	non-cancer_pathogenic
ALDH1A2	A	21	T	A21T	4.04E-06	gnomad	benign	non-cancer_pathogenic
ALDH1A2	H	24	Q	H24Q	8.05E-06	gnomad	benign	benign
ALDH1A2	H	24	Y	H24Y	7.15E-06	gnomad	benign	non-cancer_pathogenic
ALDH1A2	P	27	L	P27L	1.20E-05	gnomad	cancer-risk	benign
ALDH1A2	P	27	S	P27S	4.02E-06	gnomad	cancer-risk	non-cancer_pathogenic
ALDH1A2	P	29	S	P29S	4.01E-06	gnomad	cancer-risk	non-cancer_pathogenic
ALDH1A2	T	30	K	T30K	5.62E-05	gnomad	cancer-risk	non-cancer_pathogenic
ALDH1A2	T	30	M	T30M	1.20E-05	gnomad	benign	non-cancer_pathogenic
ALDH1A2	N	32	D	N32D	1.43E-05	gnomad	benign	benign
ALDH1A2	K	39	R	K39R	4.01E-06	gnomad	benign	benign
ALDH1A2	I	40	M	I40M	7.08E-06	gnomad	cancer-risk	benign
ALDH1A2	I	40	V	I40V	3.98E-06	gnomad	cancer-risk	benign
ALDH1A2	I	42	M	I42M	3.98E-06	gnomad	cancer-risk	benign
ALDH1A2	E	50	G	E50G	0.000379	gnomad	cancer-risk	non-cancer_pathogenic
ALDH1A2	S	51	G	S51G	7.96E-06	gnomad	cancer-risk	benign
ALDH1A2	R	53	G	R53G	3.98E-06	gnomad	cancer-risk	non-cancer_pathogenic
ALDH1A2	V	54	E	V54E	7.96E-06	gnomad	cancer-risk	benign
ALDH1A2	F	55	L	F55L	3.98E-06	gnomad	benign	benign
ALDH1A2	P	56	A	P56A	3.98E-06	gnomad	cancer-risk	benign
ALDH1A2	P	56	H	P56H	3.98E-06	gnomad	cancer-risk	non-cancer_pathogenic
ALDH1A2	Y	58	C	Y58C	3.18E-05	gnomad	cancer-risk	non-cancer_pathogenic
ALDH1A2	Y	58	H	Y58H	7.96E-06	gnomad	cancer-risk	benign
ALDH1A2	P	60	A	P60A	3.98E-06	gnomad	cancer-risk	non-cancer_pathogenic
ALDH1A2	A	61	S	A61S	3.98E-06	gnomad	benign	benign
ALDH1A2	T	62	S	T62S	1.19E-05	gnomad	benign	benign
ALDH1A2	V	66	L	V66L	3.98E-06	gnomad	benign	benign
ALDH1A2	E	68	K	E68K	3.98E-06	gnomad	benign	benign
ALDH1A2	V	69	L	V69L	1.19E-05	gnomad	cancer-risk	benign
ALDH1A2	D	73	G	D73G	3.98E-06	gnomad	benign	non-cancer_pathogenic
ALDH1A2	A	75	T	A75T	3.99E-06	gnomad	benign	benign
ALDH1A2	I	77	V	I77V	3.99E-06	gnomad	cancer-risk	benign
ALDH1A2	K	79	T	K79T	1.20E-05	gnomad	cancer-risk	non-cancer_pathogenic
ALDH1A2	V	81	A	V81A	3.19E-05	gnomad	cancer-risk	benign
ALDH1A2	L	86	Q	L86Q	3.98E-06	gnomad	cancer-risk	benign
ALDH1A2	L	86	V	L86V	3.98E-06	gnomad	benign	non-cancer_pathogenic
ALDH1A2	A	87	G	A87G	7.97E-06	gnomad	benign	non-cancer_pathogenic
ALDH1A2	S	89	A	S89A	7.08E-06	gnomad	benign	benign
ALDH1A2	S	89	C	S89C	7.08E-06	gnomad	benign	non-cancer_pathogenic
ALDH1A2	R	95	G	R95G	3.98E-06	gnomad	benign	non-cancer_pathogenic
ALDH1A2	E	101	G	E101G	3.19E-05	gnomad	benign	non-cancer_pathogenic
ALDH1A2	R	104	C	R104C	7.96E-06	gnomad	benign	non-cancer_pathogenic
ALDH1A2	D	107	E	D107E	7.96E-06	gnomad	cancer-risk	non-cancer_pathogenic
ALDH1A2	L	109	F	L109F	3.98E-06	gnomad	cancer-risk	non-cancer_pathogenic
ALDH1A2	A	110	V	A110V	3.98E-06	gnomad	cancer-risk	non-cancer_pathogenic
ALDH1A2	D	111	A	D111A	3.98E-06	gnomad	cancer-risk	non-cancer_pathogenic
ALDH1A2	D	111	H	D111H	3.18E-05	gnomad	benign	non-cancer_pathogenic
ALDH1A2	L	112	F	L112F	3.98E-06	gnomad	cancer-risk	non-cancer_pathogenic
ALDH1A2	V	113	L	V113L	7.96E-06	gnomad	cancer-risk	non-cancer_pathogenic
ALDH1A2	R	115	Q	R115Q	7.95E-06	gnomad	benign	non-cancer_pathogenic
ALDH1A2	R	117	S	R117S	7.95E-06	gnomad	cancer-risk	benign
ALDH1A2	A	118	E	A118E	3.58E-05	gnomad	cancer-risk	non-cancer_pathogenic
ALDH1A2	V	119	F	V119F	3.98E-06	gnomad	benign	benign
ALDH1A2	L	120	V	L120V	3.98E-06	gnomad	cancer-risk	non-cancer_pathogenic
ALDH1A2	A	121	G	A121G	1.59E-05	gnomad	benign	non-cancer_pathogenic
ALDH1A2	K	130	N	K130N	3.98E-06	gnomad	cancer-risk	benign
ALDH1A2	L	133	R	L133R	3.98E-06	gnomad	cancer-risk	non-cancer_pathogenic
ALDH1A2	Q	134	E	Q134E	7.96E-06	gnomad	benign	non-cancer_pathogenic
ALDH1A2	A	135	V	A135V	7.96E-06	gnomad	benign	benign
ALDH1A2	Y	137	C	Y137C	3.98E-06	gnomad	benign	non-cancer_pathogenic
ALDH1A2	G	142	A	G142A	3.98E-06	gnomad	cancer-risk	benign
ALDH1A2	I	144	M	I144M	3.19E-05	gnomad	cancer-risk	non-cancer_pathogenic
ALDH1A2	I	144	V	I144V	3.98E-06	gnomad	cancer-risk	benign
ALDH1A2	T	146	I	T146I	3.19E-05	gnomad	benign	non-cancer_pathogenic
ALDH1A2	F	147	L	F147L	3.98E-06	gnomad	benign	benign
ALDH1A2	A	151	S	A151S	0.000733	gnomad	cancer-risk	benign
ALDH1A2	A	151	T	A151T	3.98E-06	gnomad	cancer-risk	benign
ALDH1A2	A	154	T	A154T	1.19E-05	gnomad	cancer-risk	non-cancer_pathogenic
ALDH1A2	T	161	S	T161S	1.06E-05	gnomad	benign	benign
ALDH1A2	D	167	A	D167A	3.98E-06	gnomad	cancer-risk	non-cancer_pathogenic
ALDH1A2	T	170	A	T170A	3.41E-05	gnomad	benign	non-cancer_pathogenic
ALDH1A2	F	171	L	F171L	3.98E-06	gnomad	benign	non-cancer_pathogenic
ALDH1A2	P	176	L	P176L	3.98E-06	gnomad	cancer-risk	non-cancer_pathogenic
ALDH1A2	I	183	V	I183V	3.98E-06	gnomad	benign	benign
ALDH1A2	F	188	C	F188C	3.99E-06	gnomad	benign	non-cancer_pathogenic
ALDH1A2	F	188	L	F188L	3.99E-06	gnomad	benign	non-cancer_pathogenic
ALDH1A2	A	198	V	A198V	3.98E-06	gnomad	benign	non-cancer_pathogenic
ALDH1A2	L	201	M	L201M	3.98E-06	gnomad	benign	benign
ALDH1A2	C	203	F	C203F	3.98E-06	gnomad	benign	benign
ALDH1A2	C	203	Y	C203Y	3.98E-06	gnomad	benign	non-cancer_pathogenic
ALDH1A2	G	204	D	G204D	7.96E-06	gnomad	cancer-risk	non-cancer_pathogenic
ALDH1A2	V	207	E	V207E	3.98E-06	gnomad	cancer-risk	benign
ALDH1A2	E	213	G	E213G	1.99E-05	gnomad	cancer-risk	non-cancer_pathogenic
ALDH1A2	E	213	K	E213K	3.98E-06	gnomad	cancer-risk	benign
ALDH1A2	S	218	I	S218I	3.98E-06	gnomad	benign	non-cancer_pathogenic
ALDH1A2	S	218	T	S218T	3.98E-06	gnomad	benign	benign
ALDH1A2	A	219	V	A219V	3.98E-06	gnomad	cancer-risk	non-cancer_pathogenic
ALDH1A2	M	222	V	M222V	3.98E-05	gnomad	benign	benign
ALDH1A2	A	224	D	A224D	3.98E-06	gnomad	cancer-risk	non-cancer_pathogenic
ALDH1A2	V	235	F	V235F	3.98E-06	gnomad	benign	non-cancer_pathogenic
ALDH1A2	I	236	V	I236V	3.98E-06	gnomad	benign	benign
ALDH1A2	N	237	S	N237S	3.98E-06	gnomad	benign	non-cancer_pathogenic
ALDH1A2	I	238	V	I238V	2.79E-05	gnomad	benign	benign
ALDH1A2	L	239	F	L239F	3.98E-06	gnomad	benign	benign
ALDH1A2	Y	242	H	Y242H	3.98E-06	gnomad	cancer-risk	benign
ALDH1A2	A	249	G	A249G	3.98E-06	gnomad	benign	benign
ALDH1A2	I	250	V	I250V	2.39E-05	gnomad	benign	benign
ALDH1A2	H	253	D	H253D	3.98E-06	gnomad	benign	non-cancer_pathogenic
ALDH1A2	I	254	T	I254T	3.98E-06	gnomad	benign	benign
ALDH1A2	I	254	V	I254V	1.19E-05	gnomad	benign	non-cancer_pathogenic
ALDH1A2	D	257	N	D257N	3.98E-06	gnomad	benign	non-cancer_pathogenic
ALDH1A2	I	259	V	I259V	1.19E-05	gnomad	benign	benign
ALDH1A2	S	264	P	S264P	3.98E-06	gnomad	cancer-risk	non-cancer_pathogenic
ALDH1A2	V	267	I	V267I	3.98E-06	gnomad	benign	benign
ALDH1A2	K	269	E	K269E	3.98E-06	gnomad	cancer-risk	non-cancer_pathogenic
ALDH1A2	E	273	A	E273A	1.06E-05	gnomad	cancer-risk	non-cancer_pathogenic
ALDH1A2	A	275	S	A275S	3.18E-05	gnomad	benign	benign
ALDH1A2	R	277	K	R277K	7.96E-06	gnomad	benign	benign
ALDH1A2	S	278	T	S278T	7.96E-06	gnomad	benign	benign
ALDH1A2	N	279	Y	N279Y	3.98E-06	gnomad	benign	benign
ALDH1A2	N	293	I	N293I	3.98E-06	gnomad	cancer-risk	non-cancer_pathogenic
ALDH1A2	N	293	T	N293T	3.98E-06	gnomad	benign	benign
ALDH1A2	A	299	G	A299G	3.98E-06	gnomad	cancer-risk	benign
ALDH1A2	D	300	E	D300E	7.96E-06	gnomad	cancer-risk	benign
ALDH1A2	L	301	F	L301F	4.00E-06	gnomad	cancer-risk	benign
ALDH1A2	Y	303	H	Y303H	4.00E-06	gnomad	cancer-risk	benign
ALDH1A2	Y	303	S	Y303S	0.000401	gnomad	cancer-risk	benign
ALDH1A2	Q	307	K	Q307K	3.19E-05	gnomad	benign	benign
ALDH1A2	A	308	T	A308T	3.99E-06	gnomad	benign	benign
ALDH1A2	Q	310	H	Q310H	3.99E-06	gnomad	benign	benign
ALDH1A2	G	311	C	G311C	3.99E-06	gnomad	cancer-risk	benign
ALDH1A2	V	312	M	V312M	3.99E-06	gnomad	benign	benign
ALDH1A2	N	315	S	N315S	1.06E-05	gnomad	benign	non-cancer_pathogenic
ALDH1A2	Q	316	K	Q316K	3.99E-06	gnomad	benign	benign
ALDH1A2	Q	318	H	Q318H	3.99E-06	gnomad	benign	non-cancer_pathogenic
ALDH1A2	T	321	A	T321A	3.99E-06	gnomad	benign	non-cancer_pathogenic
ALDH1A2	R	325	G	R325G	3.99E-06	gnomad	benign	non-cancer_pathogenic
ALDH1A2	R	325	L	R325L	3.18E-05	gnomad	benign	non-cancer_pathogenic
ALDH1A2	E	334	K	E334K	3.99E-06	gnomad	cancer-risk	benign
ALDH1A2	F	336	L	F336L	7.97E-06	gnomad	cancer-risk	non-cancer_pathogenic
ALDH1A2	K	345	R	K345R	3.98E-06	gnomad	cancer-risk	benign
ALDH1A2	R	346	W	R346W	1.59E-05	gnomad	benign	non-cancer_pathogenic
ALDH1A2	D	354	E	D354E	7.98E-06	gnomad	benign	non-cancer_pathogenic
ALDH1A2	P	355	S	P355S	3.59E-05	gnomad	cancer-risk	non-cancer_pathogenic
ALDH1A2	T	356	S	T356S	1.42E-05	gnomad	benign	benign
ALDH1A2	P	361	R	P361R	3.99E-06	gnomad	benign	benign
ALDH1A2	P	361	S	P361S	7.10E-06	gnomad	cancer-risk	non-cancer_pathogenic
ALDH1A2	D	364	G	D364G	7.96E-06	gnomad	cancer-risk	non-cancer_pathogenic
ALDH1A2	N	369	K	N369K	2.39E-05	gnomad	cancer-risk	benign
ALDH1A2	E	373	A	E373A	3.98E-06	gnomad	benign	non-cancer_pathogenic
ALDH1A2	E	386	K	E386K	3.98E-06	gnomad	cancer-risk	benign
ALDH1A2	G	391	R	G391R	3.98E-06	gnomad	cancer-risk	non-cancer_pathogenic
ALDH1A2	K	395	M	K395M	3.98E-06	gnomad	benign	benign
ALDH1A2	P	401	S	P401S	7.95E-06	gnomad	cancer-risk	non-cancer_pathogenic
ALDH1A2	S	405	A	S405A	3.98E-06	gnomad	benign	non-cancer_pathogenic
ALDH1A2	S	405	F	S405F	3.19E-05	gnomad	cancer-risk	non-cancer_pathogenic
ALDH1A2	N	406	S	N406S	3.89E-05	gnomad	cancer-risk	non-cancer_pathogenic
ALDH1A2	T	408	S	T408S	3.98E-06	gnomad	cancer-risk	non-cancer_pathogenic
ALDH1A2	D	410	G	D410G	3.98E-06	gnomad	benign	non-cancer_pathogenic
ALDH1A2	D	410	Y	D410Y	3.98E-06	gnomad	cancer-risk	benign
ALDH1A2	M	411	K	M411K	1.19E-05	gnomad	cancer-risk	non-cancer_pathogenic
ALDH1A2	R	412	Q	R412Q	0.00041	gnomad	benign	non-cancer_pathogenic
ALDH1A2	I	418	V	I418V	3.19E-05	gnomad	cancer-risk	benign
ALDH1A2	L	426	F	L426F	7.08E-06	gnomad	cancer-risk	benign
ALDH1A2	R	427	T	R427T	3.98E-06	gnomad	cancer-risk	non-cancer_pathogenic
ALDH1A2	M	431	V	M431V	3.98E-06	gnomad	cancer-risk	benign
ALDH1A2	D	432	G	D432G	7.96E-06	gnomad	benign	non-cancer_pathogenic
ALDH1A2	E	433	D	E433D	3.98E-06	gnomad	cancer-risk	benign
ALDH1A2	I	435	V	I435V	3.98E-06	gnomad	cancer-risk	benign
ALDH1A2	E	436	K	E436K	4.78E-05	gnomad	cancer-risk	benign
ALDH1A2	E	436	Q	E436Q	7.96E-06	gnomad	cancer-risk	benign
ALDH1A2	N	440	K	N440K	3.18E-05	gnomad	cancer-risk	non-cancer_pathogenic
ALDH1A2	D	442	V	D442V	1.59E-05	gnomad	benign	non-cancer_pathogenic
ALDH1A2	V	446	I	V446I	1.19E-05	gnomad	benign	non-cancer_pathogenic
ALDH1A2	I	454	V	I454V	7.96E-06	gnomad	cancer-risk	benign
ALDH1A2	K	456	Q	K456Q	3.98E-06	gnomad	benign	non-cancer_pathogenic
ALDH1A2	A	457	T	A457T	3.98E-06	gnomad	benign	non-cancer_pathogenic
ALDH1A2	A	457	V	A457V	1.77E-05	gnomad	cancer-risk	non-cancer_pathogenic
ALDH1A2	Q	465	K	Q465K	3.98E-06	gnomad	benign	non-cancer_pathogenic
ALDH1A2	V	469	I	V469I	7.96E-06	gnomad	benign	benign
ALDH1A2	N	472	S	N472S	7.99E-06	gnomad	benign	benign
ALDH1A2	Y	474	F	Y474F	7.98E-06	gnomad	benign	benign
ALDH1A2	R	493	I	R493I	3.98E-06	gnomad	cancer-risk	non-cancer_pathogenic
ALDH1A2	F	498	S	F498S	2.81E-05	gnomad	cancer-risk	non-cancer_pathogenic
ALDH1A2	R	501	G	R501G	4.01E-06	gnomad	cancer-risk	non-cancer_pathogenic
ALDH1A2	R	501	Q	R501Q	7.12E-06	gnomad	cancer-risk	benign
ALDH1A2	V	506	I	V506I	4.00E-06	gnomad	benign	benign
ALDH1A2	K	507	N	K507N	3.99E-06	gnomad	cancer-risk	benign
ALDH1A3	T	3	I	T3I	1.31E-05	gnomad	benign	non-cancer_pathogenic
ALDH1A3	T	3	S	T3S	1.31E-05	gnomad	benign	benign
ALDH1A3	G	6	R	G6R	3.24E-05	gnomad	cancer-risk	non-cancer_pathogenic
ALDH1A3	A	7	P	A7P	4.46E-05	gnomad	cancer-risk	benign
ALDH1A3	E	9	G	E9G	2.42E-05	gnomad	cancer-risk	non-cancer_pathogenic
ALDH1A3	E	9	V	E9V	1.76E-05	gnomad	cancer-risk	benign
ALDH1A3	P	13	R	P13R	3.24E-05	gnomad	cancer-risk	non-cancer_pathogenic
ALDH1A3	R	15	G	R15G	0.0047	gnomad	cancer-risk	benign
ALDH1A3	I	24	M	I24M	3.22E-05	gnomad	benign	non-cancer_pathogenic
ALDH1A3	I	24	T	I24T	1.15E-05	gnomad	benign	non-cancer_pathogenic
ALDH1A3	R	25	G	R25G	1.15E-05	gnomad	cancer-risk	non-cancer_pathogenic
ALDH1A3	N	26	H	N26H	3.23E-05	gnomad	benign	non-cancer_pathogenic
ALDH1A3	F	31	Y	F31Y	1.19E-05	gnomad	cancer-risk	benign
ALDH1A3	I	36	V	I36V	7.96E-06	gnomad	cancer-risk	benign
ALDH1A3	H	41	Q	H41Q	0.000322	gnomad	cancer-risk	benign
ALDH1A3	E	42	A	E42A	3.89E-05	gnomad	benign	non-cancer_pathogenic
ALDH1A3	E	42	K	E42K	1.99E-05	gnomad	benign	benign
ALDH1A3	K	44	R	K44R	3.98E-06	gnomad	cancer-risk	benign
ALDH1A3	T	51	A	T51A	3.98E-06	gnomad	cancer-risk	benign
ALDH1A3	C	52	F	C52F	3.98E-06	gnomad	cancer-risk	benign
ALDH1A3	S	55	L	S55L	3.98E-06	gnomad	cancer-risk	non-cancer_pathogenic
ALDH1A3	R	57	Q	R57Q	6.72E-05	gnomad	cancer-risk	non-cancer_pathogenic
ALDH1A3	I	60	M	I60M	3.98E-06	gnomad	benign	benign
ALDH1A3	C	61	S	C61S	3.98E-06	gnomad	cancer-risk	non-cancer_pathogenic
ALDH1A3	E	62	K	E62K	7.07E-06	gnomad	cancer-risk	benign
ALDH1A3	E	62	Q	E62Q	1.59E-05	gnomad	cancer-risk	non-cancer_pathogenic
ALDH1A3	K	73	Q	K73Q	4.10E-06	gnomad	benign	benign
ALDH1A3	A	78	T	A78T	6.37E-05	gnomad	benign	benign
ALDH1A3	R	84	G	R84G	4.03E-06	gnomad	benign	non-cancer_pathogenic
ALDH1A3	G	85	S	G85S	0.000125	gnomad	benign	benign
ALDH1A3	W	88	S	W88S	4.02E-06	gnomad	benign	non-cancer_pathogenic
ALDH1A3	R	89	H	R89H	4.02E-06	gnomad	benign	non-cancer_pathogenic
ALDH1A3	R	90	Q	R90Q	2.14E-05	gnomad	cancer-risk	benign
ALDH1A3	R	90	W	R90W	4.02E-06	gnomad	benign	benign
ALDH1A3	D	92	G	D92G	4.02E-06	gnomad	cancer-risk	non-cancer_pathogenic
ALDH1A3	R	96	C	R96C	4.03E-06	gnomad	benign	non-cancer_pathogenic
ALDH1A3	R	111	C	R111C	4.13E-06	gnomad	cancer-risk	non-cancer_pathogenic
ALDH1A3	A	112	T	A112T	3.75E-05	gnomad	benign	benign
ALDH1A3	T	113	A	T113A	4.19E-06	gnomad	benign	non-cancer_pathogenic
ALDH1A3	T	113	S	T113S	4.18E-06	gnomad	cancer-risk	non-cancer_pathogenic
ALDH1A3	A	115	T	A115T	8.46E-06	gnomad	benign	non-cancer_pathogenic
ALDH1A3	A	116	T	A116T	3.18E-05	gnomad	cancer-risk	benign
ALDH1A3	M	120	V	M120V	4.00E-06	gnomad	cancer-risk	non-cancer_pathogenic
ALDH1A3	D	121	N	D121N	7.12E-06	gnomad	benign	benign
ALDH1A3	F	126	L	F126L	3.20E-05	gnomad	cancer-risk	non-cancer_pathogenic
ALDH1A3	F	131	S	F131S	4.00E-06	gnomad	cancer-risk	benign
ALDH1A3	I	132	V	I132V	2.49E-05	gnomad	benign	benign
ALDH1A3	D	133	E	D133E	4.00E-06	gnomad	benign	non-cancer_pathogenic
ALDH1A3	T	140	S	T140S	3.99E-06	gnomad	benign	benign
ALDH1A3	F	144	Y	F144Y	7.46E-05	gnomad	benign	benign
ALDH1A3	A	145	V	A145V	4.01E-06	gnomad	benign	benign
ALDH1A3	A	148	S	A148S	7.12E-06	gnomad	benign	benign
ALDH1A3	A	148	T	A148T	8.02E-06	gnomad	benign	benign
ALDH1A3	T	155	S	T155S	4.04E-06	gnomad	benign	benign
ALDH1A3	I	156	V	I156V	4.04E-06	gnomad	benign	benign
ALDH1A3	D	159	E	D159E	7.96E-06	gnomad	benign	benign
ALDH1A3	V	163	L	V163L	3.98E-06	gnomad	benign	benign
ALDH1A3	T	166	I	T166I	3.98E-06	gnomad	benign	non-cancer_pathogenic
ALDH1A3	H	168	R	H168R	3.98E-06	gnomad	cancer-risk	benign
ALDH1A3	P	170	A	P170A	7.95E-06	gnomad	cancer-risk	non-cancer_pathogenic
ALDH1A3	I	171	T	I171T	1.19E-05	gnomad	benign	benign
ALDH1A3	G	172	D	G172D	3.98E-06	gnomad	cancer-risk	non-cancer_pathogenic
ALDH1A3	F	182	L	F182L	3.98E-06	gnomad	cancer-risk	non-cancer_pathogenic
ALDH1A3	P	183	S	P183S	3.98E-06	gnomad	cancer-risk	non-cancer_pathogenic
ALDH1A3	G	198	R	G198R	3.98E-06	gnomad	benign	non-cancer_pathogenic
ALDH1A3	T	200	A	T200A	7.95E-06	gnomad	benign	benign
ALDH1A3	Q	208	E	Q208E	3.98E-06	gnomad	cancer-risk	benign
ALDH1A3	L	216	V	L216V	3.98E-06	gnomad	benign	benign
ALDH1A3	G	217	S	G217S	2.48E-05	gnomad	benign	benign
ALDH1A3	S	218	F	S218F	3.98E-06	gnomad	cancer-risk	benign
ALDH1A3	E	222	D	E222D	3.99E-06	gnomad	benign	benign
ALDH1A3	E	222	G	E222G	3.98E-06	gnomad	cancer-risk	non-cancer_pathogenic
ALDH1A3	A	223	S	A223S	4.06E-06	gnomad	benign	benign
ALDH1A3	V	229	A	V229A	4.01E-06	gnomad	benign	benign
ALDH1A3	I	232	V	I232V	4.00E-06	gnomad	benign	benign
ALDH1A3	G	235	A	G235A	4.00E-06	gnomad	cancer-risk	benign
ALDH1A3	F	236	L	F236L	4.00E-06	gnomad	cancer-risk	non-cancer_pathogenic
ALDH1A3	G	237	R	G237R	8.00E-06	gnomad	cancer-risk	non-cancer_pathogenic
ALDH1A3	V	240	A	V240A	1.07E-05	gnomad	cancer-risk	benign
ALDH1A3	K	252	E	K252E	4.04E-06	gnomad	cancer-risk	non-cancer_pathogenic
ALDH1A3	I	253	M	I253M	4.08E-06	gnomad	benign	non-cancer_pathogenic
ALDH1A3	A	254	T	A254T	1.23E-05	gnomad	benign	non-cancer_pathogenic
ALDH1A3	T	256	A	T256A	4.12E-06	gnomad	benign	benign
ALDH1A3	T	256	S	T256S	4.12E-06	gnomad	benign	benign
ALDH1A3	G	257	S	G257S	4.14E-06	gnomad	cancer-risk	benign
ALDH1A3	S	258	T	S258T	4.17E-06	gnomad	cancer-risk	non-cancer_pathogenic
ALDH1A3	L	264	R	L264R	3.98E-06	gnomad	cancer-risk	benign
ALDH1A3	E	267	Q	E267Q	3.98E-06	gnomad	benign	benign
ALDH1A3	A	269	V	A269V	3.98E-06	gnomad	benign	benign
ALDH1A3	R	271	P	R271P	3.98E-06	gnomad	cancer-risk	non-cancer_pathogenic
ALDH1A3	N	273	S	N273S	3.98E-06	gnomad	cancer-risk	non-cancer_pathogenic
ALDH1A3	R	276	G	R276G	7.96E-06	gnomad	cancer-risk	non-cancer_pathogenic
ALDH1A3	R	276	Q	R276Q	2.39E-05	gnomad	cancer-risk	non-cancer_pathogenic
ALDH1A3	G	282	A	G282A	1.99E-05	gnomad	cancer-risk	benign
ALDH1A3	G	282	E	G282E	3.18E-05	gnomad	benign	non-cancer_pathogenic
ALDH1A3	G	282	V	G282V	1.19E-05	gnomad	cancer-risk	non-cancer_pathogenic
ALDH1A3	G	282	W	G282W	7.96E-06	gnomad	cancer-risk	benign
ALDH1A3	G	283	R	G283R	3.98E-06	gnomad	cancer-risk	non-cancer_pathogenic
ALDH1A3	K	284	R	K284R	3.98E-06	gnomad	cancer-risk	benign
ALDH1A3	C	287	G	C287G	3.98E-06	gnomad	cancer-risk	benign
ALDH1A3	I	288	V	I288V	3.98E-06	gnomad	benign	benign
ALDH1A3	V	289	M	V289M	1.19E-05	gnomad	benign	benign
ALDH1A3	A	293	G	A293G	3.18E-05	gnomad	cancer-risk	benign
ALDH1A3	D	296	N	D296N	4.96E-06	gnomad	cancer-risk	non-cancer_pathogenic
ALDH1A3	H	303	Y	H303Y	8.95E-06	gnomad	benign	non-cancer_pathogenic
ALDH1A3	Q	304	R	Q304R	8.76E-06	gnomad	cancer-risk	benign
ALDH1A3	Q	312	R	Q312R	4.11E-06	gnomad	cancer-risk	non-cancer_pathogenic
ALDH1A3	C	314	S	C314S	4.09E-06	gnomad	benign	non-cancer_pathogenic
ALDH1A3	A	316	T	A316T	4.06E-06	gnomad	benign	benign
ALDH1A3	E	323	Q	E323Q	2.00E-05	gnomad	cancer-risk	benign
ALDH1A3	Q	325	E	Q325E	7.09E-06	gnomad	cancer-risk	non-cancer_pathogenic
ALDH1A3	V	335	A	V335A	3.98E-06	gnomad	benign	benign
ALDH1A3	E	336	K	E336K	3.98E-06	gnomad	benign	benign
ALDH1A3	E	336	Q	E336Q	3.98E-06	gnomad	cancer-risk	benign
ALDH1A3	K	339	R	K339R	7.96E-06	gnomad	benign	benign
ALDH1A3	R	341	W	R341W	2.48E-05	gnomad	cancer-risk	non-cancer_pathogenic
ALDH1A3	V	343	M	V343M	1.59E-05	gnomad	benign	non-cancer_pathogenic
ALDH1A3	D	348	Y	D348Y	3.99E-06	gnomad	cancer-risk	benign
ALDH1A3	Q	353	R	Q353R	4.01E-06	gnomad	cancer-risk	non-cancer_pathogenic
ALDH1A3	I	357	T	I357T	3.98E-06	gnomad	cancer-risk	benign
ALDH1A3	F	362	L	F362L	3.98E-06	gnomad	benign	non-cancer_pathogenic
ALDH1A3	I	365	V	I365V	1.19E-05	gnomad	cancer-risk	benign
ALDH1A3	S	371	T	S371T	3.98E-06	gnomad	cancer-risk	non-cancer_pathogenic
ALDH1A3	K	374	T	K374T	3.98E-06	gnomad	cancer-risk	non-cancer_pathogenic
ALDH1A3	K	378	E	K378E	3.98E-06	gnomad	cancer-risk	non-cancer_pathogenic
ALDH1A3	G	383	D	G383D	3.98E-06	gnomad	cancer-risk	non-cancer_pathogenic
ALDH1A3	M	386	T	M386T	1.06E-05	gnomad	benign	non-cancer_pathogenic
ALDH1A3	K	389	N	K389N	4.00E-06	gnomad	cancer-risk	non-cancer_pathogenic
ALDH1A3	K	389	Q	K389Q	4.00E-06	gnomad	benign	non-cancer_pathogenic
ALDH1A3	I	393	V	I393V	4.02E-06	gnomad	benign	benign
ALDH1A3	K	394	Q	K394Q	4.03E-06	gnomad	benign	benign
ALDH1A3	K	409	T	K409T	9.14E-06	gnomad	cancer-risk	non-cancer_pathogenic
ALDH1A3	I	412	L	I412L	4.00E-06	gnomad	benign	non-cancer_pathogenic
ALDH1A3	G	414	A	G414A	3.19E-05	gnomad	benign	benign
ALDH1A3	V	416	M	V416M	3.98E-06	gnomad	benign	non-cancer_pathogenic
ALDH1A3	K	423	E	K423E	3.98E-06	gnomad	benign	benign
ALDH1A3	K	423	R	K423R	1.06E-05	gnomad	cancer-risk	benign
ALDH1A3	S	424	G	S424G	3.98E-06	gnomad	cancer-risk	benign
ALDH1A3	S	424	N	S424N	3.98E-06	gnomad	cancer-risk	benign
ALDH1A3	N	433	S	N433S	3.98E-06	gnomad	benign	non-cancer_pathogenic
ALDH1A3	Y	437	C	Y437C	3.98E-06	gnomad	cancer-risk	non-cancer_pathogenic
ALDH1A3	L	439	P	L439P	3.98E-06	gnomad	benign	non-cancer_pathogenic
ALDH1A3	T	445	K	T445K	3.98E-06	gnomad	benign	non-cancer_pathogenic
ALDH1A3	K	446	R	K446R	1.19E-05	gnomad	benign	benign
ALDH1A3	D	449	E	D449E	3.98E-06	gnomad	cancer-risk	benign
ALDH1A3	K	450	R	K450R	6.36E-05	gnomad	benign	benign
ALDH1A3	K	453	T	K453T	3.54E-05	gnomad	cancer-risk	benign
ALDH1A3	E	459	Q	E459Q	3.98E-06	gnomad	benign	benign
ALDH1A3	S	460	C	S460C	3.98E-06	gnomad	benign	benign
ALDH1A3	T	462	M	T462M	6.73E-05	gnomad	benign	non-cancer_pathogenic
ALDH1A3	A	470	S	A470S	3.98E-06	gnomad	benign	benign
ALDH1A3	L	471	F	L471F	2.78E-05	gnomad	benign	benign
ALDH1A3	G	479	D	G479D	3.98E-06	gnomad	cancer-risk	non-cancer_pathogenic
ALDH1A3	Y	492	C	Y492C	3.98E-06	gnomad	benign	non-cancer_pathogenic
ALDH1A3	A	493	T	A493T	7.96E-06	gnomad	benign	benign
ALDH1A3	L	494	S	L494S	3.98E-06	gnomad	cancer-risk	benign
ALDH1A3	E	496	K	E496K	1.06E-05	gnomad	benign	non-cancer_pathogenic
ALDH1A3	Y	497	N	Y497N	3.98E-06	gnomad	benign	non-cancer_pathogenic
ALDH1A3	T	502	A	T502A	3.98E-06	gnomad	benign	benign
ALDH1A3	I	505	V	I505V	3.98E-06	gnomad	benign	benign
ALDH1A3	D	509	N	D509N	2.79E-05	gnomad	benign	non-cancer_pathogenic
ALDH1A3	P	512	A	P512A	3.98E-06	gnomad	cancer-risk	benign
ALDH1B1	L	2	P	L2P	4.29E-06	gnomad	benign	non-cancer_pathogenic
ALDH1B1	R	3	C	R3C	2.57E-05	gnomad	benign	non-cancer_pathogenic
ALDH1B1	P	7	A	P7A	1.66E-05	gnomad	cancer-risk	benign
ALDH1B1	P	7	H	P7H	8.28E-06	gnomad	benign	non-cancer_pathogenic
ALDH1B1	R	8	W	R8W	2.89E-05	gnomad	benign	benign
ALDH1B1	R	15	G	R15G	3.57E-05	gnomad	benign	non-cancer_pathogenic
ALDH1B1	A	17	S	A17S	4.02E-06	gnomad	benign	benign
ALDH1B1	R	18	G	R18G	4.01E-06	gnomad	benign	non-cancer_pathogenic
ALDH1B1	S	21	L	S21L	1.20E-05	gnomad	cancer-risk	non-cancer_pathogenic
ALDH1B1	A	23	V	A23V	4.00E-06	gnomad	benign	benign
ALDH1B1	P	28	L	P28L	4.00E-06	gnomad	cancer-risk	non-cancer_pathogenic
ALDH1B1	I	29	V	I29V	1.42E-05	gnomad	benign	benign
ALDH1B1	N	31	D	N31D	3.99E-06	gnomad	benign	non-cancer_pathogenic
ALDH1B1	D	33	E	D33E	3.99E-06	gnomad	benign	benign
ALDH1B1	P	35	L	P35L	3.99E-06	gnomad	cancer-risk	benign
ALDH1B1	N	42	S	N42S	3.99E-06	gnomad	benign	benign
ALDH1B1	W	45	R	W45R	1.20E-05	gnomad	cancer-risk	non-cancer_pathogenic
ALDH1B1	D	47	A	D47A	3.98E-06	gnomad	cancer-risk	non-cancer_pathogenic
ALDH1B1	S	50	R	S50R	2.39E-05	gnomad	benign	non-cancer_pathogenic
ALDH1B1	K	51	R	K51R	2.39E-05	gnomad	cancer-risk	benign
ALDH1B1	T	56	A	T56A	3.98E-06	gnomad	benign	benign
ALDH1B1	N	58	K	N58K	3.98E-06	gnomad	cancer-risk	benign
ALDH1B1	P	59	A	P59A	3.19E-05	gnomad	cancer-risk	non-cancer_pathogenic
ALDH1B1	T	61	I	T61I	7.97E-06	gnomad	benign	non-cancer_pathogenic
ALDH1B1	G	62	R	G62R	1.20E-05	gnomad	cancer-risk	non-cancer_pathogenic
ALDH1B1	G	62	W	G62W	0.000128	gnomad	cancer-risk	benign
ALDH1B1	E	63	D	E63D	7.97E-06	gnomad	benign	benign
ALDH1B1	I	65	V	I65V	1.20E-05	gnomad	benign	benign
ALDH1B1	G	66	E	G66E	3.99E-06	gnomad	cancer-risk	non-cancer_pathogenic
ALDH1B1	V	68	L	V68L	3.19E-05	gnomad	cancer-risk	benign
ALDH1B1	A	69	G	A69G	3.99E-06	gnomad	cancer-risk	benign
ALDH1B1	A	69	V	A69V	3.99E-06	gnomad	cancer-risk	benign
ALDH1B1	G	71	S	G71S	3.99E-06	gnomad	cancer-risk	benign
ALDH1B1	R	73	Q	R73Q	4.96E-05	gnomad	cancer-risk	benign
ALDH1B1	R	73	W	R73W	1.06E-05	gnomad	cancer-risk	benign
ALDH1B1	A	74	S	A74S	6.78E-05	gnomad	cancer-risk	benign
ALDH1B1	D	75	E	D75E	3.99E-06	gnomad	cancer-risk	benign
ALDH1B1	V	80	L	V80L	3.99E-06	gnomad	cancer-risk	benign
ALDH1B1	A	82	T	A82T	1.60E-05	gnomad	benign	benign
ALDH1B1	A	86	G	A86G	3.99E-06	gnomad	benign	benign
ALDH1B1	R	88	H	R88H	0.000138	gnomad	benign	non-cancer_pathogenic
ALDH1B1	R	88	P	R88P	3.99E-06	gnomad	benign	non-cancer_pathogenic
ALDH1B1	W	93	R	W93R	7.09E-06	gnomad	cancer-risk	non-cancer_pathogenic
ALDH1B1	R	94	C	R94C	5.19E-05	gnomad	cancer-risk	benign
ALDH1B1	R	94	H	R94H	4.25E-05	gnomad	cancer-risk	non-cancer_pathogenic
ALDH1B1	R	95	W	R95W	1.99E-05	gnomad	benign	benign
ALDH1B1	M	96	K	M96K	7.57E-05	gnomad	cancer-risk	non-cancer_pathogenic
ALDH1B1	G	102	D	G102D	3.98E-06	gnomad	benign	non-cancer_pathogenic
ALDH1B1	N	106	I	N106I	3.98E-06	gnomad	benign	non-cancer_pathogenic
ALDH1B1	R	107	H	R107H	1.99E-05	gnomad	benign	benign
ALDH1B1	D	110	G	D110G	3.98E-06	gnomad	benign	non-cancer_pathogenic
ALDH1B1	D	110	H	D110H	7.96E-06	gnomad	benign	non-cancer_pathogenic
ALDH1B1	L	111	V	L111V	6.37E-05	gnomad	cancer-risk	non-cancer_pathogenic
ALDH1B1	V	112	A	V112A	3.19E-05	gnomad	cancer-risk	non-cancer_pathogenic
ALDH1B1	V	112	L	V112L	3.98E-06	gnomad	cancer-risk	benign
ALDH1B1	R	114	W	R114W	2.79E-05	gnomad	cancer-risk	benign
ALDH1B1	D	115	Y	D115Y	3.19E-05	gnomad	cancer-risk	non-cancer_pathogenic
ALDH1B1	R	116	Q	R116Q	0.000449	gnomad	benign	benign
ALDH1B1	A	120	D	A120D	7.96E-06	gnomad	cancer-risk	benign
ALDH1B1	A	120	V	A120V	3.19E-05	gnomad	cancer-risk	benign
ALDH1B1	S	121	P	S121P	3.98E-06	gnomad	benign	non-cancer_pathogenic
ALDH1B1	L	122	R	L122R	3.98E-06	gnomad	benign	benign
ALDH1B1	D	126	G	D126G	2.39E-05	gnomad	cancer-risk	non-cancer_pathogenic
ALDH1B1	N	127	K	N127K	3.98E-06	gnomad	cancer-risk	benign
ALDH1B1	N	127	S	N127S	7.96E-06	gnomad	cancer-risk	non-cancer_pathogenic
ALDH1B1	P	130	S	P130S	3.98E-06	gnomad	benign	non-cancer_pathogenic
ALDH1B1	E	133	D	E133D	7.96E-06	gnomad	cancer-risk	benign
ALDH1B1	E	133	G	E133G	7.96E-06	gnomad	benign	non-cancer_pathogenic
ALDH1B1	Y	135	H	Y135H	3.98E-06	gnomad	cancer-risk	benign
ALDH1B1	D	140	N	D140N	3.98E-06	gnomad	cancer-risk	benign
ALDH1B1	V	142	F	V142F	3.98E-06	gnomad	benign	benign
ALDH1B1	V	142	I	V142I	3.98E-06	gnomad	cancer-risk	benign
ALDH1B1	I	143	F	I143F	1.19E-05	gnomad	benign	benign
ALDH1B1	I	143	S	I143S	3.19E-05	gnomad	benign	non-cancer_pathogenic
ALDH1B1	K	144	R	K144R	3.98E-06	gnomad	benign	benign
ALDH1B1	V	145	A	V145A	2.83E-05	gnomad	benign	benign
ALDH1B1	V	145	L	V145L	3.98E-06	gnomad	benign	benign
ALDH1B1	Y	148	F	Y148F	3.98E-06	gnomad	benign	benign
ALDH1B1	A	153	P	A153P	3.98E-06	gnomad	cancer-risk	non-cancer_pathogenic
ALDH1B1	D	154	E	D154E	3.98E-06	gnomad	benign	non-cancer_pathogenic
ALDH1B1	W	156	C	W156C	7.96E-06	gnomad	cancer-risk	benign
ALDH1B1	W	156	R	W156R	3.98E-06	gnomad	cancer-risk	benign
ALDH1B1	G	158	D	G158D	3.98E-06	gnomad	cancer-risk	non-cancer_pathogenic
ALDH1B1	G	158	S	G158S	7.96E-06	gnomad	benign	benign
ALDH1B1	T	160	S	T160S	7.96E-06	gnomad	benign	benign
ALDH1B1	I	161	V	I161V	0.000203	gnomad	benign	benign
ALDH1B1	M	163	V	M163V	7.96E-06	gnomad	benign	benign
ALDH1B1	G	165	V	G165V	0.000311	gnomad	cancer-risk	non-cancer_pathogenic
ALDH1B1	Q	166	K	Q166K	1.19E-05	gnomad	benign	non-cancer_pathogenic
ALDH1B1	C	169	Y	C169Y	7.78E-05	gnomad	benign	non-cancer_pathogenic
ALDH1B1	T	171	I	T171I	3.98E-06	gnomad	benign	non-cancer_pathogenic
ALDH1B1	T	171	S	T171S	3.98E-06	gnomad	benign	non-cancer_pathogenic
ALDH1B1	R	172	G	R172G	8.36E-05	gnomad	cancer-risk	non-cancer_pathogenic
ALDH1B1	R	172	Q	R172Q	7.96E-06	gnomad	cancer-risk	non-cancer_pathogenic
ALDH1B1	R	172	W	R172W	7.96E-06	gnomad	cancer-risk	benign
ALDH1B1	H	173	D	H173D	3.98E-06	gnomad	benign	non-cancer_pathogenic
ALDH1B1	H	173	P	H173P	7.96E-06	gnomad	cancer-risk	non-cancer_pathogenic
ALDH1B1	P	175	S	P175S	7.96E-06	gnomad	cancer-risk	non-cancer_pathogenic
ALDH1B1	V	176	F	V176F	3.98E-06	gnomad	benign	benign
ALDH1B1	V	176	I	V176I	0.0132	gnomad	benign	benign
ALDH1B1	P	184	L	P184L	1.99E-05	gnomad	cancer-risk	non-cancer_pathogenic
ALDH1B1	V	190	I	V190I	3.98E-06	gnomad	cancer-risk	benign
ALDH1B1	M	191	I	M191I	2.39E-05	gnomad	cancer-risk	non-cancer_pathogenic
ALDH1B1	M	191	T	M191T	3.58E-05	gnomad	cancer-risk	non-cancer_pathogenic
ALDH1B1	M	191	V	M191V	0.000265	gnomad	cancer-risk	non-cancer_pathogenic
ALDH1B1	A	197	T	A197T	3.98E-06	gnomad	benign	non-cancer_pathogenic
ALDH1B1	P	198	L	P198L	3.54E-05	gnomad	benign	non-cancer_pathogenic
ALDH1B1	T	202	I	T202I	0.000117	gnomad	benign	benign
ALDH1B1	V	206	M	V206M	3.98E-06	gnomad	benign	non-cancer_pathogenic
ALDH1B1	V	207	I	V207I	3.98E-06	gnomad	benign	benign
ALDH1B1	V	210	M	V210M	1.20E-05	gnomad	benign	non-cancer_pathogenic
ALDH1B1	P	215	L	P215L	1.20E-05	gnomad	cancer-risk	non-cancer_pathogenic
ALDH1B1	P	215	S	P215S	0.000315	gnomad	cancer-risk	non-cancer_pathogenic
ALDH1B1	L	216	F	L216F	1.59E-05	gnomad	benign	benign
ALDH1B1	L	216	I	L216I	3.99E-06	gnomad	benign	non-cancer_pathogenic
ALDH1B1	L	216	V	L216V	0.000776	gnomad	benign	non-cancer_pathogenic
ALDH1B1	A	218	G	A218G	1.59E-05	gnomad	benign	non-cancer_pathogenic
ALDH1B1	L	219	V	L219V	3.99E-06	gnomad	benign	non-cancer_pathogenic
ALDH1B1	S	223	A	S223A	3.99E-06	gnomad	benign	benign
ALDH1B1	I	225	V	I225V	3.99E-06	gnomad	benign	benign
ALDH1B1	K	226	R	K226R	3.99E-06	gnomad	benign	benign
ALDH1B1	G	229	S	G229S	3.98E-06	gnomad	benign	non-cancer_pathogenic
ALDH1B1	F	230	C	F230C	3.98E-06	gnomad	benign	non-cancer_pathogenic
ALDH1B1	P	231	H	P231H	3.98E-06	gnomad	cancer-risk	non-cancer_pathogenic
ALDH1B1	P	232	R	P232R	3.99E-06	gnomad	cancer-risk	benign
ALDH1B1	P	232	S	P232S	7.97E-06	gnomad	cancer-risk	non-cancer_pathogenic
ALDH1B1	V	235	M	V235M	2.83E-05	gnomad	benign	non-cancer_pathogenic
ALDH1B1	N	236	K	N236K	7.97E-06	gnomad	cancer-risk	benign
ALDH1B1	T	239	A	T239A	3.99E-06	gnomad	cancer-risk	benign
ALDH1B1	Y	241	H	Y241H	4.96E-05	gnomad	cancer-risk	non-cancer_pathogenic
ALDH1B1	P	243	S	P243S	3.99E-06	gnomad	cancer-risk	non-cancer_pathogenic
ALDH1B1	T	244	I	T244I	1.42E-05	gnomad	cancer-risk	benign
ALDH1B1	A	245	V	A245V	7.98E-06	gnomad	cancer-risk	benign
ALDH1B1	G	246	D	G246D	3.99E-06	gnomad	cancer-risk	non-cancer_pathogenic
ALDH1B1	A	247	V	A247V	1.06E-05	gnomad	cancer-risk	benign
ALDH1B1	I	249	V	I249V	3.99E-06	gnomad	benign	benign
ALDH1B1	Q	251	H	Q251H	3.99E-06	gnomad	benign	benign
ALDH1B1	H	252	L	H252L	3.99E-06	gnomad	benign	non-cancer_pathogenic
ALDH1B1	H	252	Q	H252Q	7.98E-06	gnomad	benign	benign
ALDH1B1	H	252	Y	H252Y	3.99E-06	gnomad	benign	benign
ALDH1B1	V	253	A	V253A	7.98E-06	gnomad	benign	benign
ALDH1B1	D	254	G	D254G	3.99E-06	gnomad	benign	benign
ALDH1B1	V	255	A	V255A	2.40E-05	gnomad	benign	benign
ALDH1B1	V	255	F	V255F	3.99E-06	gnomad	benign	benign
ALDH1B1	D	256	N	D256N	2.40E-05	gnomad	benign	benign
ALDH1B1	A	259	T	A259T	3.19E-05	gnomad	benign	non-cancer_pathogenic
ALDH1B1	A	259	V	A259V	4.00E-06	gnomad	benign	non-cancer_pathogenic
ALDH1B1	T	261	P	T261P	4.00E-06	gnomad	benign	non-cancer_pathogenic
ALDH1B1	G	262	D	G262D	4.00E-06	gnomad	cancer-risk	non-cancer_pathogenic
ALDH1B1	G	262	R	G262R	1.07E-05	gnomad	benign	non-cancer_pathogenic
ALDH1B1	G	262	S	G262S	3.20E-05	gnomad	cancer-risk	benign
ALDH1B1	I	270	M	I270M	1.07E-05	gnomad	benign	non-cancer_pathogenic
ALDH1B1	A	274	V	A274V	4.98E-05	gnomad	benign	benign
ALDH1B1	G	275	S	G275S	1.07E-05	gnomad	cancer-risk	benign
ALDH1B1	D	276	A	D276A	4.01E-06	gnomad	benign	benign
ALDH1B1	N	278	S	N278S	1.20E-05	gnomad	benign	benign
ALDH1B1	R	281	G	R281G	4.00E-06	gnomad	cancer-risk	non-cancer_pathogenic
ALDH1B1	V	282	I	V282I	4.00E-06	gnomad	benign	benign
ALDH1B1	L	284	M	L284M	1.20E-05	gnomad	benign	non-cancer_pathogenic
ALDH1B1	S	290	N	S290N	7.99E-06	gnomad	benign	non-cancer_pathogenic
ALDH1B1	P	291	L	P291L	1.20E-05	gnomad	benign	benign
ALDH1B1	S	292	N	S292N	3.99E-06	gnomad	benign	benign
ALDH1B1	V	294	A	V294A	3.99E-06	gnomad	benign	non-cancer_pathogenic
ALDH1B1	V	294	M	V294M	6.73E-05	gnomad	benign	non-cancer_pathogenic
ALDH1B1	L	295	P	L295P	3.99E-06	gnomad	cancer-risk	non-cancer_pathogenic
ALDH1B1	A	296	P	A296P	4.38E-05	gnomad	benign	non-cancer_pathogenic
ALDH1B1	D	297	N	D297N	1.20E-05	gnomad	cancer-risk	non-cancer_pathogenic
ALDH1B1	D	297	Y	D297Y	3.19E-05	gnomad	benign	non-cancer_pathogenic
ALDH1B1	A	298	V	A298V	3.98E-06	gnomad	cancer-risk	non-cancer_pathogenic
ALDH1B1	D	299	G	D299G	2.83E-05	gnomad	benign	non-cancer_pathogenic
ALDH1B1	D	299	H	D299H	3.98E-06	gnomad	benign	non-cancer_pathogenic
ALDH1B1	M	300	V	M300V	3.98E-06	gnomad	cancer-risk	non-cancer_pathogenic
ALDH1B1	V	304	M	V304M	1.42E-05	gnomad	cancer-risk	non-cancer_pathogenic
ALDH1B1	E	309	G	E309G	3.98E-06	gnomad	cancer-risk	non-cancer_pathogenic
ALDH1B1	A	310	D	A310D	1.19E-05	gnomad	benign	benign
ALDH1B1	M	315	L	M315L	3.98E-06	gnomad	benign	non-cancer_pathogenic
ALDH1B1	M	315	V	M315V	7.07E-06	gnomad	benign	non-cancer_pathogenic
ALDH1B1	G	316	C	G316C	3.98E-06	gnomad	cancer-risk	non-cancer_pathogenic
ALDH1B1	C	318	W	C318W	7.96E-06	gnomad	cancer-risk	non-cancer_pathogenic
ALDH1B1	C	320	Y	C320Y	7.95E-06	gnomad	benign	non-cancer_pathogenic
ALDH1B1	A	321	V	A321V	7.95E-06	gnomad	benign	benign
ALDH1B1	R	324	Q	R324Q	5.30E-05	gnomad	cancer-risk	non-cancer_pathogenic
ALDH1B1	R	324	W	R324W	7.43E-05	gnomad	benign	benign
ALDH1B1	T	325	N	T325N	5.97E-05	gnomad	benign	benign
ALDH1B1	T	325	P	T325P	1.59E-05	gnomad	benign	non-cancer_pathogenic
ALDH1B1	V	327	M	V327M	4.60E-05	gnomad	cancer-risk	non-cancer_pathogenic
ALDH1B1	F	335	L	F335L	3.98E-06	gnomad	cancer-risk	non-cancer_pathogenic
ALDH1B1	E	337	D	E337D	7.96E-06	gnomad	cancer-risk	non-cancer_pathogenic
ALDH1B1	V	340	M	V340M	1.99E-05	gnomad	cancer-risk	benign
ALDH1B1	A	343	G	A343G	6.36E-05	gnomad	benign	benign
ALDH1B1	A	343	T	A343T	1.19E-05	gnomad	benign	benign
ALDH1B1	R	346	G	R346G	3.98E-06	gnomad	cancer-risk	non-cancer_pathogenic
ALDH1B1	K	347	E	K347E	3.98E-06	gnomad	benign	non-cancer_pathogenic
ALDH1B1	V	348	A	V348A	1.59E-05	gnomad	benign	benign
ALDH1B1	V	348	M	V348M	1.59E-05	gnomad	benign	non-cancer_pathogenic
ALDH1B1	N	350	D	N350D	3.98E-06	gnomad	benign	benign
ALDH1B1	P	351	A	P351A	3.98E-06	gnomad	cancer-risk	non-cancer_pathogenic
ALDH1B1	F	352	L	F352L	1.19E-05	gnomad	benign	non-cancer_pathogenic
ALDH1B1	L	354	M	L354M	7.95E-06	gnomad	benign	benign
ALDH1B1	G	359	A	G359A	7.95E-06	gnomad	benign	benign
ALDH1B1	P	360	L	P360L	3.98E-06	gnomad	benign	non-cancer_pathogenic
ALDH1B1	P	360	R	P360R	7.95E-06	gnomad	benign	benign
ALDH1B1	V	362	M	V362M	3.98E-06	gnomad	cancer-risk	non-cancer_pathogenic
ALDH1B1	D	363	E	D363E	7.95E-06	gnomad	cancer-risk	benign
ALDH1B1	D	363	N	D363N	3.98E-06	gnomad	cancer-risk	benign
ALDH1B1	Y	373	C	Y373C	3.98E-06	gnomad	benign	non-cancer_pathogenic
ALDH1B1	G	377	S	G377S	3.98E-06	gnomad	benign	non-cancer_pathogenic
ALDH1B1	G	381	S	G381S	1.99E-05	gnomad	benign	non-cancer_pathogenic
ALDH1B1	R	390	C	R390C	8.84E-05	gnomad	cancer-risk	benign
ALDH1B1	F	391	S	F391S	7.95E-06	gnomad	cancer-risk	benign
ALDH1B1	G	392	R	G392R	1.99E-05	gnomad	cancer-risk	non-cancer_pathogenic
ALDH1B1	E	393	K	E393K	3.98E-06	gnomad	benign	benign
ALDH1B1	G	395	D	G395D	1.41E-05	gnomad	cancer-risk	non-cancer_pathogenic
ALDH1B1	G	395	R	G395R	3.98E-06	gnomad	cancer-risk	non-cancer_pathogenic
ALDH1B1	G	395	V	G395V	3.98E-06	gnomad	cancer-risk	non-cancer_pathogenic
ALDH1B1	F	397	I	F397I	7.07E-06	gnomad	benign	non-cancer_pathogenic
ALDH1B1	K	399	R	K399R	3.98E-06	gnomad	benign	benign
ALDH1B1	P	400	A	P400A	3.98E-06	gnomad	cancer-risk	non-cancer_pathogenic
ALDH1B1	T	401	A	T401A	3.98E-06	gnomad	benign	benign
ALDH1B1	G	404	A	G404A	3.98E-06	gnomad	benign	benign
ALDH1B1	V	406	M	V406M	2.12E-05	gnomad	benign	non-cancer_pathogenic
ALDH1B1	Q	407	K	Q407K	3.98E-06	gnomad	cancer-risk	benign
ALDH1B1	D	408	G	D408G	7.95E-06	gnomad	cancer-risk	non-cancer_pathogenic
ALDH1B1	D	408	N	D408N	3.98E-06	gnomad	cancer-risk	benign
ALDH1B1	I	412	N	I412N	3.98E-06	gnomad	benign	non-cancer_pathogenic
ALDH1B1	K	414	T	K414T	3.98E-06	gnomad	cancer-risk	non-cancer_pathogenic
ALDH1B1	I	417	M	I417M	3.98E-06	gnomad	benign	non-cancer_pathogenic
ALDH1B1	I	417	V	I417V	7.95E-06	gnomad	benign	benign
ALDH1B1	F	418	S	F418S	3.18E-05	gnomad	cancer-risk	non-cancer_pathogenic
ALDH1B1	F	418	Y	F418Y	1.19E-05	gnomad	cancer-risk	benign
ALDH1B1	V	421	M	V421M	4.60E-05	gnomad	benign	non-cancer_pathogenic
ALDH1B1	Q	422	P	Q422P	3.98E-06	gnomad	cancer-risk	benign
ALDH1B1	P	423	A	P423A	3.19E-05	gnomad	cancer-risk	non-cancer_pathogenic
ALDH1B1	P	423	S	P423S	3.98E-06	gnomad	cancer-risk	non-cancer_pathogenic
ALDH1B1	F	427	C	F427C	3.98E-06	gnomad	cancer-risk	non-cancer_pathogenic
ALDH1B1	F	427	L	F427L	1.19E-05	gnomad	cancer-risk	non-cancer_pathogenic
ALDH1B1	K	429	T	K429T	3.98E-06	gnomad	benign	benign
ALDH1B1	V	433	A	V433A	1.59E-05	gnomad	cancer-risk	benign
ALDH1B1	V	434	A	V434A	1.59E-05	gnomad	cancer-risk	non-cancer_pathogenic
ALDH1B1	V	434	F	V434F	4.37E-05	gnomad	benign	benign
ALDH1B1	V	434	I	V434I	3.98E-06	gnomad	cancer-risk	benign
ALDH1B1	E	435	G	E435G	3.19E-05	gnomad	cancer-risk	non-cancer_pathogenic
ALDH1B1	R	436	K	R436K	3.98E-06	gnomad	cancer-risk	benign
ALDH1B1	N	439	S	N439S	1.19E-05	gnomad	benign	non-cancer_pathogenic
ALDH1B1	N	439	T	N439T	3.19E-05	gnomad	benign	benign
ALDH1B1	R	441	W	R441W	1.06E-05	gnomad	benign	benign
ALDH1B1	Y	442	C	Y442C	3.98E-06	gnomad	cancer-risk	non-cancer_pathogenic
ALDH1B1	G	443	V	G443V	3.98E-06	gnomad	benign	benign
ALDH1B1	V	448	A	V448A	1.59E-05	gnomad	benign	non-cancer_pathogenic
ALDH1B1	T	450	A	T450A	3.19E-05	gnomad	cancer-risk	non-cancer_pathogenic
ALDH1B1	R	451	Q	R451Q	6.36E-05	gnomad	benign	benign
ALDH1B1	D	452	G	D452G	3.98E-06	gnomad	benign	non-cancer_pathogenic
ALDH1B1	D	452	H	D452H	1.59E-05	gnomad	benign	non-cancer_pathogenic
ALDH1B1	D	452	N	D452N	1.41E-05	gnomad	cancer-risk	non-cancer_pathogenic
ALDH1B1	D	454	N	D454N	3.98E-06	gnomad	cancer-risk	benign
ALDH1B1	K	455	R	K455R	1.99E-05	gnomad	benign	benign
ALDH1B1	M	457	L	M457L	1.19E-05	gnomad	cancer-risk	non-cancer_pathogenic
ALDH1B1	M	457	T	M457T	1.19E-05	gnomad	benign	non-cancer_pathogenic
ALDH1B1	L	463	P	L463P	7.96E-06	gnomad	benign	non-cancer_pathogenic
ALDH1B1	G	466	A	G466A	3.98E-06	gnomad	cancer-risk	benign
ALDH1B1	V	468	E	V468E	3.98E-06	gnomad	benign	non-cancer_pathogenic
ALDH1B1	V	470	A	V470A	0.00461	gnomad	benign	non-cancer_pathogenic
ALDH1B1	T	472	I	T472I	1.41E-05	gnomad	benign	non-cancer_pathogenic
ALDH1B1	N	474	D	N474D	2.78E-05	gnomad	cancer-risk	benign
ALDH1B1	N	474	S	N474S	3.98E-06	gnomad	cancer-risk	non-cancer_pathogenic
ALDH1B1	V	476	I	V476I	3.98E-05	gnomad	cancer-risk	non-cancer_pathogenic
ALDH1B1	P	481	L	P481L	1.19E-05	gnomad	cancer-risk	benign
ALDH1B1	P	481	T	P481T	7.95E-06	gnomad	cancer-risk	non-cancer_pathogenic
ALDH1B1	F	482	V	F482V	3.98E-06	gnomad	cancer-risk	non-cancer_pathogenic
ALDH1B1	G	483	A	G483A	3.98E-06	gnomad	benign	non-cancer_pathogenic
ALDH1B1	G	484	R	G484R	7.95E-06	gnomad	cancer-risk	non-cancer_pathogenic
ALDH1B1	S	488	P	S488P	3.98E-06	gnomad	benign	non-cancer_pathogenic
ALDH1B1	R	492	K	R492K	3.98E-06	gnomad	benign	benign
ALDH1B1	E	493	K	E493K	7.95E-06	gnomad	cancer-risk	benign
ALDH1B1	E	493	V	E493V	3.98E-06	gnomad	cancer-risk	non-cancer_pathogenic
ALDH1B1	G	495	S	G495S	3.98E-06	gnomad	cancer-risk	benign
ALDH1B1	A	501	T	A501T	3.98E-06	gnomad	cancer-risk	benign
ALDH1B1	Y	502	F	Y502F	3.98E-06	gnomad	benign	benign
ALDH1B1	T	503	A	T503A	3.98E-06	gnomad	benign	benign
ALDH1B1	T	503	I	T503I	3.98E-06	gnomad	benign	benign
ALDH1B1	E	504	G	E504G	3.19E-05	gnomad	cancer-risk	non-cancer_pathogenic
ALDH1B1	I	510	V	I510V	1.07E-05	gnomad	benign	benign
ALDH1B1	K	511	R	K511R	1.60E-05	gnomad	benign	benign
ALDH1B1	V	512	A	V512A	4.01E-06	gnomad	benign	benign
ALDH1B1	S	517	A	S517A	4.06E-06	gnomad	benign	benign
ALDH1L1	K	48	N	K48N	3.98E-06	gnomad	cancer-risk	benign
ALDH1L1	A	71	G	A71G	3.98E-06	gnomad	benign	benign
ALDH1L1	A	71	V	A71V	3.19E-05	gnomad	benign	non-cancer_pathogenic
ALDH1L1	Q	74	R	Q74R	3.98E-06	gnomad	cancer-risk	benign
ALDH1L1	A	75	T	A75T	3.98E-06	gnomad	benign	benign
ALDH1L1	G	131	R	G131R	4.06E-06	gnomad	benign	non-cancer_pathogenic
ALDH1L1	I	134	T	I134T	4.00E-06	gnomad	benign	non-cancer_pathogenic
ALDH1L1	G	140	D	G140D	4.14E-06	gnomad	cancer-risk	non-cancer_pathogenic
ALDH1L1	I	183	M	I183M	7.21E-05	gnomad	benign	non-cancer_pathogenic
ALDH1L1	I	183	V	I183V	4.00E-06	gnomad	benign	benign
ALDH1L1	A	198	D	A198D	4.00E-06	gnomad	cancer-risk	benign
ALDH1L1	A	198	T	A198T	8.00E-06	gnomad	cancer-risk	benign
ALDH1L1	N	222	S	N222S	3.98E-06	gnomad	cancer-risk	non-cancer_pathogenic
ALDH1L1	A	319	S	A319S	6.39E-06	gnomad	cancer-risk	benign
ALDH1L1	S	354	F	S354F	0.00028	gnomad	cancer-risk	benign
ALDH1L1	E	372	A	E372A	7.96E-06	gnomad	cancer-risk	non-cancer_pathogenic
ALDH1L1	E	410	D	E410D	3.98E-06	gnomad	cancer-risk	non-cancer_pathogenic
ALDH1L1	K	479	N	K479N	4.22E-06	gnomad	cancer-risk	benign
ALDH1L1	A	504	V	A504V	4.04E-06	gnomad	cancer-risk	non-cancer_pathogenic
ALDH1L1	A	599	G	A599G	4.14E-06	gnomad	benign	non-cancer_pathogenic
ALDH1L1	V	633	L	V633L	4.01E-06	gnomad	benign	non-cancer_pathogenic
ALDH1L1	V	643	I	V643I	1.20E-05	gnomad	cancer-risk	benign
ALDH1L1	S	661	P	S661P	3.19E-05	gnomad	cancer-risk	non-cancer_pathogenic
ALDH1L1	V	766	A	V766A	3.19E-05	gnomad	benign	non-cancer_pathogenic
ALDH1L1	V	766	M	V766M	6.36E-05	gnomad	benign	non-cancer_pathogenic
ALDH1L1	K	767	N	K767N	7.07E-06	gnomad	cancer-risk	benign
ALDH1L1	T	840	M	T840M	1.59E-05	gnomad	cancer-risk	non-cancer_pathogenic
ALDH1L1	T	840	S	T840S	1.19E-05	gnomad	cancer-risk	benign
ALDH1L2	G	5	S	G5S	2.20E-05	gnomad	cancer-risk	benign
ALDH1L2	R	11	P	R11P	6.56E-05	gnomad	benign	non-cancer_pathogenic
ALDH1L2	R	16	Q	R16Q	3.90E-05	gnomad	cancer-risk	benign
ALDH1L2	V	17	F	V17F	3.98E-06	gnomad	benign	benign
ALDH1L2	K	20	T	K20T	3.98E-06	gnomad	cancer-risk	non-cancer_pathogenic
ALDH1L2	A	26	S	A26S	3.98E-05	gnomad	cancer-risk	benign
ALDH1L2	S	31	G	S31G	3.98E-06	gnomad	benign	benign
ALDH1L2	F	33	S	F33S	3.98E-06	gnomad	cancer-risk	non-cancer_pathogenic
ALDH1L2	Q	35	E	Q35E	3.98E-06	gnomad	cancer-risk	non-cancer_pathogenic
ALDH1L2	Q	35	K	Q35K	3.98E-06	gnomad	cancer-risk	non-cancer_pathogenic
ALDH1L2	Q	35	R	Q35R	3.98E-06	gnomad	cancer-risk	non-cancer_pathogenic
ALDH1L2	E	36	D	E36D	1.19E-05	gnomad	benign	benign
ALDH1L2	S	39	N	S39N	2.78E-05	gnomad	benign	benign
ALDH1L2	R	42	C	R42C	0.000265	gnomad	cancer-risk	benign
ALDH1L2	E	44	Q	E44Q	3.18E-05	gnomad	benign	benign
ALDH1L2	G	45	V	G45V	3.89E-05	gnomad	cancer-risk	non-cancer_pathogenic
ALDH1L2	V	48	I	V48I	1.06E-05	gnomad	benign	benign
ALDH1L2	G	50	R	G50R	7.95E-06	gnomad	benign	non-cancer_pathogenic
ALDH1L2	F	52	S	F52S	2.12E-05	gnomad	cancer-risk	benign
ALDH1L2	T	53	I	T53I	1.06E-05	gnomad	benign	non-cancer_pathogenic
ALDH1L2	T	53	P	T53P	7.95E-06	gnomad	benign	non-cancer_pathogenic
ALDH1L2	G	59	R	G59R	3.98E-06	gnomad	cancer-risk	non-cancer_pathogenic
ALDH1L2	A	67	D	A67D	4.06E-06	gnomad	benign	benign
ALDH1L2	A	67	V	A67V	4.68E-05	gnomad	cancer-risk	benign
ALDH1L2	K	70	T	K70T	4.03E-06	gnomad	cancer-risk	non-cancer_pathogenic
ALDH1L2	D	71	G	D71G	4.01E-06	gnomad	cancer-risk	non-cancer_pathogenic
ALDH1L2	D	71	N	D71N	4.02E-06	gnomad	benign	non-cancer_pathogenic
ALDH1L2	P	74	L	P74L	3.98E-06	gnomad	benign	non-cancer_pathogenic
ALDH1L2	V	75	A	V75A	0.000127	gnomad	cancer-risk	benign
ALDH1L2	K	77	N	K77N	3.19E-05	gnomad	cancer-risk	benign
ALDH1L2	G	85	D	G85D	1.06E-05	gnomad	cancer-risk	non-cancer_pathogenic
ALDH1L2	K	86	T	K86T	3.98E-06	gnomad	benign	non-cancer_pathogenic
ALDH1L2	T	87	A	T87A	0.000223	gnomad	benign	benign
ALDH1L2	I	88	V	I88V	1.41E-05	gnomad	cancer-risk	benign
ALDH1L2	K	89	E	K89E	3.98E-06	gnomad	cancer-risk	benign
ALDH1L2	V	91	L	V91L	7.95E-06	gnomad	cancer-risk	non-cancer_pathogenic
ALDH1L2	A	92	E	A92E	1.19E-05	gnomad	benign	non-cancer_pathogenic
ALDH1L2	E	93	G	E93G	3.58E-05	gnomad	cancer-risk	non-cancer_pathogenic
ALDH1L2	A	94	G	A94G	1.19E-05	gnomad	cancer-risk	benign
ALDH1L2	R	96	T	R96T	1.41E-05	gnomad	cancer-risk	benign
ALDH1L2	S	97	T	S97T	3.98E-06	gnomad	cancer-risk	benign
ALDH1L2	A	100	S	A100S	3.98E-06	gnomad	benign	benign
ALDH1L2	A	100	V	A100V	7.95E-06	gnomad	benign	benign
ALDH1L2	L	102	Q	L102Q	3.98E-06	gnomad	cancer-risk	non-cancer_pathogenic
ALDH1L2	F	111	S	F111S	3.98E-06	gnomad	cancer-risk	non-cancer_pathogenic
ALDH1L2	P	113	A	P113A	0.000258	gnomad	cancer-risk	non-cancer_pathogenic
ALDH1L2	I	117	T	I117T	0.000145	gnomad	cancer-risk	benign
ALDH1L2	K	121	M	K121M	3.19E-05	gnomad	benign	non-cancer_pathogenic
ALDH1L2	K	121	N	K121N	3.19E-05	gnomad	cancer-risk	benign
ALDH1L2	S	130	C	S130C	3.98E-06	gnomad	benign	non-cancer_pathogenic
ALDH1L2	S	130	F	S130F	3.98E-06	gnomad	cancer-risk	benign
ALDH1L2	S	130	P	S130P	3.98E-06	gnomad	cancer-risk	non-cancer_pathogenic
ALDH1L2	L	132	P	L132P	3.20E-05	gnomad	cancer-risk	non-cancer_pathogenic
ALDH1L2	R	136	S	R136S	1.20E-05	gnomad	benign	non-cancer_pathogenic
ALDH1L2	A	138	V	A138V	4.02E-06	gnomad	benign	benign
ALDH1L2	A	140	V	A140V	4.05E-06	gnomad	benign	benign
ALDH1L2	I	141	N	I141N	4.11E-06	gnomad	benign	non-cancer_pathogenic
ALDH1L2	T	144	A	T144A	4.90E-06	gnomad	benign	benign
ALDH1L2	I	146	V	I146V	3.18E-05	gnomad	benign	benign
ALDH1L2	M	147	K	M147K	1.84E-05	gnomad	benign	benign
ALDH1L2	M	147	T	M147T	4.60E-06	gnomad	benign	non-cancer_pathogenic
ALDH1L2	A	152	T	A152T	4.51E-06	gnomad	cancer-risk	benign
ALDH1L2	G	153	R	G153R	4.48E-06	gnomad	cancer-risk	non-cancer_pathogenic
ALDH1L2	D	160	N	D160N	1.65E-05	gnomad	cancer-risk	non-cancer_pathogenic
ALDH1L2	G	166	E	G166E	4.03E-06	gnomad	cancer-risk	non-cancer_pathogenic
ALDH1L2	R	172	T	R172T	4.03E-06	gnomad	cancer-risk	non-cancer_pathogenic
ALDH1L2	S	173	A	S173A	7.16E-06	gnomad	benign	benign
ALDH1L2	V	176	A	V176A	4.03E-06	gnomad	cancer-risk	benign
ALDH1L2	N	179	S	N179S	1.44E-05	gnomad	cancer-risk	benign
ALDH1L2	T	181	I	T181I	8.14E-06	gnomad	benign	non-cancer_pathogenic
ALDH1L2	A	184	E	A184E	4.20E-06	gnomad	cancer-risk	non-cancer_pathogenic
ALDH1L2	R	188	Q	R188Q	0.000138	gnomad	cancer-risk	non-cancer_pathogenic
ALDH1L2	R	188	W	R188W	4.44E-06	gnomad	benign	non-cancer_pathogenic
ALDH1L2	F	191	S	F191S	4.58E-06	gnomad	cancer-risk	non-cancer_pathogenic
ALDH1L2	M	198	T	M198T	0.000247	gnomad	benign	benign
ALDH1L2	E	200	A	E200A	5.31E-05	gnomad	cancer-risk	non-cancer_pathogenic
ALDH1L2	E	200	D	E200D	3.98E-06	gnomad	cancer-risk	benign
ALDH1L2	L	204	F	L204F	0.000654	gnomad	benign	benign
ALDH1L2	I	205	M	I205M	3.98E-06	gnomad	benign	non-cancer_pathogenic
ALDH1L2	I	205	V	I205V	1.06E-05	gnomad	benign	benign
ALDH1L2	A	206	V	A206V	1.99E-05	gnomad	benign	benign
ALDH1L2	G	208	R	G208R	3.98E-06	gnomad	benign	non-cancer_pathogenic
ALDH1L2	R	212	H	R212H	2.83E-05	gnomad	benign	non-cancer_pathogenic
ALDH1L2	I	213	L	I213L	3.98E-06	gnomad	benign	benign
ALDH1L2	P	214	S	P214S	4.95E-05	gnomad	cancer-risk	non-cancer_pathogenic
ALDH1L2	P	214	T	P214T	3.98E-06	gnomad	cancer-risk	non-cancer_pathogenic
ALDH1L2	E	218	D	E218D	3.98E-06	gnomad	benign	benign
ALDH1L2	E	218	Q	E218Q	7.95E-06	gnomad	benign	benign
ALDH1L2	A	220	S	A220S	3.98E-06	gnomad	cancer-risk	benign
ALDH1L2	G	224	V	G224V	3.98E-06	gnomad	cancer-risk	benign
ALDH1L2	K	227	E	K227E	3.18E-05	gnomad	cancer-risk	non-cancer_pathogenic
ALDH1L2	K	228	T	K228T	3.98E-06	gnomad	cancer-risk	non-cancer_pathogenic
ALDH1L2	I	233	V	I233V	3.98E-06	gnomad	cancer-risk	benign
ALDH1L2	S	234	T	S234T	7.96E-06	gnomad	cancer-risk	benign
ALDH1L2	R	247	Q	R247Q	1.59E-05	gnomad	cancer-risk	non-cancer_pathogenic
ALDH1L2	T	257	A	T257A	7.96E-06	gnomad	benign	benign
ALDH1L2	T	257	I	T257I	7.96E-06	gnomad	benign	non-cancer_pathogenic
ALDH1L2	M	263	T	M263T	4.01E-06	gnomad	cancer-risk	non-cancer_pathogenic
ALDH1L2	Y	267	H	Y267H	4.01E-06	gnomad	benign	non-cancer_pathogenic
ALDH1L2	S	269	L	S269L	7.98E-06	gnomad	cancer-risk	benign
ALDH1L2	N	273	H	N273H	2.83E-05	gnomad	benign	non-cancer_pathogenic
ALDH1L2	P	278	L	P278L	0.00011	gnomad	benign	non-cancer_pathogenic
ALDH1L2	P	281	S	P281S	0.000143	gnomad	cancer-risk	non-cancer_pathogenic
ALDH1L2	L	282	M	L282M	1.19E-05	gnomad	benign	benign
ALDH1L2	G	286	D	G286D	2.48E-05	gnomad	cancer-risk	non-cancer_pathogenic
ALDH1L2	A	287	D	A287D	3.98E-06	gnomad	cancer-risk	non-cancer_pathogenic
ALDH1L2	K	288	R	K288R	1.19E-05	gnomad	benign	benign
ALDH1L2	P	290	L	P290L	3.98E-06	gnomad	cancer-risk	non-cancer_pathogenic
ALDH1L2	V	293	I	V293I	0.000223	gnomad	benign	benign
ALDH1L2	T	294	A	T294A	2.12E-05	gnomad	benign	benign
ALDH1L2	K	295	T	K295T	3.98E-06	gnomad	benign	non-cancer_pathogenic
ALDH1L2	G	297	R	G297R	3.99E-06	gnomad	benign	non-cancer_pathogenic
ALDH1L2	V	299	D	V299D	4.00E-06	gnomad	benign	non-cancer_pathogenic
ALDH1L2	F	301	S	F301S	2.43E-05	gnomad	cancer-risk	benign
ALDH1L2	T	309	A	T309A	7.07E-06	gnomad	benign	non-cancer_pathogenic
ALDH1L2	F	315	L	F315L	1.59E-05	gnomad	benign	non-cancer_pathogenic
ALDH1L2	D	317	G	D317G	3.98E-06	gnomad	cancer-risk	non-cancer_pathogenic
ALDH1L2	F	327	L	F327L	3.98E-06	gnomad	benign	non-cancer_pathogenic
ALDH1L2	E	331	K	E331K	3.98E-06	gnomad	cancer-risk	benign
ALDH1L2	T	332	R	T332R	3.98E-06	gnomad	cancer-risk	benign
ALDH1L2	S	333	T	S333T	3.98E-06	gnomad	cancer-risk	benign
ALDH1L2	V	334	L	V334L	1.99E-05	gnomad	cancer-risk	non-cancer_pathogenic
ALDH1L2	E	336	Q	E336Q	3.98E-06	gnomad	cancer-risk	benign
ALDH1L2	T	338	I	T338I	3.98E-06	gnomad	benign	non-cancer_pathogenic
ALDH1L2	V	342	M	V342M	3.98E-06	gnomad	cancer-risk	non-cancer_pathogenic
ALDH1L2	T	347	N	T347N	7.96E-06	gnomad	benign	benign
ALDH1L2	T	347	S	T347S	3.18E-05	gnomad	cancer-risk	benign
ALDH1L2	I	348	M	I348M	3.98E-06	gnomad	cancer-risk	benign
ALDH1L2	K	349	T	K349T	3.98E-06	gnomad	cancer-risk	non-cancer_pathogenic
ALDH1L2	A	353	D	A353D	3.19E-05	gnomad	benign	benign
ALDH1L2	G	354	A	G354A	7.96E-06	gnomad	cancer-risk	benign
ALDH1L2	S	357	N	S357N	3.98E-06	gnomad	benign	non-cancer_pathogenic
ALDH1L2	V	359	I	V359I	1.59E-05	gnomad	benign	benign
ALDH1L2	V	359	L	V359L	3.98E-06	gnomad	benign	benign
ALDH1L2	I	362	T	I362T	1.41E-05	gnomad	benign	benign
ALDH1L2	T	366	A	T366A	3.98E-06	gnomad	cancer-risk	benign
ALDH1L2	T	366	I	T366I	3.98E-06	gnomad	cancer-risk	benign
ALDH1L2	T	366	P	T366P	3.98E-06	gnomad	benign	non-cancer_pathogenic
ALDH1L2	D	367	V	D367V	0.000171	gnomad	benign	non-cancer_pathogenic
ALDH1L2	M	376	R	M376R	3.98E-06	gnomad	cancer-risk	non-cancer_pathogenic
ALDH1L2	D	377	H	D377H	7.07E-06	gnomad	benign	benign
ALDH1L2	V	378	A	V378A	3.98E-06	gnomad	cancer-risk	non-cancer_pathogenic
ALDH1L2	L	381	V	L381V	1.72E-05	gnomad	cancer-risk	non-cancer_pathogenic
ALDH1L2	V	382	D	V382D	4.12E-06	gnomad	cancer-risk	non-cancer_pathogenic
ALDH1L2	V	382	I	V382I	0.00164	gnomad	cancer-risk	benign
ALDH1L2	G	391	E	G391E	1.08E-05	gnomad	cancer-risk	non-cancer_pathogenic
ALDH1L2	G	391	V	G391V	4.05E-06	gnomad	cancer-risk	non-cancer_pathogenic
ALDH1L2	Q	395	K	Q395K	4.04E-06	gnomad	cancer-risk	non-cancer_pathogenic
ALDH1L2	Y	400	C	Y400C	3.99E-06	gnomad	benign	non-cancer_pathogenic
ALDH1L2	M	401	T	M401T	7.98E-06	gnomad	benign	non-cancer_pathogenic
ALDH1L2	G	407	D	G407D	4.25E-05	gnomad	benign	benign
ALDH1L2	G	407	S	G407S	7.97E-06	gnomad	cancer-risk	non-cancer_pathogenic
ALDH1L2	K	411	N	K411N	1.06E-05	gnomad	cancer-risk	non-cancer_pathogenic
ALDH1L2	V	412	F	V412F	3.99E-06	gnomad	cancer-risk	benign
ALDH1L2	V	412	I	V412I	7.98E-06	gnomad	cancer-risk	non-cancer_pathogenic
ALDH1L2	V	413	M	V413M	4.39E-05	gnomad	cancer-risk	non-cancer_pathogenic
ALDH1L2	K	415	E	K415E	4.00E-06	gnomad	cancer-risk	benign
ALDH1L2	K	415	Q	K415Q	4.00E-06	gnomad	benign	benign
ALDH1L2	K	415	T	K415T	4.00E-06	gnomad	cancer-risk	non-cancer_pathogenic
ALDH1L2	V	423	M	V423M	3.18E-05	gnomad	cancer-risk	non-cancer_pathogenic
ALDH1L2	V	426	A	V426A	3.20E-05	gnomad	cancer-risk	benign
ALDH1L2	V	427	I	V427I	8.02E-06	gnomad	cancer-risk	benign
ALDH1L2	Y	429	H	Y429H	1.21E-05	gnomad	cancer-risk	benign
ALDH1L2	E	433	K	E433K	1.19E-05	gnomad	cancer-risk	non-cancer_pathogenic
ALDH1L2	M	438	T	M438T	7.96E-06	gnomad	benign	benign
ALDH1L2	V	439	I	V439I	3.98E-06	gnomad	cancer-risk	benign
ALDH1L2	V	439	L	V439L	1.19E-05	gnomad	cancer-risk	benign
ALDH1L2	M	441	I	M441I	9.15E-05	gnomad	cancer-risk	benign
ALDH1L2	M	441	T	M441T	3.98E-06	gnomad	benign	non-cancer_pathogenic
ALDH1L2	I	447	T	I447T	1.59E-05	gnomad	benign	benign
ALDH1L2	Q	450	H	Q450H	3.98E-06	gnomad	benign	non-cancer_pathogenic
ALDH1L2	A	454	V	A454V	3.98E-06	gnomad	cancer-risk	benign
ALDH1L2	D	455	E	D455E	7.96E-06	gnomad	cancer-risk	benign
ALDH1L2	D	456	N	D456N	1.19E-05	gnomad	cancer-risk	benign
ALDH1L2	G	457	R	G457R	3.18E-05	gnomad	cancer-risk	non-cancer_pathogenic
ALDH1L2	K	458	E	K458E	3.98E-06	gnomad	benign	benign
ALDH1L2	T	459	I	T459I	3.98E-06	gnomad	cancer-risk	benign
ALDH1L2	T	462	S	T462S	0.000127	gnomad	benign	benign
ALDH1L2	N	464	D	N464D	1.19E-05	gnomad	cancer-risk	non-cancer_pathogenic
ALDH1L2	P	465	Q	P465Q	3.98E-06	gnomad	cancer-risk	non-cancer_pathogenic
ALDH1L2	P	465	S	P465S	3.98E-06	gnomad	cancer-risk	non-cancer_pathogenic
ALDH1L2	D	467	V	D467V	3.58E-05	gnomad	benign	non-cancer_pathogenic
ALDH1L2	G	468	V	G468V	3.18E-05	gnomad	cancer-risk	non-cancer_pathogenic
ALDH1L2	T	470	K	T470K	3.19E-05	gnomad	benign	non-cancer_pathogenic
ALDH1L2	I	471	T	I471T	4.17E-06	gnomad	benign	non-cancer_pathogenic
ALDH1L2	C	472	S	C472S	8.35E-06	gnomad	benign	non-cancer_pathogenic
ALDH1L2	V	474	A	V474A	4.16E-06	gnomad	cancer-risk	benign
ALDH1L2	A	477	T	A477T	0.000191	gnomad	benign	benign
ALDH1L2	V	482	I	V482I	1.60E-05	gnomad	cancer-risk	benign
ALDH1L2	K	484	T	K484T	1.60E-05	gnomad	cancer-risk	non-cancer_pathogenic
ALDH1L2	A	489	E	A489E	3.19E-05	gnomad	cancer-risk	non-cancer_pathogenic
ALDH1L2	K	490	E	K490E	3.99E-06	gnomad	cancer-risk	benign
ALDH1L2	D	491	H	D491H	3.99E-06	gnomad	benign	non-cancer_pathogenic
ALDH1L2	A	492	G	A492G	3.19E-05	gnomad	cancer-risk	benign
ALDH1L2	F	493	I	F493I	3.99E-06	gnomad	cancer-risk	non-cancer_pathogenic
ALDH1L2	F	493	S	F493S	3.99E-06	gnomad	cancer-risk	benign
ALDH1L2	E	494	V	E494V	3.99E-06	gnomad	benign	benign
ALDH1L2	G	496	S	G496S	8.52E-05	gnomad	cancer-risk	benign
ALDH1L2	R	506	T	R506T	4.05E-06	gnomad	benign	non-cancer_pathogenic
ALDH1L2	R	508	S	R508S	4.08E-06	gnomad	cancer-risk	non-cancer_pathogenic
ALDH1L2	L	509	F	L509F	4.11E-06	gnomad	cancer-risk	non-cancer_pathogenic
ALDH1L2	L	509	S	L509S	8.22E-06	gnomad	benign	non-cancer_pathogenic
ALDH1L2	D	515	V	D515V	4.25E-06	gnomad	cancer-risk	non-cancer_pathogenic
ALDH1L2	E	518	Q	E518Q	4.16E-06	gnomad	cancer-risk	benign
ALDH1L2	A	525	T	A525T	8.13E-06	gnomad	benign	non-cancer_pathogenic
ALDH1L2	A	525	V	A525V	4.07E-06	gnomad	cancer-risk	non-cancer_pathogenic
ALDH1L2	I	527	T	I527T	0.00038	gnomad	benign	non-cancer_pathogenic
ALDH1L2	A	529	V	A529V	1.61E-05	gnomad	cancer-risk	non-cancer_pathogenic
ALDH1L2	L	530	P	L530P	3.18E-05	gnomad	cancer-risk	non-cancer_pathogenic
ALDH1L2	A	534	S	A534S	4.01E-06	gnomad	cancer-risk	benign
ALDH1L2	A	534	T	A534T	8.03E-06	gnomad	benign	benign
ALDH1L2	V	535	A	V535A	1.20E-05	gnomad	cancer-risk	benign
ALDH1L2	Y	536	H	Y536H	4.00E-06	gnomad	cancer-risk	non-cancer_pathogenic
ALDH1L2	H	543	Q	H543Q	2.80E-05	gnomad	cancer-risk	non-cancer_pathogenic
ALDH1L2	I	544	S	I544S	4.00E-06	gnomad	benign	non-cancer_pathogenic
ALDH1L2	I	544	T	I544T	7.99E-06	gnomad	benign	non-cancer_pathogenic
ALDH1L2	R	552	S	R552S	4.02E-06	gnomad	benign	non-cancer_pathogenic
ALDH1L2	Y	553	H	Y553H	4.02E-06	gnomad	cancer-risk	non-cancer_pathogenic
ALDH1L2	C	558	W	C558W	4.04E-06	gnomad	benign	non-cancer_pathogenic
ALDH1L2	G	563	D	G563D	7.07E-06	gnomad	cancer-risk	non-cancer_pathogenic
ALDH1L2	S	564	P	S564P	3.98E-06	gnomad	cancer-risk	non-cancer_pathogenic
ALDH1L2	Q	570	R	Q570R	7.07E-06	gnomad	cancer-risk	non-cancer_pathogenic
ALDH1L2	R	572	C	R572C	3.98E-06	gnomad	benign	non-cancer_pathogenic
ALDH1L2	N	574	S	N574S	1.06E-05	gnomad	benign	non-cancer_pathogenic
ALDH1L2	R	575	G	R575G	3.98E-06	gnomad	cancer-risk	non-cancer_pathogenic
ALDH1L2	R	575	S	R575S	2.39E-05	gnomad	cancer-risk	non-cancer_pathogenic
ALDH1L2	N	576	S	N576S	7.95E-06	gnomad	cancer-risk	non-cancer_pathogenic
ALDH1L2	N	576	T	N576T	3.98E-06	gnomad	benign	benign
ALDH1L2	L	577	P	L577P	7.95E-06	gnomad	benign	non-cancer_pathogenic
ALDH1L2	L	577	V	L577V	0.00182	gnomad	benign	non-cancer_pathogenic
ALDH1L2	T	580	I	T580I	3.98E-06	gnomad	benign	non-cancer_pathogenic
ALDH1L2	K	582	E	K582E	3.98E-06	gnomad	benign	benign
ALDH1L2	K	582	Q	K582Q	1.19E-05	gnomad	benign	benign
ALDH1L2	P	584	S	P584S	7.95E-06	gnomad	cancer-risk	non-cancer_pathogenic
ALDH1L2	L	585	F	L585F	8.48E-05	gnomad	benign	benign
ALDH1L2	G	586	D	G586D	3.98E-06	gnomad	cancer-risk	non-cancer_pathogenic
ALDH1L2	I	591	V	I591V	3.98E-06	gnomad	benign	benign
ALDH1L2	P	593	L	P593L	1.06E-05	gnomad	benign	non-cancer_pathogenic
ALDH1L2	M	599	V	M599V	3.98E-06	gnomad	cancer-risk	non-cancer_pathogenic
ALDH1L2	S	605	T	S605T	3.98E-06	gnomad	cancer-risk	benign
ALDH1L2	A	606	V	A606V	3.98E-06	gnomad	cancer-risk	benign
ALDH1L2	A	607	P	A607P	3.98E-06	gnomad	cancer-risk	benign
ALDH1L2	T	614	I	T614I	7.96E-06	gnomad	benign	non-cancer_pathogenic
ALDH1L2	L	615	F	L615F	7.96E-06	gnomad	benign	non-cancer_pathogenic
ALDH1L2	V	616	L	V616L	1.59E-05	gnomad	benign	non-cancer_pathogenic
ALDH1L2	K	618	R	K618R	1.06E-05	gnomad	benign	benign
ALDH1L2	A	620	E	A620E	3.98E-06	gnomad	benign	non-cancer_pathogenic
ALDH1L2	T	623	M	T623M	1.77E-05	gnomad	benign	non-cancer_pathogenic
ALDH1L2	L	628	M	L628M	3.98E-06	gnomad	cancer-risk	benign
ALDH1L2	A	631	G	A631G	2.12E-05	gnomad	benign	benign
ALDH1L2	E	632	K	E632K	1.59E-05	gnomad	cancer-risk	benign
ALDH1L2	L	633	P	L633P	3.98E-06	gnomad	benign	non-cancer_pathogenic
ALDH1L2	V	635	M	V635M	7.07E-06	gnomad	benign	non-cancer_pathogenic
ALDH1L2	A	637	P	A637P	3.98E-06	gnomad	benign	non-cancer_pathogenic
ALDH1L2	F	639	C	F639C	3.98E-06	gnomad	benign	non-cancer_pathogenic
ALDH1L2	V	643	F	V643F	6.72E-05	gnomad	benign	non-cancer_pathogenic
ALDH1L2	I	646	F	I646F	3.98E-06	gnomad	benign	benign
ALDH1L2	I	647	T	I647T	3.98E-06	gnomad	benign	non-cancer_pathogenic
ALDH1L2	G	651	D	G651D	7.95E-06	gnomad	cancer-risk	non-cancer_pathogenic
ALDH1L2	G	652	C	G652C	3.98E-06	gnomad	cancer-risk	non-cancer_pathogenic
ALDH1L2	A	654	P	A654P	7.95E-06	gnomad	benign	benign
ALDH1L2	A	654	T	A654T	7.95E-06	gnomad	cancer-risk	benign
ALDH1L2	G	655	E	G655E	3.98E-06	gnomad	cancer-risk	non-cancer_pathogenic
ALDH1L2	Q	656	P	Q656P	3.98E-06	gnomad	cancer-risk	non-cancer_pathogenic
ALDH1L2	H	661	P	H661P	1.19E-05	gnomad	benign	non-cancer_pathogenic
ALDH1L2	R	665	C	R665C	2.12E-05	gnomad	benign	non-cancer_pathogenic
ALDH1L2	G	668	R	G668R	7.07E-06	gnomad	benign	non-cancer_pathogenic
ALDH1L2	F	669	S	F669S	3.18E-05	gnomad	cancer-risk	non-cancer_pathogenic
ALDH1L2	G	671	A	G671A	3.19E-05	gnomad	benign	benign
ALDH1L2	G	671	V	G671V	3.98E-06	gnomad	cancer-risk	non-cancer_pathogenic
ALDH1L2	I	675	S	I675S	7.95E-06	gnomad	cancer-risk	non-cancer_pathogenic
ALDH1L2	I	675	V	I675V	4.24E-05	gnomad	benign	benign
ALDH1L2	M	680	L	M680L	7.96E-06	gnomad	benign	non-cancer_pathogenic
ALDH1L2	S	686	N	S686N	3.98E-06	gnomad	cancer-risk	non-cancer_pathogenic
ALDH1L2	V	691	I	V691I	1.99E-05	gnomad	benign	benign
ALDH1L2	L	693	F	L693F	4.24E-05	gnomad	benign	benign
ALDH1L2	L	693	V	L693V	3.98E-06	gnomad	benign	non-cancer_pathogenic
ALDH1L2	L	695	F	L695F	3.98E-06	gnomad	benign	non-cancer_pathogenic
ALDH1L2	L	695	P	L695P	3.98E-06	gnomad	benign	non-cancer_pathogenic
ALDH1L2	G	697	V	G697V	3.19E-05	gnomad	cancer-risk	non-cancer_pathogenic
ALDH1L2	K	698	N	K698N	3.98E-06	gnomad	cancer-risk	benign
ALDH1L2	K	698	R	K698R	3.98E-06	gnomad	benign	benign
ALDH1L2	L	701	F	L701F	3.98E-06	gnomad	benign	non-cancer_pathogenic
ALDH1L2	I	702	M	I702M	3.98E-06	gnomad	benign	benign
ALDH1L2	I	702	T	I702T	6.37E-05	gnomad	benign	benign
ALDH1L2	I	703	M	I703M	3.98E-06	gnomad	benign	non-cancer_pathogenic
ALDH1L2	I	703	V	I703V	3.98E-06	gnomad	benign	benign
ALDH1L2	C	707	R	C707R	2.48E-05	gnomad	cancer-risk	non-cancer_pathogenic
ALDH1L2	R	714	G	R714G	3.98E-06	gnomad	cancer-risk	non-cancer_pathogenic
ALDH1L2	M	717	T	M717T	4.03E-06	gnomad	cancer-risk	non-cancer_pathogenic
ALDH1L2	A	719	E	A719E	4.04E-06	gnomad	cancer-risk	non-cancer_pathogenic
ALDH1L2	N	723	T	N723T	0.000331	gnomad	benign	non-cancer_pathogenic
ALDH1L2	K	724	E	K724E	4.06E-06	gnomad	benign	non-cancer_pathogenic
ALDH1L2	G	725	A	G725A	1.62E-05	gnomad	benign	non-cancer_pathogenic
ALDH1L2	N	727	K	N727K	4.02E-06	gnomad	cancer-risk	non-cancer_pathogenic
ALDH1L2	R	733	Q	R733Q	0.000114	gnomad	cancer-risk	non-cancer_pathogenic
ALDH1L2	R	733	W	R733W	6.39E-05	gnomad	cancer-risk	non-cancer_pathogenic
ALDH1L2	V	736	E	V736E	1.77E-05	gnomad	cancer-risk	non-cancer_pathogenic
ALDH1L2	E	738	K	E738K	3.98E-06	gnomad	cancer-risk	benign
ALDH1L2	S	739	F	S739F	4.60E-05	gnomad	benign	benign
ALDH1L2	H	741	N	H741N	7.08E-06	gnomad	cancer-risk	non-cancer_pathogenic
ALDH1L2	H	741	Q	H741Q	3.18E-05	gnomad	cancer-risk	non-cancer_pathogenic
ALDH1L2	V	745	L	V745L	3.99E-06	gnomad	cancer-risk	non-cancer_pathogenic
ALDH1L2	V	748	A	V748A	0.000113	gnomad	cancer-risk	non-cancer_pathogenic
ALDH1L2	E	750	K	E750K	3.98E-06	gnomad	cancer-risk	non-cancer_pathogenic
ALDH1L2	I	752	S	I752S	3.98E-06	gnomad	benign	non-cancer_pathogenic
ALDH1L2	K	753	E	K753E	7.96E-06	gnomad	benign	non-cancer_pathogenic
ALDH1L2	K	754	T	K754T	3.98E-06	gnomad	benign	non-cancer_pathogenic
ALDH1L2	M	755	L	M755L	3.98E-06	gnomad	benign	non-cancer_pathogenic
ALDH1L2	I	757	T	I757T	3.54E-05	gnomad	cancer-risk	non-cancer_pathogenic
ALDH1L2	P	760	L	P760L	3.98E-06	gnomad	cancer-risk	non-cancer_pathogenic
ALDH1L2	D	762	Y	D762Y	7.96E-06	gnomad	benign	non-cancer_pathogenic
ALDH1L2	T	765	S	T765S	3.98E-06	gnomad	benign	benign
ALDH1L2	D	766	G	D766G	7.95E-06	gnomad	benign	non-cancer_pathogenic
ALDH1L2	H	767	R	H767R	9.54E-05	gnomad	benign	non-cancer_pathogenic
ALDH1L2	K	773	N	K773N	1.19E-05	gnomad	cancer-risk	non-cancer_pathogenic
ALDH1L2	A	774	V	A774V	3.98E-06	gnomad	benign	benign
ALDH1L2	L	780	P	L780P	3.98E-06	gnomad	cancer-risk	non-cancer_pathogenic
ALDH1L2	Q	781	R	Q781R	3.98E-06	gnomad	cancer-risk	non-cancer_pathogenic
ALDH1L2	Y	782	H	Y782H	0.000329	gnomad	cancer-risk	non-cancer_pathogenic
ALDH1L2	C	783	Y	C783Y	3.19E-05	gnomad	benign	non-cancer_pathogenic
ALDH1L2	T	785	A	T785A	3.98E-06	gnomad	benign	benign
ALDH1L2	V	787	L	V787L	3.98E-06	gnomad	benign	non-cancer_pathogenic
ALDH1L2	K	788	I	K788I	0.00012	gnomad	benign	benign
ALDH1L2	G	790	W	G790W	3.98E-06	gnomad	benign	non-cancer_pathogenic
ALDH1L2	T	792	I	T792I	3.98E-06	gnomad	benign	non-cancer_pathogenic
ALDH1L2	V	794	A	V794A	3.98E-06	gnomad	benign	non-cancer_pathogenic
ALDH1L2	V	794	L	V794L	3.18E-05	gnomad	benign	non-cancer_pathogenic
ALDH1L2	V	794	M	V794M	3.18E-05	gnomad	benign	non-cancer_pathogenic
ALDH1L2	R	802	T	R802T	7.08E-06	gnomad	cancer-risk	non-cancer_pathogenic
ALDH1L2	P	803	A	P803A	3.98E-06	gnomad	cancer-risk	benign
ALDH1L2	F	806	L	F806L	8.19E-06	gnomad	cancer-risk	non-cancer_pathogenic
ALDH1L2	F	806	S	F806S	4.08E-06	gnomad	cancer-risk	non-cancer_pathogenic
ALDH1L2	F	812	S	F812S	1.20E-05	gnomad	cancer-risk	non-cancer_pathogenic
ALDH1L2	M	819	I	M819I	7.97E-06	gnomad	cancer-risk	non-cancer_pathogenic
ALDH1L2	M	819	V	M819V	7.97E-06	gnomad	cancer-risk	non-cancer_pathogenic
ALDH1L2	A	822	S	A822S	3.99E-06	gnomad	cancer-risk	non-cancer_pathogenic
ALDH1L2	A	822	T	A822T	3.19E-05	gnomad	cancer-risk	non-cancer_pathogenic
ALDH1L2	P	829	R	P829R	3.99E-06	gnomad	cancer-risk	non-cancer_pathogenic
ALDH1L2	I	830	M	I830M	4.61E-05	gnomad	benign	non-cancer_pathogenic
ALDH1L2	I	830	T	I830T	7.98E-06	gnomad	benign	non-cancer_pathogenic
ALDH1L2	M	831	T	M831T	3.59E-05	gnomad	cancer-risk	non-cancer_pathogenic
ALDH1L2	V	832	I	V832I	6.37E-05	gnomad	benign	benign
ALDH1L2	S	834	T	S834T	4.02E-06	gnomad	cancer-risk	non-cancer_pathogenic
ALDH1L2	K	835	T	K835T	1.61E-05	gnomad	benign	non-cancer_pathogenic
ALDH1L2	N	838	I	N838I	4.06E-06	gnomad	benign	non-cancer_pathogenic
ALDH1L2	G	843	R	G843R	3.99E-06	gnomad	cancer-risk	non-cancer_pathogenic
ALDH1L2	L	845	S	L845S	3.18E-05	gnomad	cancer-risk	benign
ALDH1L2	L	845	W	L845W	3.98E-06	gnomad	benign	non-cancer_pathogenic
ALDH1L2	Q	846	K	Q846K	3.19E-05	gnomad	cancer-risk	benign
ALDH1L2	R	847	L	R847L	3.98E-06	gnomad	cancer-risk	benign
ALDH1L2	N	849	D	N849D	3.18E-05	gnomad	cancer-risk	non-cancer_pathogenic
ALDH1L2	S	850	N	S850N	3.98E-06	gnomad	benign	benign
ALDH1L2	E	852	V	E852V	3.98E-06	gnomad	benign	benign
ALDH1L2	Y	853	H	Y853H	7.96E-06	gnomad	benign	non-cancer_pathogenic
ALDH1L2	G	858	A	G858A	3.98E-06	gnomad	cancer-risk	non-cancer_pathogenic
ALDH1L2	V	859	I	V859I	1.41E-05	gnomad	benign	benign
ALDH1L2	R	862	G	R862G	3.18E-05	gnomad	cancer-risk	non-cancer_pathogenic
ALDH1L2	I	864	V	I864V	3.18E-05	gnomad	cancer-risk	benign
ALDH1L2	K	866	N	K866N	3.98E-06	gnomad	benign	non-cancer_pathogenic
ALDH1L2	K	866	Q	K866Q	7.96E-06	gnomad	benign	non-cancer_pathogenic
ALDH1L2	M	868	I	M868I	7.07E-06	gnomad	cancer-risk	non-cancer_pathogenic
ALDH1L2	V	870	M	V870M	7.96E-06	gnomad	cancer-risk	non-cancer_pathogenic
ALDH1L2	L	874	P	L874P	3.98E-06	gnomad	cancer-risk	non-cancer_pathogenic
ALDH1L2	G	877	E	G877E	7.96E-06	gnomad	cancer-risk	non-cancer_pathogenic
[truncated: 1,944 more rows]
